# Supplementary material for: Effect of preterm birth on later FEV1: a systematic review and meta-analysis
Source: HighWire-hosted journal article supplement (doi:10.1136/thoraxjnl-2012-203079), 2013-04-20
Supplement: thoraxjnl-2012-203079supp.pdf [file thoraxjnl-2012-203079supp.pdf]

## **The effect of preterm birth on later forced expiratory volume in one second - a systematic review and meta-analysis**

### **- a systematic review and meta-analysis**

Sarah J Kotecha, Martin O Edwards, W John Watkins, John Henderson, Shantini Paranjothy, Frank D Dunstan, Sailesh Kotecha.

### **ONLINE DATA SUPPLEMENT**

#### **Analysis including only the higher quality articles**

In the preterm-born group without BPD, the mean difference for %FEV<sub>1</sub> was -6.9% (95%CI -8.7%, -5.1%) compared to term-born controls. The comparisons between the BPD and term-born groups; mean difference for BPD<sub>28</sub> and BPD<sub>36</sub> groups were -16.4% (95% CI -20.9%, -11.9%) and -18.9% (95%CI -21.1%, -16.7%). The mean difference for %FEV<sub>1</sub> was -9.0% (95%CI -11.4%, -6.5%) for the preterm-born subjects (including BPD cases) compared to term-born controls.

**Table E1a:- Description of the included articles preterm group (no BPD) compared to term control group**

| STUDY                     | QUALITY SCORE | OBJECTIVE                                                                                                                                           | STUDY DESIGN    | STUDY GROUP                                                                                | CONTROL GROUP                                               | OUTCOME MEASURES                                                                       |
|---------------------------|---------------|-----------------------------------------------------------------------------------------------------------------------------------------------------|-----------------|--------------------------------------------------------------------------------------------|-------------------------------------------------------------|----------------------------------------------------------------------------------------|
| Fawke <sup>E1</sup>       | 16            | To assess the degree of respiratory morbidity and in extremely premature children in relation to current clinical status and neonatal determinants. | Cohort study    | 182 EP (<25 weeks gestation) 53 with no BPD                                                | 161 classmate controls excluded classmates who were preterm | Spirometry<br>Post-bronchodilator response<br>Questionnaire                            |
| Arad <sup>E2</sup>        | 8             | To compare lung function following neonatal intensive respiratory care on the same children in infancy and childhood                                | Follow up study | 10 PT                                                                                      | X                                                           | Spirometry                                                                             |
| De Kleine <sup>E3</sup>   | 18            | Examine the effect of lung injury caused by IPPV for HMD on lung function in children                                                               | Follow up study | 40 PT ventilated for HMD (29 non BPD 27 with LF results) and 38 PT non ventilated with HMD | 39 randomly selected pupils of a similar age                | Spirometry<br>Respiratory symptoms questionnaire<br>Review of follow up records for PT |
| Doyle <sup>E4</sup>       | 19            | To determine the respiratory health of children of birthweight <1501g, compared to NBW controls in adolescence                                      | Cohort study    | 180 VLBW (<1501g) -130 no BPD with spirometry results                                      | 42 NBW (>2499g), 39 with spirometry results                 | Spirometry<br>Assessment of respiratory health                                         |
| Kulasekaran <sup>E5</sup> | 14            | To determine the                                                                                                                                    | Cohort          | 45 PT children                                                                             | X                                                           | Respiratory outcome                                                                    |

|                                     |    |                                                                                                                                             |                 |                                                                                                     |                                                      |                                                                                                                                         |
|-------------------------------------|----|---------------------------------------------------------------------------------------------------------------------------------------------|-----------------|-----------------------------------------------------------------------------------------------------|------------------------------------------------------|-----------------------------------------------------------------------------------------------------------------------------------------|
|                                     |    | respiratory outcome of children who had BPD compared with a preterm control group of children at school age.                                |                 | (44 with LF results)                                                                                |                                                      | Family History                                                                                                                          |
| <b>Doyle</b> <sup>E6</sup>          | 17 | To determine respiratory function at 8 years in ELBW, very PT children born in the 1990s compared with NBW controls                         | Cohort          | 298 ELBW (<1000g)/ very preterm (< 28 weeks gestation) 240 with LF results of which 151 with no BPD | 208 NBW (>2499g)                                     | Spirometry<br>ISAAC questionnaire                                                                                                       |
| <b>Galdes-Sebaldt</b> <sup>E7</sup> | 11 | To evaluate the long-term effect of prematurity and/or HMD on pulmonary function and airway reactivity.                                     | Follow up study | 30 <1500g children split into 2 groups no HMD and HMD                                               | 27 terms                                             | Spirometry<br>Questionnaire<br>Airway reactivity                                                                                        |
| <b>Giacioia</b> <sup>E8</sup>       | 12 | To investigate the outcome of school-age children with BPD compared to a preterm cohort and term control group                              | Cohort          | 12 PT                                                                                               | 12 Term Controls                                     | Spirometry<br>Body Composition<br>Dietary intake<br>Intelligence test scores                                                            |
| <b>Gross</b> <sup>E9</sup>          | 19 | To assess long-term pulmonary outcome of a regional cohort of children born <32 weeks' gestation compared with a matched term control group | Cohort          | 125 PT children born at 24 to 31 weeks gestation. 53 without BPD had spirometry                     | 108 healthy term (38 to 42 weeks gestation) controls | Spirometry<br>Bronchodilator responsiveness<br>Ongoing health problems<br>Rehospitalisation<br>Respiratory symptoms<br>Exercise testing |
| <b>Halvorsen</b> <sup>E10</sup>     | 15 | To investigate long term                                                                                                                    | Population-     | 2 population                                                                                        | 81 term                                              | Spirometry                                                                                                                              |

|                                  |    |                                                                                                                                                                                                                                |                                 |                                                                                    |                                                                            |                                                                                                                                   |
|----------------------------------|----|--------------------------------------------------------------------------------------------------------------------------------------------------------------------------------------------------------------------------------|---------------------------------|------------------------------------------------------------------------------------|----------------------------------------------------------------------------|-----------------------------------------------------------------------------------------------------------------------------------|
|                                  |    | outcomes in young people after extremely preterm birth and BPD                                                                                                                                                                 | based long-term follow-up study | based cohorts $\leq$ 28 weeks gestation or $\leq$ 1000g birthweight 19 with no BPD | controls birth weight between 3 and 4 kg                                   | ISAAC questionnaire<br>Metacholine provocation test<br>Exercise induced asthma and reversibility to salbutamol<br>Allergy testing |
| <b>Smith</b> <sup>E11</sup>      | 9  | The aim of the study was to investigate the role of neonatal influences including post-natal corticosteroids and a diagnosis of BPD, on long-term respiratory outcomes in a group of children born very preterm in the 1990s.  | Cross-sectional study           | 102 PT children<br>65 no BPD                                                       | X                                                                          | Spirometry<br>ISAAC questionnaire                                                                                                 |
| <b>Jacob</b> <sup>E12, E13</sup> | 15 | To evaluate the long-term pulmonary sequelae of survivors of BPD of sufficient severity to have required oxygen for at least one month after term.                                                                             | Cohort study                    | 30 PT children<br>15 no BPD                                                        | 13 healthy term children                                                   | Bronchial symptom questionnaire<br>Spirometry<br>Lung elastic recoil pressure<br>Response to a bronchodilator                     |
| <b>Kennedy</b> <sup>E14</sup>    | 15 | To assess the importance of the contributions of birth weight, gestational age, neonatal respiratory illness, and its treatment on subsequent childhood lung function in a cohort of children of birth weight less than 1500g. | Cohort study                    | VLBW cohort (<1500g) 76 no BPD                                                     | 82 control children , 1 birth weight <2kg, 2 born at 36 weeks rest at term | Spirometry<br>Respiratory questionnaire                                                                                           |
| <b>Kilbride</b> <sup>E15</sup>   | 14 | To assess pulmonary function and exercise                                                                                                                                                                                      | Longitudinal follow up study    | 50 ELBW children <801g                                                             | 25 age matched NBW children                                                | Medical history and recent Hospitalisations                                                                                       |

|                                 |    |                                                                                                                                                                                                                           |                   |                                                                   |                                                                     |                                                                                  |
|---------------------------------|----|---------------------------------------------------------------------------------------------------------------------------------------------------------------------------------------------------------------------------|-------------------|-------------------------------------------------------------------|---------------------------------------------------------------------|----------------------------------------------------------------------------------|
|                                 |    | capacity of apparently asymptomatic children who were born EP                                                                                                                                                             |                   | 34 no BPD                                                         | >37 weeks gestation and >2500g BW                                   | Spirometry<br>Exercise testing                                                   |
| <b>Korhonen</b> <sup>E16</sup>  | 16 | To assess respiratory outcome and its predictors during the surfactant era in VLBW schoolchildren with and without BPD                                                                                                    | Cohort            | VLBW cohort (<1500g) 34 no BPD of which 31 had spirometry results | 34 term controls of which 33 had spirometry results                 | Spirometry<br>Mailed questionnaire<br>Atopic tendency testing                    |
| <b>Baraldi</b> <sup>E17</sup>   | 12 | To assess the cardio-respiratory and metabolic response to exercise in VLBW children and to compare exercise performance in AGA versus SGA                                                                                | Area cohort study | 15 VLBW children (<1501g)                                         | 26 born at term but data not given for spirometry                   | Spirometry<br>Questionnaire<br>Exercise testing                                  |
| <b>Baraldi</b> <sup>E18</sup>   | 11 | To measure exhaled nitric oxide and lung function in a group of school-age survivors of BPD.                                                                                                                              | Cohort study      | 31 non BPD, PT                                                    | 31 healthy children born at term matched for sex and age            | Spirometry<br>Reversibility to $\beta_2$ -Agonists<br>Allergometric study        |
| <b>Barker</b> <sup>E19</sup>    | 16 | To assess the long-term outcome in respiratory morbidity, lung function, submaximal, and peak exercise capacity among a local cohort of school children with a history of treatment in a NICU after preterm birth at VLBW | Area cohort study | 13 no BPD, VLBW birth weight < 1500g, and PT birth <37 weeks      | 13 healthy children born at term matched for age, height and weight | Spirometry<br>Interview on respiratory history and morbidity<br>Exercise testing |
| <b>Mieskonen</b> <sup>E20</sup> | 13 | To evaluate the possible inflammatory basis of lung function abnormalities                                                                                                                                                | Cohort study      | 40 children with a gestational age $\leq$ 30 weeks or             | 14 term controls                                                    | Spirometry<br>Questionnaires<br>Skin Prick Tests<br>Measurement of exhaled       |

|                                |    |                                                                                                                                                                                       |                          |                                                                      |                                        |                                                           |
|--------------------------------|----|---------------------------------------------------------------------------------------------------------------------------------------------------------------------------------------|--------------------------|----------------------------------------------------------------------|----------------------------------------|-----------------------------------------------------------|
|                                |    |                                                                                                                                                                                       |                          | birthweight<br><1500g 18 no<br>BPD                                   |                                        | nitric oxide<br>Spirometry before and after<br>Salbutamol |
| <b>Pianos<sup>E21</sup></b>    | 11 | To assess the hypothesis that there would be no significant difference in childhood lung function between patients who were ventilated by conventional or high frequency ventilation. | Cohort study             | 15 non BPD                                                           | 15 term born matched controls          | Spirometry<br>Bronchodilator responsiveness               |
| <b>Palta<sup>E22</sup></b>     | 15 | To determine lung function at 10 years in VLBW children and controls                                                                                                                  | Cohort study             | 265 VLBW children ≤ 1500g 206 without BPD                            | 360 unselected controls                | Spirometry<br>Home spirometry                             |
| <b>Mitchell<sup>E23</sup></b>  | 11 | To test the hypothesis that gas transfer during exercise is reduced in survivors of BPD relative to age-matched control subjects                                                      | Cohort study             | 10 no BPD                                                            | 10 similar age born full term controls | Spirometry<br>Exercise testing<br>Questionnaire           |
| <b>Vrijlandt<sup>E24</sup></b> | 14 | To investigate the long term effects of prematurity on lung function and exercise capacity                                                                                            | Prospective cohort study | 12 no BPD (gestational age <32 weeks and/or birthweight under 1500g) | 48 healthy term controls               | Spirometry<br>Exercise testing                            |
| <b>Wheeler<sup>E25</sup></b>   | 7  | To assess and compare lung function in BPD, RDS, PT and term children                                                                                                                 | Case control study       | 14 PT                                                                | 11 normal term delivery children       | Spirometry                                                |
| <b>Abreu<sup>E26</sup></b>     | 14 | To investigate cardio respiratory capacity and investigate the presence                                                                                                               | Case control study       | 13 PT children 10 with LF results                                    | 20 term children 17 with LF results    | Spirometry<br>Exercise testing                            |

|                                                                             |    |                                                                                                                                                      |              |                                                |                          |                                                                                                         |
|-----------------------------------------------------------------------------|----|------------------------------------------------------------------------------------------------------------------------------------------------------|--------------|------------------------------------------------|--------------------------|---------------------------------------------------------------------------------------------------------|
|                                                                             |    | of exercise-induced bronchospasm among children with BPD                                                                                             |              |                                                |                          |                                                                                                         |
| <b>Guimaraes<sup>E27</sup></b><br><b>(Data as Medians in paper)</b>         | 8  | To assess pulmonary function and the prevalence of atopy in school age children who were VLBW and to compare those who had BPD to those who did not. | Cohort study | 85 VLBW children 64 with no BPD had LF results | X                        | Spirometry<br>Questionnaire<br>Allergy skin prick test                                                  |
| <b>Hakulinen<sup>E28</sup></b><br><b>(Data as Medians in paper)</b>         | 13 | To determine the extent to which BPD affects the diffusing properties of lung tissue in childhood.                                                   | Cohort study | 11 PT children <1250g without BPD              | 20 healthy term children | Spirometry<br>Questionnaire                                                                             |
| <b>Berggren Brostrom<sup>E29</sup></b><br><b>(Data as Medians in paper)</b> | 8  | To examine the impact of the severity of BPD on pulmonary morbidity at school age                                                                    | Cohort       | 60 VLBW children 28 with no BPD                | X                        | Spirometry<br>Oscillometry<br>Thoracic HRCT<br>Allergy skin-prick test<br>Blood sample<br>questionnaire |

**Table E1b:- Demographics of the included articles preterm group (no BPD) compared to term control group**

| <b>STUDY COUNTRY</b> | <b>SUBJECTS (GENDER)</b> | <b>GA (WEEKS)</b> | <b>BW (GRAMS)</b> | <b>DURATION ON MECHANICAL</b> | <b>AGE TESTED (YEARS)</b> | <b>YEAR OF</b> | <b>SURFACTANT GIVEN</b> | <b>METHOD OF MEASURING LUNG</b> | <b>METHOD OF STANDARDISING</b> |
|----------------------|--------------------------|-------------------|-------------------|-------------------------------|---------------------------|----------------|-------------------------|---------------------------------|--------------------------------|
|----------------------|--------------------------|-------------------|-------------------|-------------------------------|---------------------------|----------------|-------------------------|---------------------------------|--------------------------------|

|                                                             |                                                                                                     |                                                                                              |                                                                                             | VENTILATION<br>(DAYS)                                                                              |                                                                                                              | BIRTH         |                            | FUNCTION                                                                                                 | LUNG FUNCTION<br>MEASUREMENTS                                                                             |
|-------------------------------------------------------------|-----------------------------------------------------------------------------------------------------|----------------------------------------------------------------------------------------------|---------------------------------------------------------------------------------------------|----------------------------------------------------------------------------------------------------|--------------------------------------------------------------------------------------------------------------|---------------|----------------------------|----------------------------------------------------------------------------------------------------------|-----------------------------------------------------------------------------------------------------------|
| <b>Fawke<sup>E1</sup></b><br><b>UK and Ireland</b>          | No BPD<br>(20M,<br>33F),<br>Controls<br>(43% M)                                                     | No BPD<br>mean 25.1,<br>SD 0.6<br>Control X<br>excluded if<br>preterm                        | No BPD<br>mean 780,<br>SD 120,<br>Controls X                                                | X                                                                                                  | Range 10.1<br>to 12.1.<br>EP No BPD<br>mean 10.9,<br>SD 0.4.<br>Controls<br>mean 10.9<br>SD 0.55.            | 1995          | No BPD 39/53<br>Controls X | Portable spirometer<br>(Jaeger Masterscope,<br>Lab Manager, V4.65;<br>CareFusion,<br>Hoechberg, Germany) | Spirometry data were<br>expressed as z-scores<br>to adjust for height,<br>age and sex <sup>E30, E31</sup> |
| <b>Arad<sup>E2</sup></b><br><b>Israel</b>                   | X                                                                                                   | PT group<br>mean 30.4,<br>range 28-35                                                        | PT 1257g<br>Range 900-<br>1900                                                              | 8 for between<br>1 and 11 days,<br>4 being<br>ventilated for<br>4 or more days                     | Mean 6.8<br>years SD 0.6                                                                                     | 1977-<br>1979 | X                          | Pneumotachograph-<br>based system<br>(Hewlett-Packard<br>47120A Pulmonary<br>Desk System)                | Expressed as<br>percentage<br>predicted <sup>E32</sup>                                                    |
| <b>De Kleine<sup>E3</sup></b><br><b>The<br/>Netherlands</b> | 29 non<br>BPD (19M,<br>10F),<br>38 non<br>ventilated<br>(24M,<br>14F),<br>39 controls<br>(20M, 19F) | Non BPD<br>mean 32.2<br>SD 1.8, Non<br>ventilated<br>mean 31.8<br>SD 1.9,<br>Controls X      | Non BPD<br>mean 1952<br>SD 460, Non<br>ventilated<br>mean 1809<br>SD 419,<br>Controls X     | Non BPD<br>29/29 mean<br>2.9 days<br>(range 0.8-<br>6.9), non<br>ventilated<br>0/38,<br>Controls X | Non BPD<br>mean 12.3<br>SD 2.9, Non<br>ventilated<br>mean 12.8<br>SD 2.7,<br>Controls<br>mean 13.7<br>SD 1.6 | 1967-<br>1977 | X                          | Water sealed<br>spirometer (Lode<br>instruments,<br>Groningen,<br>Netherlands)                           | Lung function as<br>percentage predicted<br>for sex and height <sup>E32,<br/>E33</sup>                    |
| <b>Doyle<sup>E4</sup></b><br><b>Australia</b>               | 500-999g<br>group<br>(35M,<br>43F), 1000-<br>1500g<br>group<br>(55m, 47F)                           | 500-999g<br>group mean<br>27.5 SD 2.3,<br>1000-1500g<br>group mean<br>29.6 SD 1.5,<br>>2499g | 500-999g<br>group mean<br>859 SD 100,<br>1000-1500g<br>group mean<br>1259 SD<br>145, >2499g | X                                                                                                  | 500-999g<br>group mean<br>14.1 SD 0.2,<br>1000-1500g<br>group mean<br>14.2 SD 0.3,<br>>2499g                 | 1977-<br>1982 | Not given                  | Jaeger Bodyscreen II-<br>Bodybox (Jaeger,<br>Germany)                                                    | Lung function as<br>percentage predicted<br>for age, height and<br>gender <sup>E34</sup>                  |



|                                               |                                                                             |                                                                                                                                                 |                                                                                                                                                        |                                                            |                                                                                                         |           |                                   |                                                                            |                                                                                                         |
|-----------------------------------------------|-----------------------------------------------------------------------------|-------------------------------------------------------------------------------------------------------------------------------------------------|--------------------------------------------------------------------------------------------------------------------------------------------------------|------------------------------------------------------------|---------------------------------------------------------------------------------------------------------|-----------|-----------------------------------|----------------------------------------------------------------------------|---------------------------------------------------------------------------------------------------------|
|                                               | >2499g group (26M, 16F)                                                     | group mean 39.9 SD 1.0                                                                                                                          | group mean 3420 SD 427                                                                                                                                 |                                                            | group mean 14.2 SD 0.1                                                                                  |           |                                   |                                                                            |                                                                                                         |
| <b>Kulasekaran<sup>E5</sup><br/>Australia</b> | PT group (22M, 23F)                                                         | PT group mean 28.3 SD 1.0                                                                                                                       | PT group mean 1090 SD 210                                                                                                                              | PT 30/45, days of mechanical ventilation median 1, IQR 0-3 | 7-10                                                                                                    | 1989-1990 | 0/45                              | Pulmonary function laboratory system (Sensormedics, Yorba Linda, CA, USA)  | Spirometry data was expressed as percentage predicted values for height, age and gender <sup>E35</sup>  |
| <b>Doyle<sup>E6</sup><br/>Australia</b>       | No BPD X, Control group (98M, 110F)                                         | No BPD group mean 27 .2, SD 2.0 Control group X                                                                                                 | No BPD group mean 912, SD 143, Control group Control group >2499                                                                                       | X                                                          | 8-9                                                                                                     | 1991-1992 | In whole PT cohort 92/240 treated | Jaeger Body-screen II Bodybox (Jaeger, Germany)                            | Results expressed as percentage predicted for age, height and gender <sup>E34</sup>                     |
| <b>Galdes-Sebaldt<sup>E7</sup><br/>USA</b>    | <1500g no HMD group (11M, 8F), <1500g HMD group (3M,8F) Controls (14M, 13F) | <1500g no HMD group mean 29.3, SEM 0.4, range 26-32, <1500g HMD group mean 29.5, SEM 0.6, range 26-32, Controls mean 39.9, SEM 0.2, range 38-42 | <1500g no HMD group mean 1044, SEM 30, range 900-1290, <1500g HMD group mean 1217, SEM 34, range 964-1361, Controls mean 3429, SEM 64, range 2707-4111 | <1500g no HMD 13/19, <1500g HMD 9/11, Controls X           | <1500g no HMD group mean 11.1, SEM 0.2, <1500g HMD group mean 11.2, SEM 0.2, Controls mean 11.6 SEM 0.2 | 1973-1977 | X                                 | Automated pulmonary function lab model M100B (SRL Medical Inc, Dayton, OH) | Results as percentage predicted adjusted for height and sex <sup>E35</sup> and ethnicity <sup>E36</sup> |

|                                                  |                                                   |                                                              |                                                               |                                                         |                                                                         |                         |   |                                                                              |                                                                                                               |
|--------------------------------------------------|---------------------------------------------------|--------------------------------------------------------------|---------------------------------------------------------------|---------------------------------------------------------|-------------------------------------------------------------------------|-------------------------|---|------------------------------------------------------------------------------|---------------------------------------------------------------------------------------------------------------|
| <b>Giacoia<sup>E8</sup></b><br><b>USA</b>        | PT group (5M, 7F), Controls (5M, 7F)              | PT group mean 30.3 SD 1.54, Controls mean 40.07 SD 0.27      | PT group mean 1162 SD 216, Controls mean 3663 SD 777          | PT group mean 8 days, SD 6.4, Controls mean 0           | PT group mean 12.3 SEM 2.6, Controls mean 11.9 SEM 1.6                  | 1978-1986               | X | SensorMedics model 2600 pulmonary function monitor (SensorMedics Corp)       | Results as percentage predicted <sup>X</sup>                                                                  |
| <b>Gross<sup>E9</sup></b><br><b>USA</b>          | No BPD group (27M, 26F), Control group (62M, 46F) | No BPD group mean 29 SD 2, Control group mean 40.1 SD 1.1    | No BPD group mean 1270 SD 306, Control group mean 3565 SD 427 | 55% of no BPD group median 6                            | 7                                                                       | 1985-1986               | 0 | SensorMedics 2200 Pulmonary Function Equipment (SensorMedics, Anaheim Calif) | Results as percentage predicted for age, height and sex <sup>E37, E38</sup>                                   |
| <b>Halvorsen<sup>E10</sup></b><br><b>Norway</b>  | No BPD (12F, 7M) Controls (42F, 39M)              | No BPD mean 28.3 SD 1.5 Control group term                   | No BPD mean 1115.1 SD 158.5 Control group mean 3494 SD 300    | No BPD mean 0.5 Range 0-4.8                             | 2 populations assessed 2nd mean 10.6 SD 0.4 1 <sup>st</sup> 17.7 SD 1.2 | 1982-1985 and 1991-1992 | X | Vmax 22 spirometer (SensorMedics Inc., Anaheim, USA)                         | Expressed as percentage of the predicted values <sup>E39</sup>                                                |
| <b>Smith<sup>E11</sup></b><br><b>Australia</b>   | X                                                 | For whole preterm group all <32 weeks gestation mean 27 SD 2 | For whole preterm group mean 862 SD 161                       | X                                                       | Mean age of BPD and No BPD groups together 10 SD 1                      | 1992-1994               | X | Vmax V62J Autobox (Sensormedics Corp, Yorba Linda, CA)                       | Expressed as percentage predicted <sup>E40, E35, E41</sup>                                                    |
| <b>Jacob<sup>E12, E13</sup></b><br><b>Canada</b> | No BPD (6M, 9F), Controls X                       | No BPD group mean 28.5 SD 2.6 Control group term             | No BPD group mean 1044 SD 262.9 Control                       | No BPD group days of ventilatory assistance median 8.0, | No BPD group mean 11.2 SD 1.5 Control                                   | 1981-1987               | X | X                                                                            | Expressed as a percentage predicted for sex and height <sup>E35</sup> . For black subjects 15% was subtracted |

|                                            |                                               |                                                                 |                                                                          |                                                                      |                                                                                        |           |                                    |                                                                                                                  |                                                                                     |
|--------------------------------------------|-----------------------------------------------|-----------------------------------------------------------------|--------------------------------------------------------------------------|----------------------------------------------------------------------|----------------------------------------------------------------------------------------|-----------|------------------------------------|------------------------------------------------------------------------------------------------------------------|-------------------------------------------------------------------------------------|
|                                            |                                               |                                                                 | group X                                                                  | IQR 4.0-32.0<br>Control group X                                      | group 10.6<br>SD 2.1                                                                   |           |                                    |                                                                                                                  | from the predicted values for spirometry <sup>E42</sup>                             |
| <b>Kennedy<sup>E14</sup><br/>Australia</b> | No BPD (33M, 43F)<br>Control group (39M, 43F) | No BPD group mean 30.6 SD 2.5,<br>Control mean 40.0 SD 1.6      | No BPD group mean 1228.6 SD 204.6,<br>Control group mean 3459.1 SD 509.0 | Duration of IPPV No BPD group median 0.7 IQR 0.5, 1.0<br>Control n/a | No BPD group mean 11.3 SD 0.8,<br>Control 11.4 SD 0.8                                  | 1981-1982 | X                                  | Pulmonary function testing was performed using the Jaeger Masterlab system                                       | Results were evaluated as percentage predicted for gender and height <sup>E34</sup> |
| <b>Kilbride<sup>E15</sup><br/>USA</b>      | All ELBW (16M, 34F)<br>Control (11M, 14F)     | ELBW mean 261 SD 1.6<br>NBW >37                                 | ELBW mean 701 SD 80<br>NBW >2500                                         | ELBW mean 33 days SD 20<br>range 0-78                                | ELBW group mean 11.3, SD 1.6<br>NBW mean 11.1 SD 1.3                                   | 1983-1989 | X                                  | SensorMedics (Yorba Linda, CA), 922 dry, rolling seal spirometer                                                 | Expressed as a percentage predicted <sup>X</sup>                                    |
| <b>Korhonen<sup>E16</sup><br/>Finland</b>  | No BPD group (21m 13F)<br>Control group X     | No BPD group mean 29 SD 2,<br>range 25-35<br>Control group term | No BPD group mean 1132 SD 235, range 605-1490                            | No BPD group 23/34 ventilated duration median 3, range 0-44 days     | No BPD group median 7.1 range 6.9-8.1 years<br>Control group median 7.2, range 6.9-8.3 | 1990-1994 | No BPD group 8/34 received         | Flow volume spirometry were recorded by mass flow sensor (2200/Vmax 22, SensorMedics BV, Bilthoven, Netherlands) | Finish FVS reference values for children were used <sup>E43</sup> .                 |
| <b>Baraldi<sup>E17</sup><br/>Italy</b>     | VLBW (6M, 9F)                                 | VLBW mean 32.1 SD 3.0<br>range 28-37                            | VLBW mean 1287 SD 143<br>range 1000-1500                                 | 7/15 duration 1-8 days                                               | VLBW mean 9.9 SD 1.8<br>range 7.8-12.2                                                 | 1976-1979 | X                                  | 101 water spirometer (Biomedin, Padova, Italy)                                                                   | Expressed as percentage of reference values <sup>E35</sup>                          |
| <b>Baraldi<sup>E18</sup><br/>Italy</b>     | No BPD group (14M, 17F)                       | No BPD group mean 28.9 SEM 0.4                                  | No BPD group mean 965 SEM 40                                             | No BPD group 13/31 mean 2.6 days SEM                                 | No BPD group mean 8.7 SEM 0.3,                                                         | 1990-1994 | No BPD group 7/31<br>Control group | Flow volume spirometry (Biomedin, Padova, Italy)                                                                 | Lung function as percentage of predicted values for                                 |

|                                            |                                                 |                                                                                          |                                                                                                 |                                                                                               |                                                                                 |           |                      |                                                                                                                                                     |                                                                                                |
|--------------------------------------------|-------------------------------------------------|------------------------------------------------------------------------------------------|-------------------------------------------------------------------------------------------------|-----------------------------------------------------------------------------------------------|---------------------------------------------------------------------------------|-----------|----------------------|-----------------------------------------------------------------------------------------------------------------------------------------------------|------------------------------------------------------------------------------------------------|
|                                            | Control group (14M, 17F)                        | Control group term                                                                       | Control group X                                                                                 | 0.7 days Controls X                                                                           | Controls mean 8.4 SEM 0.4.                                                      |           | X                    |                                                                                                                                                     | height and sex <sup>E32</sup>                                                                  |
| <b>Barker<sup>E19</sup><br/>Germany</b>    | No BPD group (5M, 8F)<br>Control group (8M, 5F) | No BPD group mean 33.5, range 30-36, control group term                                  | No BPD group mean 1264, range 900-1490, Control group X                                         | No BPD group mean 2.1 days, range 0-13, control group X                                       | No BPD group mean 10.4 years (range 8-14), control group mean 10.5 years (8-12) | 1983-1989 | X                    | Baseline lung function was measured by standard spirometry and performed additional body plethysmography (Jaeger Body Screen II, Wurzburg, Germany) | Lung function as percentage predicted <sup>X</sup>                                             |
| <b>Mieskonen<sup>E20</sup><br/>Finland</b> | No BPD group (6M, 12F)<br>Control group X       | No BPD group median 27.6, range 25.3-30.9, Controls term                                 | No BPD group median 960, range 727-1575<br>Controls X                                           | 39/40 PT children ventilated, No BPD group median 12 days range 1-39                          | No BPD group median 8.0 range 7.5-9.2<br>Controls median 8.9 range 5.3-11.2     | 1989-1991 | X                    | Spirotrac III, Vitalograph Ltd, Buckingham, UK)                                                                                                     | Expressed as percentage predicted <sup>E35</sup>                                               |
| <b>Pianosi<sup>E21</sup><br/>Canada</b>    | Non BPD group (9M, 6F)<br>Controls X            | CMV non BPD median 29, IQR 28,30<br>HFV non BPD median 29.5 IQR 27.5, 31<br>Control term | CMV non BPD median 1140, IQR 1045, 1280<br>HFV non BPD median 1400, IQR 1038, 1765<br>Control X | CMV non BPD median 5.5 days, IQR 5,19<br>HFV non BPD median 11 days, IQR 6.5, 25<br>Control X | 8-9                                                                             | 1986-1987 | X                    | Spirometry measured in 6200 Autobox, Sensormedics, Yorba Linda CA                                                                                   | Results were expressed as percentage predicted using reference values <sup>E32, E44, E45</sup> |
| <b>Palta<sup>E22</sup><br/>USA</b>         | No BPD 49% M                                    | No BPD group mean                                                                        | No BPD group mean                                                                               | X                                                                                             | All VLBW mean 10.4                                                              | 1988-1991 | Not given for no BPD | Jaeger AM1 portable electronic peak flow                                                                                                            | Expressed as percentage predicted                                                              |

|                                                        |                                                                |                                                                                                                          |                                                                                                                     |                                                                                                              |                                                                                                                                              |                     |      |                                                                   |                                                                                                                                            |
|--------------------------------------------------------|----------------------------------------------------------------|--------------------------------------------------------------------------------------------------------------------------|---------------------------------------------------------------------------------------------------------------------|--------------------------------------------------------------------------------------------------------------|----------------------------------------------------------------------------------------------------------------------------------------------|---------------------|------|-------------------------------------------------------------------|--------------------------------------------------------------------------------------------------------------------------------------------|
|                                                        | Controls<br>56%                                                | 30 SD 2.5,<br>Controls X                                                                                                 | 1178 SD 228<br>Controls X                                                                                           |                                                                                                              | SD 0.42,<br>controls<br>mean 9.6 SD<br>0.72                                                                                                  |                     |      | meter                                                             | ratios <sup>E46</sup>                                                                                                                      |
| <b>Mitchell<sup>E23</sup><br/>USA</b>                  | No BPD<br>group (6M,<br>4F)<br>Control<br>group (4M,<br>6F)    | No BPD<br>group mean<br>31, SD 3,<br>Control<br>group mean<br>40, SD 1                                                   | No BPD<br>group mean<br>1421, SD<br>411 Control<br>group mean<br>3157, SD<br>606                                    | no BPD X,<br>Control group<br>X                                                                              | No BPD<br>group mean<br>7, SD 1,<br>Term group<br>mean 7, SD 1                                                                               | 1985-<br>1987       | X    | Spirometry with a<br>calibrated spirometer<br>(SensorMedics 2200) | Results as percentage<br>predicted based on<br>height, gender and<br>race using the<br>standard equation <sup>E41,</sup><br><sup>E42</sup> |
| <b>Vrijlandt<sup>E24</sup><br/>The<br/>Netherlands</b> | No BPD<br>group<br>(12M, 0F)<br>Control<br>group<br>(16M, 32F) | Whole PT<br>group<br>including no<br>BPD group<br>mean 30 SD<br>2, range 26-<br>36, Control<br>group term<br>range 37-42 | Whole PT<br>group<br>including no<br>BPD group<br>mean 1246<br>SD 232,<br>range 720-<br>1750,<br>Control<br>group X | Whole PT<br>group<br>including no<br>BPD group<br>mean 6.3 days<br>SD 12, range 0-<br>51, Control<br>group X | Whole PT<br>group<br>including no<br>BPD group<br>mean 19 SD<br>0.3, range<br>19-20,<br>Control<br>group mean<br>20.8 SD 1.2,<br>range 18-22 | PT<br>group<br>1983 | 0/42 | Spirometry using a<br>pneumotachograph                            | Results as percentage<br>predicted based on<br>height <sup>E47</sup>                                                                       |
| <b>Wheeler<sup>E25</sup><br/>X</b>                     | X                                                              | X                                                                                                                        | PT group<br>mean 1506,<br>SD<br>435, Control<br>group mean<br>3540, SD<br>570                                       | X                                                                                                            | PT group<br>mean 7.3, SD<br>0.6, Control<br>group mean<br>8.3, SD 0.9                                                                        | X                   | X    | X                                                                 | Results as percentage<br>predicted <sup>X</sup>                                                                                            |
| <b>Abreu<sup>E26</sup><br/>Brazil</b>                  | PT group<br>(8M, 5F)<br>Control                                | PT group<br>mean 35 SD<br>2.3 range                                                                                      | PT group<br>mean 1765<br>SD 621                                                                                     | PT group mean<br>1 SD 2 range 0-<br>6                                                                        | PT group<br>mean 8.3 SD<br>1.11, Control                                                                                                     | 1993-<br>1996       | X    | SpiroCard PC Card<br>Flux spirometer (QRS<br>Diagnostic-Plymouth, | Expressed as<br>percentage predicted<br><sup>E35</sup>                                                                                     |

|                                                                                  |                                       |                                                                    |                                                               |                                                                                           |                                                                                            |           |                    |                                                                                                         |                                                                      |
|----------------------------------------------------------------------------------|---------------------------------------|--------------------------------------------------------------------|---------------------------------------------------------------|-------------------------------------------------------------------------------------------|--------------------------------------------------------------------------------------------|-----------|--------------------|---------------------------------------------------------------------------------------------------------|----------------------------------------------------------------------|
|                                                                                  | group (9M, 11F)                       | 28-36 Control group term                                           | range 850-2800 Control group X                                | Control group X                                                                           | mean 8.2 SD 1.14                                                                           |           |                    | USA)                                                                                                    |                                                                      |
| <b>Guimaraes<sup>E27</sup><br/>X<br/>(Data as Medians in paper)</b>              | No BPD group (24M, 40F)               | No BPD group median 30 range 26-35, mean 29.9 SD 2.4               | No BPD group median 1210 range 655-1500, mean 1162 SD 875     | No BPD group 55/64 ventilated median 10 days range 0-72, mean 15.72 SD 16.6               | No BPD group median 92 months range 69-105 mean 84.7 SD 13.2                               | 2002-2004 | X                  | Compact Vitalograph, Buckingham, UK                                                                     | Expressed as percentage predicted <sup>E35</sup>                     |
| <b>Hakulinen<sup>E28</sup><br/>Finland<br/>(Data as Medians in paper)</b>        | Non BPD group (4M,7F) Control group X | Non BPD group mean 28.4 SD 2.4 range 26.7-35.0, Control group term | Non BPD group mean 992 SD 136 range 810-1240, Control group X | Non BPD group duration of ventilator treatment median 9 days, range 0-26, Control group X | Non BPD group mean 9.4 SD 1.2 range 7.5-11.2, Control group mean 8.6 SD 1.1 range 7.1-11.2 | 1978-1985 | X                  | Flow/volume spirometry with a wedge-bellows-type dynamic spirometer (Vitalograph PS II, Birmingham, UK) | Expressed as percentage predicted <sup>E44, E35, E48, E49, E50</sup> |
| <b>Berggren Brostrom<sup>E29</sup><br/>Sweden<br/>(Data as Medians in paper)</b> | X                                     | Non BPD group median 30, range 28-31                               | Non BPD group median 1495, range 845-2094                     | Duration of ventilatory therapy days non BPD group median 0, range 0-5                    | non BPD group median 91 months, range 78-97                                                | 1992-1997 | Non BPD group 1/28 | Pneumotachograph (Vitalograph)                                                                          | Expressed as percentage predicted <sup>E35</sup>                     |

**Table E1c:- Lung function outcomes of the included articles preterm group (no BPD) compared to term control group**

| STUDY                        | FEV <sub>1</sub> PREDICTED                                                          | FVC PREDICTED                                                       | FEF <sub>25-75</sub> PREDICTED                                      | RATIOS                                                                                     | TLC                                                                    | RV                                                                       | DLCO                             |
|------------------------------|-------------------------------------------------------------------------------------|---------------------------------------------------------------------|---------------------------------------------------------------------|--------------------------------------------------------------------------------------------|------------------------------------------------------------------------|--------------------------------------------------------------------------|----------------------------------|
| Fawke <sup>E1</sup>          | No BPD mean 90<br>SD 15,<br>Controls mean 100<br>SD 12                              | No BPD mean 97<br>SD 13,<br>Controls mean 102<br>SD 12              | No BPD mean 71<br>SD 25,<br>Controls mean 90 SD<br>23               | FEV <sub>1</sub> /FVC<br>No BPD mean 92<br>SD 11,<br>Controls mean 98<br>SD 8              | X                                                                      | X                                                                        | X                                |
| Arad <sup>E2</sup>           | PT group mean 82.6<br>SD 10.8                                                       | X                                                                   | X                                                                   | X                                                                                          | X                                                                      | X                                                                        | X                                |
| De Kleine <sup>E3</sup>      | Non BPD and non<br>ventilated mean<br>90.34<br>SD 16.2,<br>Control mean 95<br>SD 12 | X                                                                   | X                                                                   | X                                                                                          | X                                                                      | X                                                                        | X                                |
| Doyle <sup>E4</sup>          | No BPD mean 96.7<br>SD 12.6,<br>NBW mean 104.6<br>SD 13.2                           | No BPD mean 101.4<br>SD 12.0<br>NBW mean 104.8<br>SD 12.0           | No BPD mean 83.5<br>SD 23.8<br>NBW mean 99.1<br>SD 23.4             | FEV <sub>1</sub> /FVC<br>No BPD mean 84.2<br>SD 8.8<br>NBW mean 87.0<br>SD 7.0             | No BPD mean<br>99.3<br>SD 14.2<br>NBW mean<br>102.5<br>SD 13.9         | No BPD mean<br>112.8<br>SD 37.6<br>NBW mean<br>117.4<br>SD 30.8          | X                                |
| Kulasekaran <sup>E5</sup>    | PT group mean 87.3<br>SD 12.0                                                       | PT group mean 92.1<br>SD 11.8                                       | PT group mean 81.1<br>SD 20.5                                       | FEV <sub>1</sub> /FVC<br>PT group mean<br>86.6<br>SD 5.7                                   | PT group mean<br>95.0 SD 11.9                                          | PT group mean<br>100.7<br>SD 44.3                                        | PT group mean<br>82.6<br>SD 11.7 |
| Doyle <sup>E6</sup>          | No BPD group mean<br>87.1 SD 11.5,<br>Control group 97.9<br>SD 11.8                 | No BPD group mean<br>88.0 SD 12.9,<br>Control group 95.2<br>SD 12.6 | No BPD group mean<br>67.9 SD 22.1,<br>Control group 85.6<br>SD 20.2 | FEV <sub>1</sub> /FVC<br>No BPD group<br>mean 88.7 SD 9.0,<br>Control group 91.4<br>SD 6.6 | No BPD group<br>mean 95.1 SD<br>13.8,<br>Control group<br>98.5 SD 11.7 | No BPD group<br>mean 122.9 SD<br>43.7,<br>Control group<br>112.2 SD 34.2 | X                                |
| Galdes-Sebaldt <sup>E7</sup> | <1500g no HMD                                                                       | X                                                                   | <1500g no HMD                                                       | X                                                                                          | X                                                                      | X                                                                        | <1500g no                        |

|                                  |                                                                                        |                                                            |                                                                                         |                                                                |                                                            |                                                           |                                                                                         |
|----------------------------------|----------------------------------------------------------------------------------------|------------------------------------------------------------|-----------------------------------------------------------------------------------------|----------------------------------------------------------------|------------------------------------------------------------|-----------------------------------------------------------|-----------------------------------------------------------------------------------------|
|                                  | group mean 82 SEM 2,<br><1500g HMD group mean 83 SEM 2,<br>control group mean 92 SEM 1 |                                                            | group mean 82 SEM 4,<br><1500g HMD group mean 90 SEM 7,<br>control group mean 104 SEM 3 |                                                                |                                                            |                                                           | HMD group mean 87 SEM 3,<br><1500g HMD group mean 97 SEM 4, control group mean 99 SEM 3 |
| <b>Giacoia</b> <sup>E8</sup>     | PT group mean 85.9 SEM 6.3, Control group Mean 97.2, SEM 4.6                           | X                                                          | PT group mean 66.27 SEM 10.3, Control group mean 88.5 SEM 7.1                           | X                                                              | X                                                          | X                                                         | X                                                                                       |
| <b>Gross</b> <sup>E9</sup>       | No BPD group mean 98 SD 18, Control group mean 97 SD 12                                | No BPD group mean 104 SD 15, Control group mean 103 SD 11  | No BPD group mean 84 SD 27, Control group mean 88 SD 21                                 | X                                                              | No BPD group mean 111 SD 16, Control group mean 106 SD 13  | No BPD group mean 130 SD 51, Control group mean 112 SD 38 | X                                                                                       |
| <b>Halvorsen</b> <sup>E10</sup>  | No BPD mean 94.7 SD 11.2<br>Control 98.6 SD 9.9                                        | X                                                          | X                                                                                       | X                                                              | X                                                          | X                                                         | X                                                                                       |
| <b>Smith</b> <sup>E11</sup>      | No BPD mean 87 SD 12.1                                                                 | No BPD mean 98                                             | No BPD mean 75                                                                          | X                                                              | X                                                          | X                                                         | X                                                                                       |
| <b>Jacob</b> <sup>E12, E13</sup> | No BPD mean 85.1 SD 10.8,<br>Control mean 94.3 SD 8.3                                  | No BPD mean 93.7 SD 8.3,<br>Control mean 99.1 SD 9.4       | No BPD mean 78.7 SD 22.7,<br>Control X                                                  | FEV <sub>1</sub> /FVC<br>No BPD mean 84.1 SD 7.7,<br>Control X | No BPD mean 97.1 SD 7.5,<br>Control X                      | No BPD mean 114.8 SD 20.2,<br>Control X                   | No BPD mean 92.4 SD 13.0,<br>Control mean 100.7 SD 17.1                                 |
| <b>Kennedy</b> <sup>E14</sup>    | No BPD group mean 95.4 SD 11.4<br>Control group mean 102.1                             | No BPD group mean 101.2 SD 9.5<br>Control group mean 104.2 | No BPD group mean 75.5 SD 22.1<br>Control group mean 90.7                               | X                                                              | No BPD group mean 100.2 SD 12.7<br>Control group mean 98.3 | X                                                         | X                                                                                       |



|                                 |                                                                                             |                                                                                              |                                                                        |                                                                                                                     |                                                                                              |                                                                                     |                                                                                              |
|---------------------------------|---------------------------------------------------------------------------------------------|----------------------------------------------------------------------------------------------|------------------------------------------------------------------------|---------------------------------------------------------------------------------------------------------------------|----------------------------------------------------------------------------------------------|-------------------------------------------------------------------------------------|----------------------------------------------------------------------------------------------|
|                                 | SD 10.2                                                                                     | SD 9.6                                                                                       | SD 21.8                                                                |                                                                                                                     | SD 10.8                                                                                      |                                                                                     |                                                                                              |
| <b>Kilbride</b> <sup>E15</sup>  | No BPD mean 89 SD 13<br>Control group mean 91 SD 9                                          | No BPD mean 94 SD 14<br>Control group mean 96 SD 11                                          | No BPD mean 92 SD 22<br>Control group mean 100 SD 17                   | FEV <sub>1</sub> /FVC<br>No BPD mean 89 SD 6<br>Control group mean 89 SD 5                                          | X                                                                                            | X                                                                                   | X                                                                                            |
| <b>Korhonen</b> <sup>E16</sup>  | No BPD group mean 95<br>SD 14, range 68-127<br>Control group mean 99<br>SD 11, range 72-117 | No BPD group mean 100<br>SD 16, range 72-142<br>Control group mean 102<br>SD 8, range 83-117 | X                                                                      | FEV <sub>1</sub> /FVC<br>No BPD group mean 91<br>SD 10, range 69-109<br>Control group mean 92<br>SD 7, range 78-104 | No BPD group mean 110<br>SD 14, range 89-145<br>Control group mean 107<br>SD 8, range 93-128 | No BPD group median 148<br>range 71-353<br>Control group median 132<br>range 60-214 | No BPD group mean 91<br>SD 13, range 68-117<br>Control group mean 101<br>SD 15, range 71-138 |
| <b>Baraldi</b> <sup>E17</sup>   | VLBW mean 94.2 SD 8.9                                                                       | VLBW mean 92.8 SD 8.1                                                                        | VLBW mean 103.4 SD 23.5                                                | X                                                                                                                   | X                                                                                            | X                                                                                   | X                                                                                            |
| <b>Baraldi</b> <sup>E18</sup>   | No BPD group mean 90.3<br>SD 15.6<br>Control group mean 100.1<br>SD 12.8                    | No BPD group mean 96.2<br>SEM 2.2<br>Control group mean 101.7<br>SEM 2.5                     | No BPD group mean 83<br>SEM 5.6<br>Control group mean 110.9<br>SEM 5.1 | FEV <sub>1</sub> /FVC<br>No BPD group mean 84.3<br>SEM 5.6<br>Control group mean 89.4<br>SEM 1                      | X                                                                                            | X                                                                                   | X                                                                                            |
| <b>Barker</b> <sup>E19</sup>    | No BPD group mean 101<br>SD 15<br>Control group mean 106<br>SD 11                           | No BPD group mean 92<br>SD 14<br>Control group mean 97<br>SD 6                               | X                                                                      | X                                                                                                                   | X                                                                                            | X                                                                                   | X                                                                                            |
| <b>Mieskonen</b> <sup>E20</sup> | No BPD group mean 89.8 SD 13, Control group 101.7 SD 8.4                                    | No BPD group mean 94.0 SD 9.2 Control group 104.5 SD 10.9                                    | X                                                                      | X                                                                                                                   | X                                                                                            | X                                                                                   | No BPD group mean 89.0 SD 10.0, Control group 99.5 SD                                        |

|                                |                                                                                |                                                                                |                                                                       |                                                                                                        |                                                                               |                                                                                |                                                                              |
|--------------------------------|--------------------------------------------------------------------------------|--------------------------------------------------------------------------------|-----------------------------------------------------------------------|--------------------------------------------------------------------------------------------------------|-------------------------------------------------------------------------------|--------------------------------------------------------------------------------|------------------------------------------------------------------------------|
|                                |                                                                                |                                                                                |                                                                       |                                                                                                        |                                                                               |                                                                                | 11.6                                                                         |
| <b>Pianos<sup>E21</sup></b>    | No BPD group mean<br>83<br>SD 13<br>Control group mean<br>90<br>SD 8           | No BPD group mean<br>95<br>SD 12<br>Control group mean<br>96<br>SD 9           | No BPD group mean<br>68<br>SD 20<br>Control group mean<br>86<br>SD 12 | X                                                                                                      | No BPD group<br>mean 103<br>SD 11<br>Control group<br>mean 97<br>SD 10        | No BPD group<br>mean 137<br>SD 50<br>Control group<br>mean 102<br>SD 26        | No BPD group<br>mean 117<br>SD 26<br>Control group<br>mean 109<br>SD 20      |
| <b>Palta<sup>E22</sup></b>     | No BPD group mean<br>88 SD 14<br>Control group mean<br>97 SD 12                | BPD group mean 87<br>SD 43<br>Control group mean<br>99 SD 27                   | X                                                                     | X                                                                                                      | X                                                                             | X                                                                              | X                                                                            |
| <b>Mitchell<sup>E23</sup></b>  | No BPD group mean<br>85<br>SD 15<br>Control group mean<br>91<br>SD 14          | No BPD group mean<br>95<br>SD 12<br>Control group mean<br>93<br>SD 15          | No BPD group mean<br>95<br>SD 12<br>Control group mean<br>87<br>SD 24 | FEV <sub>1</sub> /FVC<br>No BPD group<br>mean 0.80<br>SD 0.07<br>Control group<br>mean 0.88<br>SD 0.05 | X                                                                             | X                                                                              | No BPD group<br>mean 80 SE 4,<br>Control group<br>mean 100 SE 3              |
| <b>Vrijlandt<sup>E24</sup></b> | No BPD group mean<br>99.2<br>SD 17.9<br>Control group mean<br>109.6<br>SD 13.4 | No BPD group mean<br>99.2<br>SD 13.7<br>Control group mean<br>106.0<br>SD 10.8 | X                                                                     | FEV <sub>1</sub> /FVC<br>No BPD group<br>mean 82.5<br>SD 11.1<br>Control group<br>mean 87.4<br>SD 6.6  | No BPD group<br>mean 102.5<br>SD 8.3<br>Control group<br>mean 103.3<br>SD 9.7 | No BPD group<br>mean 111.2<br>SD 29.1<br>Control group<br>mean 90.3<br>SD 25.3 | No BPD group<br>mean 94.5<br>SD 18.0<br>Control group<br>mean 96.3<br>SD 9.9 |
| <b>Wheeler<sup>E25</sup></b>   | PT group mean 106<br>SD 17<br>Control group mean<br>104<br>SD 15               | X                                                                              | BPD group mean 90<br>SD 21<br>Control group mean<br>103<br>SD 21      | X                                                                                                      | BPD group<br>mean 101<br>SD 16<br>Control group<br>mean 111<br>SD 34          | X                                                                              | X                                                                            |
| <b>Abreu<sup>E26</sup></b>     | PT group mean 100<br>SD 14, Control group                                      | X                                                                              | X                                                                     | X                                                                                                      | X                                                                             | X                                                                              | X                                                                            |

|                                                                          |                                                                                              |                                                                                                              |                                               |                                                                                                                                         |                                                                                                                      |                                                                                                                 |                                                                                                                 |
|--------------------------------------------------------------------------|----------------------------------------------------------------------------------------------|--------------------------------------------------------------------------------------------------------------|-----------------------------------------------|-----------------------------------------------------------------------------------------------------------------------------------------|----------------------------------------------------------------------------------------------------------------------|-----------------------------------------------------------------------------------------------------------------|-----------------------------------------------------------------------------------------------------------------|
|                                                                          | mean 102 SD 15                                                                               |                                                                                                              |                                               |                                                                                                                                         |                                                                                                                      |                                                                                                                 |                                                                                                                 |
| <b>Guimaraes<sup>E27</sup></b><br>(Data as Medians in paper)             | No BPD group<br>median 89 extremes<br>48-124                                                 | No BPD group<br>median 91 extremes<br>56-117                                                                 | No BPD group<br>median 97 extremes<br>5-223   | FEV <sub>1</sub> /FVC<br>No BPD group<br>median 6 extremes<br>1-43                                                                      | X                                                                                                                    | X                                                                                                               | X                                                                                                               |
| <b>Hakulinen<sup>E28</sup></b><br>(Data as Medians in paper)             | Non BPD group<br>median 93, range 47-<br>120<br>Control group<br>median 99, range 88-<br>119 | Non BPD group<br>median 96.6, SE 6.1<br>range 89-104<br>Control group<br>median 98.6, SE 2.2<br>range 93-104 | X                                             | FEV <sub>1</sub> /FVC<br>Non BPD group<br>median 94.9, SE 2.5<br>range 90-100<br>Control group<br>median 102.9, SE<br>1.5 range 100-106 | Non BPD group<br>median 95.7, SE<br>3.9 range 89-<br>102<br>Control group<br>median 99.7, SE<br>2.3 range 95-<br>104 | Non BPD group<br>median 82.3, SE<br>6.0 range 66-<br>101<br>Control group<br>median 84.0, SE<br>6.4 range 71-97 | Non BPD group<br>median 89.5, SE<br>3.4 range 82-97<br>Control group<br>median 100.7,<br>SE 2.2 range<br>95-106 |
| <b>Berggren<br/>Brostrom<sup>E29</sup></b><br>(Data as Medians in paper) | Non BPD group<br>median 95.4, min<br>max 75-111                                              | Non BPD group<br>median 98, min max<br>78-129                                                                | Non BPD group<br>median 93, min max<br>44-123 | Given in litres                                                                                                                         | X                                                                                                                    | X                                                                                                               | X                                                                                                               |

**Table E2a:- Description of the included articles BPD group (supplemental oxygen dependency for at least 28 days from birth) compared to term control group**

| STUDY                         | QUALITY SCORE | OBJECTIVE                                                                             | STUDY DESIGN    | STUDY GROUP                       | CONTROL GROUP                                | OUTCOME MEASURES                                                                    |
|-------------------------------|---------------|---------------------------------------------------------------------------------------|-----------------|-----------------------------------|----------------------------------------------|-------------------------------------------------------------------------------------|
| <b>De Kleine<sup>E3</sup></b> | 18            | Examine the effect of lung injury caused by IPPV for HMD on lung function in children | Follow up study | 40 PT ventilated for HMD (11 BPD) | 39 randomly selected pupils of a similar age | Spirometry<br>Respiratory symptoms questionnaire<br>Review of follow up records for |

|                                |    |                                                                                                                                                                                                                                          |                                            |                                                                                    |                                                                            |                                                                                                                                                 |
|--------------------------------|----|------------------------------------------------------------------------------------------------------------------------------------------------------------------------------------------------------------------------------------------|--------------------------------------------|------------------------------------------------------------------------------------|----------------------------------------------------------------------------|-------------------------------------------------------------------------------------------------------------------------------------------------|
| <b>Doyle<sup>E4</sup></b>      | 19 | To determine the respiratory health of children of birthweight <1501g, compared to NBW controls in adolescence                                                                                                                           | Cohort study                               | 180 VLBW (<1501g) -39 BPD with spirometry results                                  | 42 NBW (>2499g), 39 with spirometry results                                | Spirometry<br>Assessment of respiratory health                                                                                                  |
| <b>Halvorsen<sup>E10</sup></b> | 15 | To investigate long term outcomes in young people after extremely preterm birth and BPD                                                                                                                                                  | Population-based long-term follow-up study | 2 population based cohorts ≤ 28 weeks gestation or ≤ 1000g birthweight 62 with BPD | 81 term controls birth weight between 3 and 4 kg                           | Spirometry<br>ISAAC questionnaire<br>Metacholine provocation test<br>Exercise induced asthma and reversibility to salbutamol<br>Allergy testing |
| <b>Bader<sup>E51</sup></b>     | 12 | To determine the long-term pulmonary sequelae and effect on exercise tolerance of BPD                                                                                                                                                    | Area cohort study                          | 10 BPD                                                                             | 8 age matched term children                                                | Spirometry<br>Exercise testing<br>Recent medical history                                                                                        |
| <b>Karila<sup>E52</sup></b>    | 7  | To confirm children who have survived BPD display lower ventilation during exercise than healthy children, and to determine whether alveolar hypoventilation associated with exercise induced hypoventilation occurred in these children | Prospective study                          | 20 BPD                                                                             | 18 healthy term matched controls                                           | Spirometry<br>Exercise testing                                                                                                                  |
| <b>Kennedy<sup>E14</sup></b>   | 15 | To assess the importance of the contributions of birth weight, gestational age, neonatal respiratory illness, and its treatment on subsequent childhood                                                                                  | Cohort study                               | VLBW cohort (<1500g) 26 BPD                                                        | 82 control children , 1 birth weight <2kg, 2 born at 36 weeks rest at term | Spirometry<br>Respiratory questionnaire                                                                                                         |

|                                   |    |                                                                                                                                                                                                                           |                                |                                                                |                                                                     |                                                                                  |
|-----------------------------------|----|---------------------------------------------------------------------------------------------------------------------------------------------------------------------------------------------------------------------------|--------------------------------|----------------------------------------------------------------|---------------------------------------------------------------------|----------------------------------------------------------------------------------|
|                                   |    | lung function in a cohort of children of birth weight less than 1500g.                                                                                                                                                    |                                |                                                                |                                                                     |                                                                                  |
| <b>Korhonen</b> <sup>E16</sup>    | 16 | To assess respiratory outcome and its predictors during the surfactant era in VLBW schoolchildren with and without BPD                                                                                                    | Cohort                         | VLBW cohort (<1500g) 34 BPD of which 29 had spirometry results | 34 term controls of which 33 had spirometry results                 | Spirometry<br>Mailed questionnaire<br>Atopic tendency testing                    |
| <b>Koumbourlis</b> <sup>E53</sup> | 8  | To investigate whether early lung function abnormalities in PT children with BPD improve in late childhood and adolescence                                                                                                | Prospective longitudinal study | 17 BPD, PT birth ≤ 32 weeks, birth weight ≤ 1500g              | X                                                                   | Spirometry<br>Histamine challenge<br>Questionnaire                               |
| <b>Baraldi</b> <sup>E18</sup>     | 11 | To measure exhaled nitric oxide and lung function in a group of school-age survivors of BPD.                                                                                                                              | Cohort study                   | 31 BPD, PT <31 weeks, birth weight <2000g                      | 31 healthy children born at term matched for sex and age            | Spirometry<br>Reversibility to β <sub>2</sub> -Agonists<br>Allergometric study   |
| <b>Barker</b> <sup>E19</sup>      | 16 | To assess the long-term outcome in respiratory morbidity, lung function, submaximal, and peak exercise capacity among a local cohort of school children with a history of treatment in a NICU after preterm birth at VLBW | Area cohort study              | 13 BPD, VLBW birth weight < 1500g, PT birth <37 weeks          | 13 healthy children born at term matched for age, height and weight | Spirometry<br>Interview on respiratory history and morbidity<br>Exercise testing |
| <b>Santuz</b> <sup>E54</sup>      | 11 | To evaluate the lung function of BPD children at school age and to assess the level of                                                                                                                                    | Cohort study                   | 12 BPD                                                         | 16 healthy controls matched in age, height,                         | Spirometry<br>Exercise testing<br>Questionnaire                                  |

|                                 |    |                                                                                                                                                                                       |                            |                                                 |                                        |                                                                                       |
|---------------------------------|----|---------------------------------------------------------------------------------------------------------------------------------------------------------------------------------------|----------------------------|-------------------------------------------------|----------------------------------------|---------------------------------------------------------------------------------------|
|                                 |    | exercise tolerance of BPD survivors by comparing ventilation and gas exchange during exercise of BPD and healthy children                                                             |                            |                                                 | weight and level of physical activity  |                                                                                       |
| <b>Pianosi</b> <sup>E21</sup>   | 10 | To assess the hypothesis that there would be no significant difference in childhood lung function between patients who were ventilated by conventional or high frequency ventilation. | Cohort study               | 17 BPD                                          | 15 term born matched controls          | Spirometry<br>Bronchodilator responsiveness                                           |
| <b>Northway</b> <sup>E55</sup>  | 12 | To test the hypothesis that the pulmonary function of adolescents and young adults who had BPD in infancy was normal                                                                  | Retrospective cohort study | 26 BPD                                          | 53 age matched term subjects           | Spirometry<br>Cardiorespiratory history<br>Bronchial hyperreactivity<br>Atopic status |
| <b>Ng</b> <sup>E56</sup>        | 7  | To assess the prevalence of asthma in children born in the 1990s who had survived BPD                                                                                                 | Retrospective cohort study | 55 BPD children but only 7 performed spirometry | X                                      | Spirometry<br>Airway hyperresponsiveness<br>Rates of asthma                           |
| <b>Mitchel</b> <sup>E23</sup>   | 11 | To test the hypothesis that gas transfer during exercise is reduced in survivors of BPD relative to age-matched control subjects                                                      | Cohort study               | 10 BPD                                          | 10 similar age born full term controls | Spirometry<br>Exercise testing<br>Questionnaire                                       |
| <b>Vrijlandt</b> <sup>E24</sup> | 14 | To investigate the long term effects of prematurity on lung                                                                                                                           | Prospective cohort study   | 8 BPD (gestational age <32 weeks and/or         | 48 healthy term controls               | Spirometry<br>Exercise testing                                                        |

|                                                               |                             |                                                                                                                                        |                            |                                               |                                     |                                                                                           |
|---------------------------------------------------------------|-----------------------------|----------------------------------------------------------------------------------------------------------------------------------------|----------------------------|-----------------------------------------------|-------------------------------------|-------------------------------------------------------------------------------------------|
|                                                               |                             | function and exercise capacity                                                                                                         |                            | birthweight under 1500g)                      |                                     |                                                                                           |
| <b>Smyth</b> <sup>E57</sup>                                   | 7                           | To assess lung function of children with BPD                                                                                           | Cohort study               | 9 BPD                                         | X                                   | Spirometry<br>Bronchial hyperreactivity<br>Allergy testing                                |
| <b>Wheeler</b> <sup>E25</sup>                                 | 7                           | To assess and compare lung function in BPD, RDS, PT and term children                                                                  | Case control study         | 11 BPD                                        | 11 normal term delivery children    | Spirometry                                                                                |
| <b>Ahrens</b> <sup>E58</sup>                                  | Not recorded in translation | To study the long term pulmonary and allergic outcomes of very low birth weight prematures with and without bronchopulmonary dysplasia | Cohort study               | 19 BPD<br>VLBW <1500g, PT <34 weeks gestation | 9 term children                     | Spirometry<br>Skin Prick Testing<br>Chest X-ray<br>Plethysmography<br>Histamine challenge |
| <b>Abreu</b> <sup>E26</sup>                                   | 14                          | To investigate cardio respiratory capacity and investigate the presence of exercise-induced bronchospasm among children with BPD       | Case control study         | 13 BPD                                        | 20 term children 17 with LF results | Spirometry<br>Exercise testing                                                            |
| <b>Hakulinen</b> <sup>E28</sup><br>(Data as Medians in paper) | 13                          | To determine the extent to which BPD affects the diffusing properties of lung tissue in childhood.                                     | Cohort study               | 20 PT children <1250g had BPD                 | 20 healthy term children            | Spirometry<br>Questionnaire                                                               |
| <b>Blayney</b> <sup>E59</sup><br>(Data as Medians in paper)   | 7                           | To evaluate the natural history of BPD                                                                                                 | Cohort study               | 32 children with BPD                          | X                                   | Spirometry<br>Questionnaire                                                               |
| <b>Aquino</b> <sup>E60</sup><br>(Data as Medians in paper)    | 9                           | To correlate high-resolution inspiratory and expiratory CT findings with pulmonary function                                            | Retrospective cohort study | 26 children with BPD                          | X                                   | Spirometry<br>CT                                                                          |

|                                                                             |   |                                                                                   |        |                                               |   |                                                                                                         |
|-----------------------------------------------------------------------------|---|-----------------------------------------------------------------------------------|--------|-----------------------------------------------|---|---------------------------------------------------------------------------------------------------------|
|                                                                             |   | results in older children and adults who have BPD                                 |        |                                               |   |                                                                                                         |
| <b>Berggren Brostrom<sup>E29</sup></b><br><b>(Data as Medians in paper)</b> | 8 | To examine the impact of the severity of BPD on pulmonary morbidity at school age | Cohort | 60 VLBW children<br>28 with mild/moderate BPD | X | Spirometry<br>Oscillometry<br>Thoracic HRCT<br>Allergy skin-prick test<br>Blood sample<br>questionnaire |

**Table E2b:- Demographics of the included articles BPD group (supplemental oxygen dependency for at least 28 days from birth) compared to term control group**

| STUDY COUNTRY                                           | SUBJECTS (GENDER)                                                | GA (WEEKS)                                                                           | BW (GRAMS)                                                                           | DURATION ON MECHANICAL VENTILATION (DAYS)      | AGE TESTED (YEARS)                                                                    | YEAR OF BIRTH | SURFACTANT GIVEN | METHOD OF MEASURING LUNG FUNCTION                                  | METHOD OF STANDARDISING LUNG FUNCTION MEASUREMENTS                              |
|---------------------------------------------------------|------------------------------------------------------------------|--------------------------------------------------------------------------------------|--------------------------------------------------------------------------------------|------------------------------------------------|---------------------------------------------------------------------------------------|---------------|------------------|--------------------------------------------------------------------|---------------------------------------------------------------------------------|
| <b>De Kleine<sup>E3</sup></b><br><b>The Netherlands</b> | 11 BPD (8M, 3F)<br>39 controls (20M, 19F)                        | BPD mean 30.6<br>SD 2.0<br>Controls X                                                | BPD mean 1673<br>SD 340<br>Controls X                                                | BPD mean 9.0 days (range 1.8-36)<br>Controls X | BPD mean 13.4<br>SD 3.1<br>Controls mean 13.7<br>SD 1.6                               | 1967-1977     | X                | Water sealed spirometer (Lode instruments, Groningen, Netherlands) | Lung function as percentage predicted for sex and height <sup>E32, E33</sup>    |
| <b>Doyle<sup>E4</sup></b><br><b>Australia</b>           | 500-999g group (35M, 43F), 1000-1500g group (55m, 47F)<br>>2499g | 500-999g group mean 27.5<br>SD 2.3, 1000-1500g group mean 1500g<br>>2499g group mean | 500-999g group mean 859 SD 100, 1000-1500g group mean 1259 SD 145, >2499g group mean | X                                              | 500-999g group mean 14.1 SD 0.2, 1000-1500g group mean 14.2 SD 0.3, >2499g group mean | 1977-1982     | Not given        | Jaeger Bodyscreen II-Bodybox (Jaeger, Germany)                     | Lung function as percentage predicted for age, height and gender <sup>E34</sup> |



|                                           |                                             |                                                                                                                 |                                                                                                                           |                                                                                |                                                                                                                      |                                       |   |                                                                                 |                                                                      |
|-------------------------------------------|---------------------------------------------|-----------------------------------------------------------------------------------------------------------------|---------------------------------------------------------------------------------------------------------------------------|--------------------------------------------------------------------------------|----------------------------------------------------------------------------------------------------------------------|---------------------------------------|---|---------------------------------------------------------------------------------|----------------------------------------------------------------------|
|                                           | group<br>(26M, 16F)                         | 29.6 SD<br>1.5,<br>>2499g<br>group<br>mean<br>39.9 SD<br>1.0                                                    | 3420 SD 427                                                                                                               |                                                                                | 14.2 SD 0.1                                                                                                          |                                       |   |                                                                                 |                                                                      |
| <b>Halvorsen<sup>E10</sup><br/>Norway</b> | BPD (30F,<br>32M)<br>Controls<br>(42F, 39M) | Mild BPD<br>mean<br>26.8<br>SD<br>1.4<br>M/S BPD<br>mean<br>26.4<br>SD 1.4<br>Control<br>group<br>term          | Mild BPD<br>mean 981.0<br>SD<br>200.2<br>M/S BPD<br>mean<br>868.8<br>SD 166.0<br>Control<br>group mean<br>3494<br>SD 300  | Mild BPD mean<br>7.2<br>Range 0-40.0<br>M/S BPD mean<br>13.8<br>Range 0.7-54.5 | 2<br>populations<br>assessed 2nd<br>mean 10.6<br>SD 0.4<br>1 <sup>st</sup> 17.7<br>SD 1.2                            | 1982-<br>1985<br>and<br>1991-<br>1992 | X | Vmax 22 spirometer<br>(SensorMedics Inc.,<br>Anaheim, USA)                      | Expressed as<br>percentage of the<br>predicted values <sup>E39</sup> |
| <b>Bader<sup>E51</sup><br/>USA</b>        | 10 BPD<br>(6m, 4F)<br>8 control<br>(4M, 4F) | BPD<br>group<br>mean 29<br>SEM 0.7,<br>range 26-<br>32,<br>control<br>group<br>mean 40<br>SEM 0.3,<br>range 39- | BPD group<br>mean 1173<br>SEM 120,<br>range 765-<br>2000,<br>control<br>group mean<br>3248 SEM<br>166, range<br>2500-3960 | BPD group<br>IPPB mean 44<br>days, SEM 6,<br>range 7-65<br>Control group<br>0  | BPD group<br>mean 10.4,<br>SEM 0.6,<br>range 7.3-<br>12.2, Control<br>group mean<br>10.1 SEM<br>0.9, range<br>7.5-14 | 1973-<br>1979                         | X | Wedge spirometer<br>(model 525,<br>Medscience<br>Electronics Inc., St<br>Louis) | Lung function as<br>percentage predicted<br>X                        |

|                                            |                                                     |                                                                              |                                                                                     |                                                                                                                                                                                                               |                                                                             |               |                             |                                                                                                         |                                                                                                 |
|--------------------------------------------|-----------------------------------------------------|------------------------------------------------------------------------------|-------------------------------------------------------------------------------------|---------------------------------------------------------------------------------------------------------------------------------------------------------------------------------------------------------------|-----------------------------------------------------------------------------|---------------|-----------------------------|---------------------------------------------------------------------------------------------------------|-------------------------------------------------------------------------------------------------|
|                                            |                                                     | 41                                                                           |                                                                                     |                                                                                                                                                                                                               |                                                                             |               |                             |                                                                                                         |                                                                                                 |
| <b>Karila<sup>E52</sup><br/>France</b>     | 20 BPD<br>(13M, 7F)<br>18 controls<br>(8M, 10F)     | BPD<br>group<br>mean 31<br>SD 2.3                                            | BPD group<br>mean 1441<br>SD 523<br>Control<br>group X                              | BPD group<br>mean duration<br>mechanical<br>ventilation<br>145.1 days SD<br>130.1 not<br>counting<br>nocturnal<br>home<br>ventilation<br>which was<br>used by 7<br>children for<br>mean 21.1<br>months SD 9.3 | BPD group<br>mean 10.1<br>SD 2.3,<br>control 9.9<br>SD 2.0                  | X             | 6 in BPD group<br>received  | Conventional<br>spirometry, as<br>recommended by ERS                                                    | Lung function as<br>percentage of<br>predicted values for<br>age and sex <sup>E61</sup>         |
| <b>Kennedy<sup>E14</sup><br/>Australia</b> | BPD (14M,<br>12F)<br>Control<br>group<br>(39M, 43F) | BPD<br>group<br>mean<br>26.8 SD<br>1.5,<br>Control<br>mean<br>40.0 SD<br>1.6 | BPD group<br>mean 959.8<br>SD 163.5,<br>Control<br>group mean<br>3459.1 SD<br>509.0 | Duration of<br>IPPV BPD<br>groups median<br>47.0 IQR 24.5,<br>50.0<br>Control n/a                                                                                                                             | BPD group<br>mean 11.3<br>SD 0.8,<br>Control 11.4<br>SD 0.8                 | 1981-<br>1982 | X                           | Pulmonary function<br>testing was<br>performed using the<br>Jaeger Masterlab<br>system                  | Results were<br>evaluated as<br>percentage predicted<br>for gender and<br>height <sup>E34</sup> |
| <b>Korhonen<sup>E16</sup><br/>Finland</b>  | BPD group<br>(21m 13F)<br>Control<br>group X        | BPD<br>group<br>mean 27<br>SD 2,<br>range 23-<br>30                          | BPD group<br>mean 951 SD<br>207, range<br>570-1300                                  | BPD group<br>32/34<br>ventilated<br>duration<br>median 27,<br>range 0-89                                                                                                                                      | BPD group<br>median 7.1<br>range 6.7-7.8<br>Control<br>group<br>median 7.2, | 1990-<br>1994 | BPD group<br>14/34 received | Flow volume<br>spirometry were<br>recorded by mass<br>flow sensor<br>(2200/Vmax 22,<br>SensorMedics BV, | Finish FVS reference<br>values for children<br>were used <sup>E43</sup>                         |

|                                          |                                                  |                                                         |                                                         |                                                                          |                                                                          |           |                                    |                                                                                                                                                                                                                                   |                                                                                   |
|------------------------------------------|--------------------------------------------------|---------------------------------------------------------|---------------------------------------------------------|--------------------------------------------------------------------------|--------------------------------------------------------------------------|-----------|------------------------------------|-----------------------------------------------------------------------------------------------------------------------------------------------------------------------------------------------------------------------------------|-----------------------------------------------------------------------------------|
|                                          |                                                  | Control group term                                      |                                                         | days                                                                     | range 6.9-8.3                                                            |           |                                    | Bilthoven, Netherlands)                                                                                                                                                                                                           |                                                                                   |
| <b>Koumbourlis<sup>E53</sup><br/>USA</b> | BPD group (9M, 8F)                               | BPD group mean 29.1 SD 1.7 Median 29 Range 26-32        | BPD group mean 1120 SD 190, median 1110, range 880-1490 | BPD group 10/17 ventilated mean 10.8 days SD 8.0, median 9.5, range 3-27 | BPD group mean 8.2 SD 1.2                                                | X         | X                                  | Lung volumes measured using a 7-liter Collins lung-volume analyzer (Warren E. Collins, Inc., Braintree, MA)MEFV curves were obtained using a 10-liter water-sealed Stead-Wells spirometer (warren E Collins, Inc., Braintree, MA) | Normal predicted values for lung volume etc. were obtained <sup>E62, E63</sup>    |
| <b>Baraldi<sup>E18</sup><br/>Italy</b>   | BPD group (14M, 17F)<br>Control group (14M, 17F) | BPD group mean 28.6 SEM 0.3<br>Control group term       | BPD group mean 1081 SEM 57<br>Control group X           | BPD group all ventilated mean 26 days SEM 3.4 days<br>Controls X         | BPD group mean 8.6 SEM 0.3,<br>Controls mean 8.4 SEM 0.4.                | 1990-1994 | BPD group 24/31<br>Control group X | Flow volume spirometry (Biomedin, Padova, Italy)                                                                                                                                                                                  | Lung function as percentage of predicted values for height and sex <sup>E32</sup> |
| <b>Barker<sup>E19</sup><br/>Germany</b>  | BPD group (7M, 6F)<br>Control group (8M, 5F)     | BPD group mean 30.3, range 28-33,<br>control group term | BPD group mean 1139, range 710-1480,<br>Control group X | BPD group 13/13 mean 30.3 days, range 7-81,<br>control group X           | BPD group mean 9.8 (range 8-14),<br>control group mean 10.5 years (8-12) | 1983-1989 | X                                  | Baseline lung function was measured by standard spirometry and performed additional body plethysmography (Jaeger Body Screen II, Wurzburg, Germany)                                                                               | Lung function as percentage predicted <sup>X</sup>                                |

|                                         |                                               |                                                                                   |                                                                                                  |                                                                                         |                                                                             |           |   |                                                                                                           |                                                                                                                                                      |
|-----------------------------------------|-----------------------------------------------|-----------------------------------------------------------------------------------|--------------------------------------------------------------------------------------------------|-----------------------------------------------------------------------------------------|-----------------------------------------------------------------------------|-----------|---|-----------------------------------------------------------------------------------------------------------|------------------------------------------------------------------------------------------------------------------------------------------------------|
| <b>Santuz<sup>E54</sup><br/>Italy</b>   | BPD group (9M, 3F)<br>Control group (11M, 5F) | BPD group mean 30, SD 2, range 27-32,<br>Control group mean 39, SD 1, range 37-40 | BPD group mean 1400, SD 335, range 890-1900,<br>Control group mean 3335, SD 418, range 2800-4100 | BPD group 12/12 ventilated mean 20 days SD 15, median 17, range 7-60<br>Control group X | BPD group mean 8.1 SD 1.8, range 6-12, controls mean 8.1 SD 1.5, range 6-12 | 1981-1987 | X | Spirometry by a 10 L bell spirometer connected to a computerized system (Baires; Biomedin, Padova, Italy) | Results were expressed as a percentage of predicted reference values appropriate for height, sex and age <sup>E32</sup>                              |
| <b>Pianosi<sup>E21</sup><br/>Canada</b> | BPD group (9M, 8F)<br>Controls X              | CMV BPD median 27, IQR 26.8,29<br>HFV BPD median 28, IQR 26, 28.8<br>Control term | CMV BPD median 1060, IQR 888, 1373<br>HFV BPD median 1025, IQR 895, 1155<br>Control X            | CMV BPD median 13 days, IQR 8, 44<br>HFV BPD median 24 days, IQR 9, 33<br>Control X     | 8-9                                                                         | 1986-1987 | X | Spirometry measured in 6200 Autobox, Sensormedics, Yorba Linda CA                                         | Results were expressed as percentage predicted using reference values <sup>E32, E44, E45</sup>                                                       |
| <b>Northway<sup>E55</sup><br/>USA</b>   | BPD (18M, 8F)<br>Controls (23M, 30F)          | BPD group mean 33.2, SD 3.8,<br>Control group                                     | BPD group mean 1894, SD 703,<br>Control group X                                                  | All BPD group ventilated<br>Control group X                                             | BPD group mean 18.3 SD 2.7, controls mean 18.0, SD 3.1                      | 1964-1973 | X | Spirometry obtained using Fleisch pneumotachmeter                                                         | Results reported as percentages of predicted values according to standardized values for normal children and adults, 15% race-correction factor when |

|                                                    |                                                |                                                                                                 |                                                                                         |                                                                                        |                                                                                                                |               |       |                                                                                              |                                                                                                                  |
|----------------------------------------------------|------------------------------------------------|-------------------------------------------------------------------------------------------------|-----------------------------------------------------------------------------------------|----------------------------------------------------------------------------------------|----------------------------------------------------------------------------------------------------------------|---------------|-------|----------------------------------------------------------------------------------------------|------------------------------------------------------------------------------------------------------------------|
|                                                    |                                                | term                                                                                            |                                                                                         |                                                                                        |                                                                                                                |               |       |                                                                                              | appropriate <sup>E32, E45, E64-E69, E40, E42</sup>                                                               |
| <b>Ng<sup>E56</sup><br/>Hong Kong</b>              | BPD group with LF results (5m, 2F)             | Whole BPD group mean 28 SD 2.6                                                                  | Whole BPD group mean 1096 SD 366                                                        | 55/55 ventilated, mean 29 days SD 17                                                   | 7 BPD with LF results 7-10                                                                                     | 1987-1995     | 28/55 | Spirometry was performed with a portable spirometer (MicroPlus; Micro Medical Ltd, Kent, UK) | Reference values used <sup>E70</sup>                                                                             |
| <b>Mitchell<sup>E23</sup><br/>USA</b>              | BPD group (7M, 3F)<br>Control group (4M, 6F)   | BPD group mean 30, SD 5,<br>Control group mean 40, SD 1                                         | BPD group mean 1359, SD 1041<br>Control group mean 3157, SD 606                         | 10/10 BPD,<br>Control group X                                                          | BPD group mean 7, SD 1,<br>Term group mean 7, SD 1                                                             | 1985-1987     | X     | Spirometry with a calibrated spirometer (SensorMedics 2200)                                  | Results as percentage predicted based on height, gender and race using the standard equation <sup>E41, E42</sup> |
| <b>Vrijlandt<sup>E24</sup><br/>The Netherlands</b> | BPD group (8M, 0F)<br>Control group (16M, 32F) | Whole PT group including BPD group mean 30 SD 2, range 26-36,<br>Control group term range 37-42 | Whole PT group including BPD group mean 1246 SD 232, range 720-1750,<br>Control group X | Whole PT group including BPD group mean 6.3 days SD 12, range 0-51,<br>Control group X | Whole PT group including BPD group mean 19 SD 0.3, range 19-20,<br>Control group mean 20.8 SD 1.2, range 18-22 | PT group 1983 | 0/42  | Spirometry using a pneumotachograph                                                          | Results as percentage predicted based on height <sup>E47</sup>                                                   |
| <b>Smyth<sup>E57</sup></b>                         | BPD group                                      | BPD                                                                                             | BPD group                                                                               | 9/9 mean                                                                               | BPD group                                                                                                      | 1970-         | X     | Spirometry with a 9-L                                                                        | Results as percentage                                                                                            |

|                                                                                       |                                               |                                                            |                                                              |                                                                                        |                                                                                       |           |   |                                                                                                         |                                                                                                 |
|---------------------------------------------------------------------------------------|-----------------------------------------------|------------------------------------------------------------|--------------------------------------------------------------|----------------------------------------------------------------------------------------|---------------------------------------------------------------------------------------|-----------|---|---------------------------------------------------------------------------------------------------------|-------------------------------------------------------------------------------------------------|
| <b>Canada</b>                                                                         | (7M, 2F)                                      | group mean 30, range 24-34                                 | mean 1476.5, range 730-2200                                  | duration of IPPV 8 days, range 2-14                                                    | mean 8.5, range 7.2-9.6                                                               | 1972      |   | water spirometer (Warren E. Collins, Inc, Braintree, MA)                                                | predicted <sup>E62</sup>                                                                        |
| <b>Wheeler<sup>E25</sup></b><br>X                                                     | X                                             | X                                                          | BPD group mean 1443, SD 463, Control group mean 3540, SD 570 | X                                                                                      | BPD group mean 7.2, SD 0.9, Control group mean 8.3, SD 0.9                            | X         | X | X                                                                                                       | Results as percentage predicted <sup>x</sup>                                                    |
| <b>Ahrens<sup>E58</sup></b><br><b>Germany</b>                                         | X                                             | BPD group <34, term group term                             | BPD group <1500g                                             | BPD group 19/19, term group X                                                          | Preterm children mean age 7.7, terms 6-7                                              | 1977-1981 | X | Whole body plethysmography                                                                              | Results as percentage predicted, given in graphical form so results read of graphs <sup>x</sup> |
| <b>Abreu<sup>E26</sup></b><br><b>Brazil</b>                                           | BPD group (9M, 4F)<br>Control group (9M, 11F) | BPD group mean 32 SD 1.5 range 30-34<br>Control group term | BPD group mean 1037 SD 229 range 830-1670<br>Control group X | BPD group 13/13 mean 11 SD 6.6 range 3-26<br>Control group X                           | BPD group mean 8.5 SD 0.97, Control mean 8.2 SD 1.14                                  | 1993-1996 | X | SpiroCard PC Card Flux spirometer (QRS Diagnostic-Plymouth, USA)                                        | Expressed as percentage predicted <sup>E35</sup>                                                |
| <b>Hakulinen<sup>E28</sup></b><br><b>Finland</b><br><b>(Data as Medians in paper)</b> | BPD group (8M,12F)<br>Control group X         | BPD group mean 27.8 SD 1.4 range 25-30.7,<br>Control group | BPD group mean 952 SD 162 range 670-1235,<br>Control group X | BPD group duration of ventilator treatment median 32 days, range 9-88, Control group X | BPD group mean 8.5 SD 1.1 range 7.0-11.2,<br>Control group mean 8.6 SD 1.1 range 7.1- | 1978-1985 | X | Flow/volume spirometry with a wedge-bellows-type dynamic spirometer (Vitalograph PS II, Birmingham, UK) | Expressed as percentage predicted <sup>E44,E35,E48-E50</sup>                                    |

|                                                                                              |                         |                                                                                                                     |                                                                                                                        |                                                                                                                                            |                                                                                                                  |               |                                                      |                                                        |                                                             |
|----------------------------------------------------------------------------------------------|-------------------------|---------------------------------------------------------------------------------------------------------------------|------------------------------------------------------------------------------------------------------------------------|--------------------------------------------------------------------------------------------------------------------------------------------|------------------------------------------------------------------------------------------------------------------|---------------|------------------------------------------------------|--------------------------------------------------------|-------------------------------------------------------------|
|                                                                                              |                         | term                                                                                                                |                                                                                                                        |                                                                                                                                            | 11.2                                                                                                             |               |                                                      |                                                        |                                                             |
| <b>Blayney<sup>E59</sup><br/>Canada<br/>(Data as<br/>Medians in<br/>paper)</b>               | BPD group<br>72% M      | BPD<br>group<br>mean 29<br>SD 3.2<br>range 25-<br>36                                                                | BPD group<br>mean 1228<br>SD 496 range<br>700-2560                                                                     | 30/32<br>ventilated<br>Mean days of<br>assisted<br>ventilation 29<br>SD 22.8, range<br>0-99                                                | 10                                                                                                               | 1977-<br>1980 | X                                                    | X                                                      | Expressed as<br>percentage<br>predicted <sup>E62</sup>      |
| <b>Aquino<sup>E60</sup><br/>USA<br/>(Data as<br/>Medians in<br/>paper)</b>                   | BPD group<br>(16M, 10F) | BPD<br>group<br>median<br>28, range<br>22-36                                                                        | BPD group<br>median<br>900g, range<br>482-2350g                                                                        | BPD group<br>median<br>duration of<br>mechanical<br>ventilation 60<br>days, range 3-<br>135 days                                           | Median 10<br>range 5-18                                                                                          | X             | X                                                    | Pneumotachometer<br>(Warren Collins,<br>Braintree, MA) | Expressed as<br>percentage<br>predicted <sup>E35, E42</sup> |
| <b>Berggren<sup>E29</sup><br/>Brostrom<br/>Sweden<br/>(Data as<br/>Medians in<br/>paper)</b> | X                       | Mild BPD<br>group<br>median<br>27, range<br>24-30,<br>Moderate<br>BPD<br>group<br>median<br>27.5<br>range 25-<br>30 | Mild BPD<br>group<br>median<br>987.5, range<br>654-1520,<br>Moderate<br>BPD group<br>median 1133<br>range 597-<br>1252 | Duration of<br>ventilatory<br>therapy days<br>Mild BPD<br>group median<br>0, range 0-34,<br>Moderate BPD<br>group median<br>3.5 range 0-38 | Mild BPD<br>group<br>median 88.5<br>months,<br>range 76-99,<br>Moderate<br>BPD group<br>median 87<br>range 79-95 | 1992-<br>1997 | Mild BPD<br>group 1/20,<br>moderate BPD<br>group 3/8 | Pneumotachograph<br>(Vitalograph)                      | Expressed as<br>percentage<br>predicted <sup>E35</sup>      |

**Table E2c:- Lung function outcomes of the included articles BPD group (supplemental oxygen dependency for at least 28 days from birth) compared to term control group**

| STUDY                    | FEV <sub>1</sub> PREDICTED                                                      | FVC PREDICTED                                                            | FEF <sub>25-75</sub> PREDICTED                                                  | RATIOS                                                                                            | TLC                                                                                     | RV                                                                                         | DLCO                                                                      |
|--------------------------|---------------------------------------------------------------------------------|--------------------------------------------------------------------------|---------------------------------------------------------------------------------|---------------------------------------------------------------------------------------------------|-----------------------------------------------------------------------------------------|--------------------------------------------------------------------------------------------|---------------------------------------------------------------------------|
| De Kleine <sup>E3</sup>  | BPD mean 73<br>SD 17<br>Control mean 95<br>SD 12                                | X                                                                        | X                                                                               | X                                                                                                 | X                                                                                       | X                                                                                          | X                                                                         |
| Doyle <sup>E4</sup>      | BPD mean 88.5<br>SD 18.2<br>NBW mean 104.6<br>SD 13.2                           | BPD mean 98.2<br>SD 14.4<br>NBW mean 104.8<br>SD 12.0                    | BPD mean 71.3<br>SD 30.9<br>NBW mean 99.1<br>SD 23.4                            | FEV <sub>1</sub> /FVC<br>BPD mean 78.6<br>SD 11.1<br>NBW mean 87.0<br>SD 7.0                      | BPD mean 98.9<br>SD 14.7<br>NBW mean<br>102.5<br>SD 13.9                                | BPD mean<br>115.8<br>SD 53.0<br>NBW mean<br>117.4<br>SD 30.8                               | X                                                                         |
| Halvorsen <sup>E10</sup> | BPD mean 86.4<br>SD 10.9<br>Control 98.6<br>SD 9.9                              | X                                                                        | X                                                                               | X                                                                                                 | X                                                                                       | X                                                                                          | X                                                                         |
| Bader <sup>E51</sup>     | BPD mean 73, SEM 6,<br>range 44-106,<br>Control mean 93,<br>SEM 4, range 75-115 | X                                                                        | BPD mean 55, SEM 9,<br>range 22-105,<br>Control mean 88,<br>SEM 9, range 58-140 | X                                                                                                 | BPD mean 102,<br>SEM 3, range<br>92-121,<br>Control mean<br>103, SEM 3,<br>range 88-119 | BPD mean 158,<br>SEM 12, range<br>104-226,<br>Control mean<br>110, SEM 11,<br>range 69-160 | X                                                                         |
| Karila <sup>E52</sup>    | BPD group mean 79.1<br>SD 19.3<br>Control group mean<br>106.3<br>SD 11.3        | BPD group mean 89.8<br>SD 18.8<br>Control group mean<br>101.7<br>SD 10.3 | BPD group mean 50.5<br>SD 26.4<br>Control group mean<br>99.8<br>SD 18.9         | FEV <sub>1</sub> /VC<br>BPD group mean<br>73.2<br>SD 16.3<br>Control group<br>mean 86.4<br>SD 4.1 | BPD group<br>mean 100.7<br>SD 15.0<br>Control group<br>mean 96.8<br>SD 8.7              | X                                                                                          | BPD group<br>mean 97.3<br>SD 22.2<br>Control group<br>mean 89.8<br>SD 9.5 |
| Kennedy <sup>E14</sup>   | BPD group mean 78.4<br>SD 170<br>Control group mean<br>102<br>SD 10             | BPD group mean<br>92.8<br>SD 11.5<br>Control group mean<br>104.2         | BPD group mean 54.5<br>SD 29.2<br>Control group mean<br>90.7<br>SD 21.8         | X                                                                                                 | BPD group<br>mean 98.1<br>SD 13.1<br>Control group<br>mean 98.3                         | X                                                                                          | X                                                                         |



|                                   |                                                                                          |                                                                                          |                                                                     |                                                                                                                 |                                                                                           |                                                                                  |                                                                                           |
|-----------------------------------|------------------------------------------------------------------------------------------|------------------------------------------------------------------------------------------|---------------------------------------------------------------------|-----------------------------------------------------------------------------------------------------------------|-------------------------------------------------------------------------------------------|----------------------------------------------------------------------------------|-------------------------------------------------------------------------------------------|
|                                   |                                                                                          | SD 9.6                                                                                   |                                                                     |                                                                                                                 | SD 10.8                                                                                   |                                                                                  |                                                                                           |
| <b>Korhonen</b> <sup>E16</sup>    | BPD group mean 90<br>SD 14, range 56-122<br>Control group mean 99<br>SD 11, range 72-117 | BPD group mean 98<br>SD 16, range 60-129<br>Control group mean 102<br>SD 8, range 83-117 | X                                                                   | FEV <sub>1</sub> /FVC<br>BPD group mean 88<br>SD 9, range 73-108<br>Control group mean 92<br>SD 7, range 78-104 | BPD group mean 109<br>SD 14, range 87-139<br>Control group mean 107<br>SD 8, range 93-128 | BPD group median 159<br>range 77-327<br>Control group median 132<br>range 60-214 | BPD group mean 86<br>SD 16, range 68-130<br>Control group mean 101<br>SD 15, range 71-138 |
| <b>Koumbourlis</b> <sup>E53</sup> | BPD group mean 98.6<br>SD 14.2                                                           | X                                                                                        | BPD group mean 73.6<br>SD 18.7                                      | FEV <sub>1</sub> /FVC<br>BPD group mean 92.4<br>SD 6.5                                                          | BPD group mean 98.5<br>SD 13.1                                                            | BPD group mean 125.9<br>SD 37.7                                                  | X                                                                                         |
| <b>Baraldi</b> <sup>E18</sup>     | BPD group mean 77.8<br>SD 12.8<br>Control group mean 100.1<br>SD 12.8                    | BPD group mean 85.9<br>SEM 2.5<br>Control group mean 101.7<br>SEM 2.5                    | BPD group mean 63.9<br>SEM 4<br>Control group mean 110.9<br>SEM 5.1 | FEV <sub>1</sub> /FVC<br>BPD group mean 81.8<br>SEM 2<br>Control group mean 89.4<br>SEM 1                       | X                                                                                         | X                                                                                | X                                                                                         |
| <b>Barker</b> <sup>E19</sup>      | BPD group mean 90<br>SD 14<br>Control group mean 106<br>SD 11                            | BPD group mean 83<br>SD 12<br>Control group mean 97<br>SD 6                              | X                                                                   | X                                                                                                               | X                                                                                         | X                                                                                | X                                                                                         |
| <b>Santuz</b> <sup>E54</sup>      | BPD group mean 83<br>SD 13<br>Control group mean 100<br>SD 8                             | BPD group mean 87<br>SD 10<br>Control group mean 96<br>SD 8                              | BPD group mean 77<br>SD 30<br>Control group mean 110<br>SD 14       | X                                                                                                               | X                                                                                         | X                                                                                | X                                                                                         |
| <b>Pianosi</b> <sup>E21</sup>     | BPD group mean 86<br>SD 14<br>Control group mean                                         | BPD group mean 99<br>SD 11<br>Control group mean                                         | BPD group mean 72<br>SD 24<br>Control group mean                    | X                                                                                                               | BPD group mean 107<br>SD 8                                                                | BPD group mean 141<br>SD 34                                                      | BPD group mean 99<br>SD 17                                                                |

|                                 |                                                                          |                                                                          |                                                                       |                                                                                                     |                                                                            |                                                                             |                                                                           |
|---------------------------------|--------------------------------------------------------------------------|--------------------------------------------------------------------------|-----------------------------------------------------------------------|-----------------------------------------------------------------------------------------------------|----------------------------------------------------------------------------|-----------------------------------------------------------------------------|---------------------------------------------------------------------------|
|                                 | 90<br>SD 8                                                               | 96<br>SD 9                                                               | 86<br>SD 12                                                           |                                                                                                     | Control group<br>mean 97<br>SD 10                                          | Control group<br>mean 102<br>SD 26                                          | Control group<br>mean 109<br>SD 20                                        |
| <b>Northway</b> <sup>E55</sup>  | BPD group mean 74.8<br>SE 2.9<br>Control group mean<br>100.40<br>SE 1.5  | BPD group mean 96.8<br>SE 3.2<br>Control group mean<br>105.4<br>SE 1.7   | BPD group mean 46.5<br>SE 3.6<br>Control group mean<br>87.8<br>SE 2.7 | X                                                                                                   | BPD group<br>mean 108.6<br>SE 2.9<br>Control group<br>mean 105.9<br>SE 1.8 | X                                                                           | BPD group<br>mean 80.2<br>SE 2.5<br>Control group<br>mean 87.8<br>SE 1.7  |
| <b>Ng</b> <sup>E56</sup>        | BPD group with LF<br>mean 95<br>SD 19.4                                  | Results given<br>separately for each of<br>the 7 patients                | X                                                                     | X                                                                                                   | X                                                                          | X                                                                           | X                                                                         |
| <b>Mitchell</b> <sup>E23</sup>  | BPD group mean 78<br>SD 21<br>Control group mean<br>91<br>SD 14          | BPD group mean 90<br>SD 19<br>Control group mean<br>93<br>SD 15          | BPD group mean<br>45<br>SD 22<br>Control group mean<br>87<br>SD 24    | FEV <sub>1</sub> /FVC<br>BPD group mean<br>0.77<br>SD 0.11<br>Control group<br>mean 0.88<br>SD 0.05 | X                                                                          | X                                                                           | BPD group<br>mean 80 SE 12,<br>control group<br>mean 100 SE 3             |
| <b>Vrijlandt</b> <sup>E24</sup> | BPD group mean 90.1<br>SD 19.8<br>Control group mean<br>109.6<br>SD 13.4 | BPD group mean 96.4<br>SD 13.1<br>Control group mean<br>106.0<br>SD 10.8 | X                                                                     | FEV <sub>1</sub> /FVC<br>BPD group mean<br>78.8<br>SD 8.1<br>Control group<br>mean 87.4<br>SD 6.6   | BPD group<br>mean 102.2<br>SD 8.9<br>Control group<br>mean 103.3<br>SD 9.7 | BPD group<br>mean 122.7<br>SD 25.4<br>Control group<br>mean 90.3<br>SD 25.3 | BPD group<br>mean 91.4<br>SD 10.5<br>Control group<br>mean 96.3<br>SD 9.9 |
| <b>Smyth</b> <sup>E57</sup>     | BPD group mean 67.8                                                      | BPD group mean 76                                                        | BPD group mean 62                                                     | X                                                                                                   | X                                                                          | X                                                                           | X                                                                         |
| <b>Wheeler</b> <sup>E25</sup>   | BPD group mean 82<br>SD 20<br>Control group mean<br>104<br>SD 15         | X                                                                        | BPD group mean 55<br>SD 23<br>Control group mean<br>103<br>SD 21      | X                                                                                                   | BPD group<br>mean 116<br>SD 28<br>Control group<br>mean 111                | X                                                                           | X                                                                         |

|                                                                             |                                                                                      |                                                                                                          |                                                             |                                                                                                                                    |                                                                                                             |                                                                                                             |                                                                                                             |
|-----------------------------------------------------------------------------|--------------------------------------------------------------------------------------|----------------------------------------------------------------------------------------------------------|-------------------------------------------------------------|------------------------------------------------------------------------------------------------------------------------------------|-------------------------------------------------------------------------------------------------------------|-------------------------------------------------------------------------------------------------------------|-------------------------------------------------------------------------------------------------------------|
|                                                                             |                                                                                      |                                                                                                          |                                                             |                                                                                                                                    | SD 34                                                                                                       |                                                                                                             |                                                                                                             |
| <b>Ahrens</b> <sup>E58</sup>                                                | BPD group mean<br>77.11<br>SD 12.42<br>Control group mean<br>78<br>SD 20             | X                                                                                                        | X                                                           | X                                                                                                                                  | X                                                                                                           | X                                                                                                           | X                                                                                                           |
| <b>Abreu</b> <sup>E26</sup>                                                 | BPD group mean 99<br>SD 12, Control group<br>mean 102 SD 15                          | X                                                                                                        | X                                                           | X                                                                                                                                  | X                                                                                                           | X                                                                                                           | X                                                                                                           |
| <b>Hakulinen</b> <sup>E28</sup><br>(Data as Medians<br>in paper)            | BPD group median<br>88, range 66-108<br>Control group<br>median 99, range 88-<br>119 | BPD group median<br>92.1, SE 2.1 range 87-<br>97<br>Control group<br>median 98.6, SE 2.2<br>range 93-104 | X                                                           | FEV <sub>1</sub> /FVC<br>BPD group median<br>95.5, SE 1.7 range<br>92-99<br>Control group<br>median 102.9, SE<br>1.5 range 100-106 | BPD group<br>median 94.6, SE<br>2.0 range 90-99<br>Control group<br>median 99.7, SE<br>2.3 range 95-<br>104 | BPD group<br>median 91.3, SE<br>7.7 range 78-<br>105<br>Control group<br>median 84.0, SE<br>6.4 range 71-97 | BPD group<br>median 91.1, SE<br>3.4 range 86-97<br>Control group<br>median 100.7,<br>SE 2.2 range<br>95-106 |
| <b>Blayney</b> <sup>E59</sup><br>(Data as Medians<br>in paper)              | Presented graphically                                                                | Given in text                                                                                            | Given in text                                               | Presented<br>graphically                                                                                                           | Presented<br>graphically                                                                                    | Presented<br>graphically                                                                                    | X                                                                                                           |
| <b>Aquino</b> <sup>E60</sup><br>(Data as Medians<br>in paper)               | BPD group median<br>64, range 35-96                                                  | X                                                                                                        | X                                                           | X                                                                                                                                  | X                                                                                                           | X                                                                                                           | X                                                                                                           |
| <b>Berggren Brostrom</b><br><sup>E29</sup><br>(Data as Medians<br>in paper) | Mild and moderate<br>BPD group median<br>81, min max 61-97                           | Mild and moderate<br>BPD group median<br>85, min max 66-109                                              | Mild and moderate<br>BPD group median<br>66, min max 31-107 | Given in litres                                                                                                                    | X                                                                                                           | X                                                                                                           | X                                                                                                           |

Table E3a:- Description of the included articles BPD group (supplemental oxygen dependency 36 weeks PMA) compared to term control group

| STUDY                     | QUALITY SCORE | OBJECTIVE                                                                                                                                           | STUDY DESIGN | STUDY GROUP                                                                                     | CONTROL GROUP                                               | OUTCOME MEASURES                                                                                                    |
|---------------------------|---------------|-----------------------------------------------------------------------------------------------------------------------------------------------------|--------------|-------------------------------------------------------------------------------------------------|-------------------------------------------------------------|---------------------------------------------------------------------------------------------------------------------|
| Fawke <sup>E1</sup>       | 16            | To assess the degree of respiratory morbidity and in extremely premature children in relation to current clinical status and neonatal determinants. | Cohort study | 182 EP (≤25 weeks gestation) 129 with BPD                                                       | 161 classmate controls excluded classmates who were preterm | Spirometry<br>Post-bronchodilator response<br>Questionnaire                                                         |
| Kulasekaran <sup>E5</sup> | 14            | To determine the respiratory outcome of children who had BPD compared with a preterm control group of children at school age.                       | Cohort       | 47 children with BPD                                                                            | X                                                           | Respiratory outcome<br>Family History                                                                               |
| Doyle <sup>E6</sup>       | 17            | To determine respiratory function at 8 years in ELBW, very PT children born in the 1990s compared with NBW controls                                 | Cohort       | 298 ELBW (<1000g)/ very preterm (< 28 weeks gestation) 240 with LF results of which 89 with BPD | 208 NBW (>2499g)                                            | Spirometry<br>ISAAC questionnaire                                                                                   |
| Giacoa <sup>E8</sup>      | 12            | To investigate the outcome of school-age children with BPD compared to a preterm cohort and term control group                                      | Cohort       | 12 BPD                                                                                          | 12 Term Controls                                            | Spirometry<br>Body Composition<br>Dietary intake<br>Intelligence test scores                                        |
| Gross <sup>E9</sup>       | 19            | To assess long-term pulmonary outcome of a regional cohort of children born <32 weeks' gestation compared with a matched                            | Cohort       | 125 PT children born at 24 to 31 weeks gestation. 43 with BPD had                               | 108 healthy term (38 to 42 weeks gestation) controls        | Spirometry<br>Bronchodilator responsiveness<br>Ongoing health problems<br>Rehospitalisation<br>Respiratory symptoms |

|                                 |    |                                                                                                                                                                                                                               |                                            |                                                                                    |                                                               |                                                                                                                                                 |
|---------------------------------|----|-------------------------------------------------------------------------------------------------------------------------------------------------------------------------------------------------------------------------------|--------------------------------------------|------------------------------------------------------------------------------------|---------------------------------------------------------------|-------------------------------------------------------------------------------------------------------------------------------------------------|
|                                 |    | term control group                                                                                                                                                                                                            |                                            | spirometry                                                                         |                                                               | Exercise testing                                                                                                                                |
| <b>Halvorsen</b> <sup>E10</sup> | 15 | To investigate long term outcomes in young people after extremely preterm birth and BPD                                                                                                                                       | Population-based long-term follow-up study | 2 population based cohorts ≤ 28 weeks gestation or ≤ 1000g birthweight 24 with BPD | 81 term controls birth weight between 3 and 4 kg              | Spirometry<br>ISAAC questionnaire<br>Metacholine provocation test<br>Exercise induced asthma and reversibility to salbutamol<br>Allergy testing |
| <b>Smith</b> <sup>E11</sup>     | 9  | The aim of the study was to investigate the role of neonatal influences including post-natal corticosteroids and a diagnosis of BPD, on long-term respiratory outcomes in a group of children born very preterm in the 1990s. | Cross-sectional study                      | 102 PT children<br>37 with BPD                                                     | X                                                             | Spirometry<br>ISAAC questionnaire                                                                                                               |
| <b>Jacob</b> <sup>E12,E13</sup> | 15 | To evaluate the long-term pulmonary sequelae of survivors of BPD of sufficient severity to have required oxygen for at least one month after term.                                                                            | Cohort study                               | 30 PT children<br>15 BPD                                                           | 13 healthy term children                                      | Bronchial symptom questionnaire<br>Spirometry<br>Lung elastic recoil pressure<br>Response to a bronchodilator                                   |
| <b>Kilbride</b> <sup>E15</sup>  | 14 | To assess pulmonary function and exercise capacity of apparently asymptomatic children who were born EP                                                                                                                       | Longitudinal follow up study               | 50 ELBW children <801g<br>16 with BPD                                              | 25 age matched NBW children >37 weeks gestation and >2500g BW | Medical history and recent Hospitalisations<br>Spirometry<br>Exercise testing                                                                   |
| <b>Korhonen</b> <sup>E16</sup>  | 16 | To assess respiratory outcome and its predictors                                                                                                                                                                              | Cohort                                     | VLBW cohort (<1500g) 14                                                            | 34 term controls of                                           | Spirometry<br>Mailed questionnaire                                                                                                              |

|                                                                       |    |                                                                                                                                                      |                    |                                                                                |                                 |                                                                                                                               |
|-----------------------------------------------------------------------|----|------------------------------------------------------------------------------------------------------------------------------------------------------|--------------------|--------------------------------------------------------------------------------|---------------------------------|-------------------------------------------------------------------------------------------------------------------------------|
|                                                                       |    | during the surfactant era in VLBW schoolchildren with and without BPD                                                                                |                    | with severe BPD 10 of whom had acceptable spirometry                           | which 33 had spirometry results | Atopic tendency testing                                                                                                       |
| <b>Mieskonen</b> <sup>E20</sup>                                       | 13 | To evaluate the possible inflammatory basis of lung function abnormalities                                                                           | Cohort study       | 40 children with a gestational age ≤ 30 weeks or birthweight <1500g 9 with BPD | 14 term controls                | Spirometry<br>Questionnaires<br>Skin Prick Tests<br>Measurement of exhaled nitric oxide<br>Spirometry before and after school |
| <b>Palta</b> <sup>E22</sup>                                           | 15 | To determine lung function at 10 years in VLBW children and controls                                                                                 | Cohort study       | 265 VLBW children ≤ 1500g 59 with BPD                                          | 360 unselected controls         | Spirometry<br>Home spirometry                                                                                                 |
| <b>Berman</b> <sup>E71</sup>                                          | 6  | To provide information about disease evolution and the predictive nature of early studies                                                            | Longitudinal study | 10 children with BPD                                                           | X                               | Spirometry                                                                                                                    |
| <b>Guimaraes</b> <sup>E27</sup><br>(Data as Medians in paper)         | 8  | To assess pulmonary function and the prevalence of atopy in school age children who were VLBW and to compare those who had BPD to those who did not. | Cohort study       | 85 VLBW children 13 with BPD had LF results                                    | X                               | Spirometry<br>Questionnaire<br>Allergy skin prick test                                                                        |
| <b>Berggren Brostrom</b> <sup>E29</sup><br>(Data as Medians in paper) | 8  | To examine the impact of the severity of BPD on pulmonary morbidity at school age                                                                    | Cohort             | 60 VLBW children 4 with severe BPD                                             | X                               | Spirometry<br>Oscillometry<br>Thoracic HRCT<br>Allergy skin-prick test<br>Blood sample<br>questionnaire                       |

|  |  |  |  |  |  |  |  |  |  |
|--|--|--|--|--|--|--|--|--|--|
|  |  |  |  |  |  |  |  |  |  |
|--|--|--|--|--|--|--|--|--|--|

**Table E3b:- Demographics of the included articles BPD group (supplemental oxygen dependency 36 weeks PMA) compared to term control group**

| STUDY COUNTRY                                       | SUBJECTS (GENDER)                | GA (WEEKS)                                             | BW (GRAMS)                                   | DURATION ON MECHANICAL VENTILATION (DAYS)                    | AGE TESTED (YEARS)                                                              | YEAR OF BIRTH | SURFACTANT GIVEN                  | METHOD OF MEASURING LUNG FUNCTION                                                            | METHOD OF STANDARDISING LUNG FUNCTION MEASUREMENTS                                                     |
|-----------------------------------------------------|----------------------------------|--------------------------------------------------------|----------------------------------------------|--------------------------------------------------------------|---------------------------------------------------------------------------------|---------------|-----------------------------------|----------------------------------------------------------------------------------------------|--------------------------------------------------------------------------------------------------------|
| <b>Fawke<sup>E1</sup></b><br><b>UK and Ireland</b>  | BPD (59M, 70F), Controls (43% M) | BPD mean 24.9, SD 0.8<br>Control X excluded if preterm | BPD mean 740, SD 120,<br>Controls X          | X                                                            | Range 10.1 to 12.1.<br>EP BPD mean 11.0, SD 0.4.<br>Controls mean 10.9 SD 0.55. | 1995          | BPD 114/129<br>Controls X         | Portable spirometer (Jaeger Masterscope, Lab Manager, V4.65; CareFusion, Hoechberg, Germany) | Spirometry data were expressed as z-scores to adjust for height, age and sex <sup>E30, E31</sup>       |
| <b>Kulasekaran<sup>E5</sup></b><br><b>Australia</b> | BPD group (23M, 24F)             | BPD group mean 28.5 SD 1.5                             | BPD group mean 1073 SD 242                   | BPD 47/47 days of mechanical ventilation median 10, IQR 7-18 | 7-10                                                                            | 1989-1990     | 0/47                              | Pulmonary function laboratory system (Sensormedics, Yorba Linda, CA, USA)                    | Spirometry data was expressed as percentage predicted values for height, age and gender <sup>E35</sup> |
| <b>Doyle<sup>E6</sup></b><br><b>Australia</b>       | BPD X, Control group (98M, 110F) | BPD group mean 25.9, SD 1.7<br>Control group X         | BPD group mean 847, SD 183,<br>Control group | X                                                            | 8-9                                                                             | 1991-1992     | In whole PT cohort 92/240 treated | Jaeger Body-screen II Bodybox (Jaeger, Germany)                                              | Results expressed as percentage predicted for age, height and gender <sup>E33</sup>                    |

|                                                 |                                                |                                                              |                                                            |                                                    |                                                                         |                         |   |                                                                              |                                                                             |
|-------------------------------------------------|------------------------------------------------|--------------------------------------------------------------|------------------------------------------------------------|----------------------------------------------------|-------------------------------------------------------------------------|-------------------------|---|------------------------------------------------------------------------------|-----------------------------------------------------------------------------|
|                                                 |                                                |                                                              | Control group >2499                                        |                                                    |                                                                         |                         |   |                                                                              |                                                                             |
| <b>Giacioia<sup>E8</sup></b><br><b>USA</b>      | BPD group (5M, 7F), Controls (5M, 7F)          | BPD group mean 29 SD 2.5, Controls mean 40.07 SD 0.27        | BPD group mean 1015 SD 222, Controls mean 3663 SD 777      | BPD group mean 25.8 days, SD 19.3, Controls mean 0 | BPD group mean 11.83 SEM 1.74, Controls mean 11.9 SEM 1.6               | 1978-1986               | X | SensorMedics model 2600 pulmonary function monitor (SensorMedics Corp)       | Results as percentage predicted <sup>X</sup>                                |
| <b>Gross<sup>E9</sup></b><br><b>USA</b>         | BPD group (23M, 20F), Control group (62M, 46F) | BPD group mean 27 SD 2, Control group mean 40.1 SD 1.1       | BPD group mean 1053 SD 356, Control group mean 3565 SD 427 | 95% of BPD group median 34                         | 7                                                                       | 1985-1986               | 0 | SensorMedics 2200 Pulmonary Function Equipment (SensorMedics, Anaheim Calif) | Results as percentage predicted for age, height and sex <sup>E37, E38</sup> |
| <b>Halvorsen<sup>E10</sup></b><br><b>Norway</b> | BPD (14M, 10F) Controls (42F, 39M)             | M/S BPD mean 26.4 SD 1.4 Control group term                  | M/S BPD mean 868.8 SD 166.0 Control group mean 3494 SD 300 | M/S BPD mean 13.8 Range 0.7-54.5                   | 2 populations assessed 2nd mean 10.6 SD 0.4 1 <sup>st</sup> 17.7 SD 1.2 | 1982-1985 and 1991-1992 | X | Vmax 22 spirometer (SensorMedics Inc., Anaheim, USA)                         | Expressed as percentage of the predicted values <sup>E39</sup>              |
| <b>Smith<sup>E11</sup></b><br><b>Australia</b>  | X                                              | For whole preterm group all <32 weeks gestation mean 27 SD 2 | For whole preterm group mean 862 SD 161                    | X                                                  | Mean age of BPD and No BPD groups together 10 SD 1                      | 1992-1994               | X | Vmax V62J Autobox (Sensormedics Corp, Yorba Linda, CA)                       | Expressed as percentage predicted <sup>E35, E40, E41</sup>                  |
| <b>Jacob<sup>E12, E13</sup></b>                 | BPD (6M,                                       | BPD group                                                    | BPD group                                                  | BPD group days                                     | BPD group                                                               | 1981-                   | X | X                                                                            | Expressed as a                                                              |



|                                             |                                                       |                                                                                        |                                                                  |                                                                                      |                                                                                               |               |                                      |                                                                                                                                       |                                                                                                                                                                             |
|---------------------------------------------|-------------------------------------------------------|----------------------------------------------------------------------------------------|------------------------------------------------------------------|--------------------------------------------------------------------------------------|-----------------------------------------------------------------------------------------------|---------------|--------------------------------------|---------------------------------------------------------------------------------------------------------------------------------------|-----------------------------------------------------------------------------------------------------------------------------------------------------------------------------|
| <b>Canada</b>                               | 9F),<br>Controls X                                    | mean 28.7<br>SD 2.1<br>Control<br>group<br>term                                        | mean 1110<br>SD 328<br>Control<br>group X                        | of ventilatory<br>assistance<br>median 56.0,<br>IQR 21.0-77.0<br>Control group X     | mean 10.6<br>SD 1.7<br>Control group<br>10.6 SD 2.1                                           | 1987          |                                      |                                                                                                                                       | percentage<br>predicted for sex<br>and height <sup>E35</sup> .<br>For black subjects<br>15% was subtracted<br>from the predicted<br>values for<br>spirometry <sup>E42</sup> |
| <b>Kilbride <sup>E15</sup><br/>USA</b>      | All ELBW<br>(16M, 34F)<br>Control<br>(11M, 14F)       | ELBW<br>mean 26.1<br>SD 1.6<br>NBW >37                                                 | ELBW<br>mean 701<br>SD 80<br>NBW<br>>2500                        | ELBW mean 33<br>days SD 20<br>range 0-78                                             | ELBW group<br>mean 11.3,<br>SD 1.6<br>NBW mean<br>11.1 SD 1.3                                 | 1983-<br>1989 | X                                    | SensorMedics<br>(Yorba Linda, CA),<br>922 dry, rolling seal<br>spirometer                                                             | Expressed as a<br>percentage<br>predicted <sup>x</sup>                                                                                                                      |
| <b>Korhonen <sup>E16</sup><br/>Finland</b>  | Severe BPD<br>group (10m<br>4F)<br>Control<br>group X | Severe<br>BPD group<br>mean 28<br>SD 2,<br>range 23-<br>30<br>Control<br>group<br>term | Severe BPD<br>group<br>mean 893<br>SD 225,<br>range 570-<br>1300 | Severe BPD<br>group 13/14<br>ventilated<br>duration<br>median 45,<br>range 0-89 days | All BPD group<br>median 7.1<br>range 6.7-7.8<br>Control group<br>median 7.2,<br>range 6.9-8.3 | 1990-<br>1994 | Severe BPD<br>group 4/14<br>received | Flow volume<br>spirometry were<br>recorded by mass<br>flow sensor<br>(2200/Vmax 22,<br>SensorMedics BV,<br>Bilthoven,<br>Netherlands) | Finish FVS reference<br>values for children<br>were used <sup>E43</sup> .                                                                                                   |
| <b>Mieskonen <sup>E20</sup><br/>Finland</b> | BPD group<br>(5M, 4F)<br>Control<br>group X           | BPD group<br>median<br>26.9,<br>range<br>24.1-30.7,<br>Controls<br>term                | BPD group<br>median<br>760, range<br>600-1460<br>Controls X      | 39/40 PT<br>children<br>ventilated, BPD<br>group median<br>42 days range 7-<br>75    | BPD group<br>median 8.8<br>range 8.2-9.6<br>Controls<br>median 8.9<br>range 5.3-<br>11.2      | 1989-<br>1991 | X                                    | Spirotrac III,<br>Vitalograph Ltd,<br>Buckingham, UK)                                                                                 | Expressed as<br>percentage<br>predicted <sup>E35</sup>                                                                                                                      |
| <b>Palta <sup>E22</sup><br/>USA</b>         | BPD 49% M<br>Controls<br>56%                          | BPD group<br>mean 28<br>SD 2.3,<br>Controls X                                          | BPD group<br>mean 930<br>SD 228<br>Controls X                    | X                                                                                    | All VLBW<br>mean 10.4 SD<br>0.42, controls<br>mean 9.6 SD                                     | 1988-<br>1991 | Not given for<br>BPD                 | Jaeger AM1<br>portable electronic<br>peak flow meter                                                                                  | Expressed as<br>percentage<br>predicted ratios <sup>E46</sup>                                                                                                               |

|                                                                                                           |                        |                                                              |                                                                     |                                                                                            |                                                                       |               |                         |                                                               |                                                        |
|-----------------------------------------------------------------------------------------------------------|------------------------|--------------------------------------------------------------|---------------------------------------------------------------------|--------------------------------------------------------------------------------------------|-----------------------------------------------------------------------|---------------|-------------------------|---------------------------------------------------------------|--------------------------------------------------------|
|                                                                                                           |                        |                                                              |                                                                     |                                                                                            | 0.72                                                                  |               |                         |                                                               |                                                        |
| <b>Berman</b> <sup>E71</sup><br><b>USA</b>                                                                | X                      | BPD group<br>mean 29                                         | BPD group<br>mean 1250                                              | X                                                                                          | BPD group<br>mean 5.8<br>range 4.2-7                                  | X             | X                       | Wedge spirometer<br>(Med Science<br>Electronics St.<br>Louis) | Expressed as<br>percentage<br>predicted <sup>E72</sup> |
| <b>Guimaraes</b> <sup>E27</sup><br><b>X</b><br><b>(Data as<br/>Medians in<br/>paper)</b>                  | BPD group<br>(10M, 3F) | BPD group<br>median 27<br>range 23-<br>30, mean<br>27 SD 1.9 | BPD group<br>median<br>850 range<br>565-1400,<br>mean 900<br>SD 221 | BPD group<br>13/13 ventilated<br>median 58 days<br>range 7-107,<br>mean 54.5 SD<br>26.6    | BPD group<br>median 84<br>months range<br>62-107 mean<br>91.0 SD 11.3 | 2002-<br>2004 | X                       | Compact<br>Vitalograph,<br>Buckingham, UK                     | Expressed as<br>percentage<br>predicted <sup>E35</sup> |
| <b>Berggren<br/>Brostrom</b> <sup>E29</sup><br><b>Sweden</b><br><b>(Data as<br/>Medians in<br/>paper)</b> | X                      | Severe<br>BPD group<br>median 28,<br>range 25-<br>29         | Severe BPD<br>group<br>median<br>905, range<br>775-1210             | Duration of<br>ventilatory<br>therapy days<br>Severe BPD<br>group median<br>23, range 0-33 | Severe BPD<br>group median<br>85.5 months,<br>range 83-90             | 1992-<br>1997 | Severe BPD<br>group 2/4 | Pneumotachograph<br>(Vitalograph)                             | Expressed as<br>percentage<br>predicted <sup>E35</sup> |

**Table E3c:- Lung function outcomes of the included articles BPD group (supplemental oxygen dependency 36 weeks PMA) compared to term control group**

| <b>STUDY</b>                     | <b>FEV<sub>1</sub> PREDICTED</b>                    | <b>FVC PREDICTED</b>                                | <b>FEF<sub>25-75</sub> PREDICTED</b>               | <b>RATIOS</b>                                                              | <b>TLC</b> | <b>RV</b> | <b>DLCO</b>   |
|----------------------------------|-----------------------------------------------------|-----------------------------------------------------|----------------------------------------------------|----------------------------------------------------------------------------|------------|-----------|---------------|
| <b>Fawke</b> <sup>E1</sup>       | BPD mean 80<br>SD 13,<br>Controls mean 100<br>SD 12 | BPD mean 91<br>SD 13,<br>Controls mean 102<br>SD 12 | BPD mean 58<br>SD 21,<br>Controls mean 90 SD<br>23 | FEV <sub>1</sub> /FVC<br>BPD mean 88<br>SD 11,<br>Controls mean 98<br>SD 8 | X          | X         | X             |
| <b>Kulasekaran</b> <sup>E5</sup> | BPD group mean 82.3                                 | BPD group mean 88.7                                 | BPD group mean 70.1                                | FEV <sub>1</sub> /FVC                                                      | BPD group  | BPD mean  | BPD mean 79.2 |

|                                 |                                                                        |                                                                  |                                                                       |                                                                                         |                                                                     |                                                                       |                                                            |
|---------------------------------|------------------------------------------------------------------------|------------------------------------------------------------------|-----------------------------------------------------------------------|-----------------------------------------------------------------------------------------|---------------------------------------------------------------------|-----------------------------------------------------------------------|------------------------------------------------------------|
|                                 | SD 13.9                                                                | SD 13.5                                                          | SD 24.8                                                               | BPD mean 84.0<br>SD 9.1                                                                 | mean 94.7 SD<br>13.0                                                | 110.0<br>SD 48                                                        | SD 13.8                                                    |
| <b>Doyle</b> <sup>E6</sup>      | BPD group mean 81.1<br>SD 13.7,<br>Control group 97.9<br>SD 11.8       | BPD group mean 82.9<br>SD 15.4,<br>Control group 95.2<br>SD 12.6 | BPD group mean 60.4<br>SD 20.3,<br>Control group 85.6<br>SD 20.2      | FEV <sub>1</sub> /FVC<br>BPD group mean<br>87.9 SD 9.4,<br>Control group 91.4<br>SD 6.6 | BPD group<br>mean 97.5 SD<br>14.0,<br>Control group<br>98.5 SD 11.7 | BPD group<br>mean 141.0 SD<br>39.9,<br>Control group<br>112.2 SD 34.2 | X                                                          |
| <b>Giacoia</b> <sup>E8</sup>    | BPD group mean 72.7<br>SEM 6.1, Control<br>group<br>Mean 97.2, SEM 4.6 | X                                                                | BPD group mean 49.5<br>SEM 6.0, Control<br>group mean 88.5<br>SEM 7.1 | X                                                                                       | X                                                                   | X                                                                     | X                                                          |
| <b>Gross</b> <sup>E9</sup>      | BPD group mean 83<br>SD 17, Control group<br>mean 97 SD 12             | BPD group mean 93<br>SD 16, Control group<br>mean 103 SD 11      | BPD group mean 64<br>SD 24, Control group<br>mean 88 SD 21            | X                                                                                       | BPD group<br>mean 104 SD<br>14, Control<br>group mean<br>106 SD 13  | BPD group<br>mean 133 SD<br>41, Control<br>group mean<br>112 SD 38    | X                                                          |
| <b>Halvorsen</b> <sup>E10</sup> | BPD mean 81.4<br>SD 10.7<br>Control 98.6<br>SD 9.9                     | X                                                                | X                                                                     | X                                                                                       | X                                                                   | X                                                                     | X                                                          |
| <b>Smith</b> <sup>E11</sup>     | BPD mean 83 SD 12                                                      | BPD mean 95                                                      | BPD mean 67                                                           | X                                                                                       | X                                                                   | X                                                                     | X                                                          |
| <b>Jacob</b> <sup>E12,E13</sup> | BPD mean 63.6 SD<br>20.6,<br>Control mean 94.3 SD<br>8.3               | BPD mean 83.1 SD<br>18.2,<br>Control mean 99.1 SD<br>9.4         | BPD mean 40.3 SD<br>24.5,<br>Control X                                | FEV <sub>1</sub> /FVC<br>BPD mean 69.2 SD<br>9.0,<br>Control X                          | BPD mean<br>104.7 SD 13.2,<br>Control X                             | BPD mean<br>181.8 SD 84.3,<br>Control X                               | BPD mean 83.4<br>SD 10.5,<br>Control mean<br>100.7 SD 17.1 |
| <b>Kilbride</b> <sup>E15</sup>  | BPD mean 72 SD 15<br>Control group mean<br>91 SD 9                     | BPD mean 90 SD 16<br>Control group mean<br>96 SD 11              | BPD mean 67 SD 22<br>Control group mean<br>100 SD 17                  | FEV <sub>1</sub> /FVC<br>BPD mean 81 SD 8<br>Control group<br>mean 89 SD 5              | X                                                                   | X                                                                     | X                                                          |
| <b>Korhonen</b> <sup>E16</sup>  | Severe BPD group<br>mean 82<br>SD 13,                                  | X                                                                | X                                                                     | X                                                                                       | X                                                                   | X                                                                     | X                                                          |

|                                                                          |                                                              |                                                              |                                                  |                                                                |   |   |                                                                     |
|--------------------------------------------------------------------------|--------------------------------------------------------------|--------------------------------------------------------------|--------------------------------------------------|----------------------------------------------------------------|---|---|---------------------------------------------------------------------|
|                                                                          | Control group mean 99<br>SD 11, range 72-117                 |                                                              |                                                  |                                                                |   |   |                                                                     |
| <b>Mieskonen</b> <sup>E20</sup>                                          | BPD group mean 73.5<br>SD 12, Control group<br>101.7 SD 8.4  | BPD group mean 84.9<br>SD 10, Control group<br>104.5 SD 10.9 | X                                                | X                                                              | X | X | BPD group<br>mean 82.8 SD<br>23.2, Control<br>group 99.5 SD<br>11.6 |
| <b>Palta</b> <sup>E22</sup>                                              | BPD group mean 78<br>SD 13<br>Control group mean<br>97 SD 12 | BPD group mean 79<br>SD 18<br>Control group mean<br>99 SD 27 | X                                                | X                                                              | X | X | X                                                                   |
| <b>Berman</b> <sup>E71</sup>                                             | BPD group mean 63<br>SD 25                                   | BPD group mean 85<br>SD 21                                   | X                                                | X                                                              | X | X | X                                                                   |
| <b>Guimaraes</b> <sup>E27</sup><br>(Data as Medians<br>in paper)         | BPD group median 79<br>extremes 58-98                        | BPD group median 88<br>extremes 58-111                       | BPD group median 87<br>extremes 48-148           | FEV <sub>1</sub> /FVC<br>BPD group median<br>8.5 extremes 1-17 | X | X | X                                                                   |
| <b>Berggren Brostrom</b> <sup>E29</sup><br>(Data as Medians<br>in paper) | Severe BPD group<br>median 68, min max<br>44-71              | Severe BPD group<br>median 74, min max<br>54-89              | Severe BPD group<br>median 42, min max<br>19-123 | Given in litres                                                | X | X | X                                                                   |

Table E4a:- Description of the included articles preterm group (including studies with BPD) compared to term control group

| STUDY                         | QUALITY SCORE | OBJECTIVE                                                                                        | STUDY DESIGN    | STUDY GROUP                                               | CONTROL GROUP                                        | OUTCOME MEASURES |
|-------------------------------|---------------|--------------------------------------------------------------------------------------------------|-----------------|-----------------------------------------------------------|------------------------------------------------------|------------------|
| <b>Konefal</b> <sup>E73</sup> | 15            | To evaluate whether mild to moderate infant RDS requiring NCPAP during the neonatal period would | Cross sectional | 31 PT children treated with n-CPAP split into 2 groups by | 19 children > 36 weeks gestation treated with n-CPAP | Spirometry       |

|                                |    |                                                                                                                                                                                 |                 |                                                                                 |                                                             |                                                                                        |
|--------------------------------|----|---------------------------------------------------------------------------------------------------------------------------------------------------------------------------------|-----------------|---------------------------------------------------------------------------------|-------------------------------------------------------------|----------------------------------------------------------------------------------------|
|                                |    | have an impact on pulmonary function                                                                                                                                            |                 | gestation                                                                       |                                                             |                                                                                        |
| <b>Anand</b> <sup>E74</sup>    | 16 | To determine if VLBW is associated with reduced lung function and respiratory health in adolescence and if it is whether this impairment is associated with prematurity or IUGR | Cohort          | 128 VLBW ( $\leq 1500g$ )                                                       | 128 children assumed to be near to term                     | Spirometry<br>Questionnaires                                                           |
| <b>Fawke</b> <sup>E1</sup>     | 16 | To assess the degree of respiratory morbidity and in extremely premature children in relation to current clinical status and neonatal determinants.                             | Cohort study    | 182 EP ( $\leq 25$ weeks gestation)                                             | 161 classmate controls excluded classmates who were preterm | Spirometry<br>Post-bronchodilator response<br>Questionnaire                            |
| <b>Arad</b> <sup>E2</sup>      | 8  | To compare lung function following neonatal intensive respiratory care on the same children in infancy and childhood                                                            | Follow up study | 10 PT                                                                           | X                                                           | Spirometry                                                                             |
| <b>De Kleine</b> <sup>E3</sup> | 18 | Examine the effect of lung injury caused by IPPV for HMD on lung function in children                                                                                           | Follow up study | 40 PT ventilated for HMD (38 with LF results) and 38 PT non ventilated with HMD | 39 randomly selected pupils of a similar age                | Spirometry<br>Respiratory symptoms questionnaire<br>Review of follow up records for PT |
| <b>Doyle</b> <sup>E4</sup>     | 19 | To determine the respiratory health of children of birthweight $< 1501g$ , compared to NBW controls in adolescence                                                              | Cohort study    | 180 VLBW ( $< 1501g$ ) -169 with spirometry results                             | 42 NBW ( $> 2499g$ ), 39 with spirometry results            | Spirometry<br>Assessment of respiratory health                                         |
| <b>Burns</b> <sup>E75</sup>    | 16 | To investigate he fitness                                                                                                                                                       | Case-control    | 54 ELBW                                                                         | 55 term                                                     | Spirometry                                                                             |

|                                     |    |                                                                                                                                                                                                                                                               |                              |                                                                            |                                       |                                                                                    |
|-------------------------------------|----|---------------------------------------------------------------------------------------------------------------------------------------------------------------------------------------------------------------------------------------------------------------|------------------------------|----------------------------------------------------------------------------|---------------------------------------|------------------------------------------------------------------------------------|
|                                     |    | levels and motor competency of non-disabled ELBW children as they were reaching adolescence. It also aimed to determine whether a relationship exists between their motor competence and physical fitness independent of their growth and respiratory status. | study                        | (<1000g) – 53 with spirometry results                                      | controls – 51 with spirometry results | Movement Assessment Battery for Children<br>Cardio respiratory endurance           |
| <b>Doyle</b> <sup>E6</sup>          | 17 | To determine respiratory function at 8 years in ELBW, very PT children born in the 1990s compared with NBW controls                                                                                                                                           | Cohort                       | 298 ELBW (<1000g)/ very preterm (< 28 weeks gestation) 240 with LF results | 208 NBW (>2499g)                      | Spirometry<br>ISAAC questionnaire                                                  |
| <b>Evenson</b> <sup>E76</sup>       | 19 | To evaluate associations between LBW and body fat, BP, lung and endothelial function, and maximal oxygen uptake in young adults                                                                                                                               | Longitudinal follow up study | 37 PT with VLBW (<1501g)                                                   | 63 controls with NBW                  | Spirometry<br>Questionnaire<br>BP<br>Endothelial function<br>Maximal oxygen uptake |
| <b>Galdes-Sebaldt</b> <sup>E7</sup> | 11 | To evaluate the long-term effect of prematurity and/or HMD on pulmonary function and airway reactivity.                                                                                                                                                       | Follow up study              | 30 <1500g children split into 2 groups no HMD and HMD                      | 27 terms                              | Spirometry<br>Questionnaire<br>Airway reactivity                                   |
| <b>Gappa</b> <sup>E77</sup>         | 11 | To determine long term pulmonary sequelae of surfactant treatment in premature infants with RDS                                                                                                                                                               | Follow up study              | 40 children 25-30 weeks gestation split into 2 groups                      | X                                     | Spirometry<br>Questionnaire<br>Bronchial hyperreactivity                           |

|                                 |    |                                                                                                                                                                                                                                |                              |                                                                                                                 |                                                                                |                                                                                                                                         |
|---------------------------------|----|--------------------------------------------------------------------------------------------------------------------------------------------------------------------------------------------------------------------------------|------------------------------|-----------------------------------------------------------------------------------------------------------------|--------------------------------------------------------------------------------|-----------------------------------------------------------------------------------------------------------------------------------------|
|                                 |    |                                                                                                                                                                                                                                |                              | 29 with LF results                                                                                              |                                                                                |                                                                                                                                         |
| <b>Grischkan</b> <sup>E78</sup> | 19 | To assess the role of in utero and perinatal exposures in modifying asthma risk among children born prematurely                                                                                                                | Cohort study                 | 251 preterm children ( $\leq 36$ weeks) split over 2 groups asthma, no asthma groups                            | X                                                                              | Spirometry<br>Questionnaire                                                                                                             |
| <b>Gross</b> <sup>E9</sup>      | 19 | To assess long-term pulmonary outcome of a regional cohort of children born $< 32$ weeks' gestation compared with a matched term control group                                                                                 | Cohort                       | 125 PT children born at 24 to 31 weeks gestation - 96 had spirometry results split into 2 groups BPD and no BPD | 108 healthy term (38 to 42 weeks gestation) controls                           | Spirometry<br>Bronchodilator responsiveness<br>Ongoing health problems<br>Rehospitalisation<br>Respiratory symptoms<br>Exercise testing |
| <b>Kennedy</b> <sup>E14</sup>   | 15 | To assess the importance of the contributions of birth weight, gestational age, neonatal respiratory illness, and its treatment on subsequent childhood lung function in a cohort of children of birth weight less than 1500g. | Cohort study                 | VLBW cohort ( $< 1500$ g) 102 children                                                                          | 82 control children , 1 birth weight $< 2$ kg, 2 born at 36 weeks rest at term | Spirometry<br>Respiratory questionnaire                                                                                                 |
| <b>Kilbride</b> <sup>E15</sup>  | 14 | To assess pulmonary function and exercise capacity of apparently asymptomatic children who were born EP                                                                                                                        | Longitudinal follow up study | 50 ELBW children $< 801$ g                                                                                      | 25 age matched NBW children $> 37$ weeks gestation and $> 2500$ g BW           | Medical history and recent Hospitalisations<br>Spirometry<br>Exercise testing                                                           |
| <b>Baraldi</b> <sup>E17</sup>   | 12 | To assess the cardio-respiratory and metabolic response to exercise in                                                                                                                                                         | Area cohort study            | 15 VLBW children ( $< 1501$ g)                                                                                  | 26 born at term but data not given for                                         | Spirometry<br>Questionnaire<br>Exercise testing                                                                                         |

|                                 |    |                                                                                                                                                                                                     |                           |                                                                          |                                   |                                                                                                                                                          |
|---------------------------------|----|-----------------------------------------------------------------------------------------------------------------------------------------------------------------------------------------------------|---------------------------|--------------------------------------------------------------------------|-----------------------------------|----------------------------------------------------------------------------------------------------------------------------------------------------------|
|                                 |    | VLBW children and to compare exercise performance in AGA versus SGA                                                                                                                                 |                           |                                                                          | spirometry                        |                                                                                                                                                          |
| <b>Wagner</b> <sup>E79</sup>    | 11 | Purpose of the study was to compare the 88% SAT test with spirometry in young children with regard to completion success rate, abnormality, and questionnaire response regarding respiratory health | Follow up study           | From 33 PT children with history of RDS<br>20 had results                | X                                 | Spirometry<br>Questionnaire                                                                                                                              |
| <b>Mai</b> <sup>E80</sup>       | 11 | To assess the relationship between VLBW and the development of asthma, lung function and atopy                                                                                                      | Cohort study              | 74 VLBW ( $\leq 1500g$ )                                                 | 64 term born NBW ( $\geq 2500g$ ) | Spirometry<br>Questionnaire<br>Skin prick tests<br>Hypertonic saline provocation tests<br>Cell stimulation<br>Cytokine analyses<br>IgE antibody analyses |
| <b>MacLusky</b> <sup>E81</sup>  | 10 | To identify the incidence and possible factors contributing to the development of long term abnormalities in pulmonary function                                                                     | Longitudinal cohort study | 48 PT children <33 weeks<br>47 with spirometry                           | X                                 | Spirometry<br>Metacholine challenge                                                                                                                      |
| <b>Mieskonen</b> <sup>E20</sup> | 13 | To evaluate the possible inflammatory basis of lung function abnormalities                                                                                                                          | Cohort study              | 40 children with a gestational age $\leq 30$ weeks or birthweight <1500g | 14 term controls                  | Spirometry<br>Questionnaires<br>Skin Prick Tests<br>Measurement of exhaled nitric oxide<br>Spirometry before and after Salbutamol                        |



|                                  |    |                                                                                                                                                                              |                                     |                                                                                      |                                  |                                                                          |
|----------------------------------|----|------------------------------------------------------------------------------------------------------------------------------------------------------------------------------|-------------------------------------|--------------------------------------------------------------------------------------|----------------------------------|--------------------------------------------------------------------------|
| <b>Odberg</b> <sup>E82</sup>     | 12 | To compare trajectories for growth and somatic health characteristics until adulthood of non-handicapped LBW and NBW children                                                | Population based longitudinal study | 134 LBW (<2kg) children                                                              | 135 term NBW (>3kg) children     | Spirometry<br>Questionnaire<br>BP                                        |
| <b>Rivlin</b> <sup>E83</sup>     | 9  | To study the long term outcomes of children with Wilson-Mikity syndrome                                                                                                      | Cohort study                        | 9 PT children with Wilson-Mikity syndrome 8 with spirometry results                  | X                                | Spirometry<br>Follow up history<br>Inhalation challenge with metacholine |
| <b>Wiebicke</b> <sup>E84</sup>   | 10 | To assess outcomes after antenatal versus no antenatal steroid therapy.                                                                                                      | RCT follow up                       | 20 PT children given dex or placebo                                                  | X                                | Spirometry                                                               |
| <b>Von Mutius</b> <sup>E85</sup> | 12 | To investigate the significance of gestational age, birth weight, mechanical ventilation after birth, and a family history of asthma for the development of childhood asthma | Cross sectional study               | 253 PT children LF results for 118 females given                                     | 2113 term girls                  | Spirometry<br>Questionnaire<br>Cold air challenge<br>Skin prick tests    |
| <b>Palta</b> <sup>E22</sup>      | 15 | To determine lung function at 10 years in VLBW children and controls                                                                                                         | Cohort study                        | 265 VLBW children ≤ 1500g                                                            | 360 unselected controls          | Spirometry<br>Home spirometry                                            |
| <b>Smith</b> <sup>E86</sup>      | 14 | To assess the 10 year lung function and fitness outcomes for children who were born weighing <1000g and before 32 weeks gestation                                            | Cross sectional study               | 126 children who were born weighing <1000g and before 32 weeks gestation 123 with LF | 34 control children born at term | Spirometry<br>Fitness assessment                                         |

|                                 |    |                                                                                                                                                                         |                          |                                                                                    |                                                              |                                                                       |
|---------------------------------|----|-------------------------------------------------------------------------------------------------------------------------------------------------------------------------|--------------------------|------------------------------------------------------------------------------------|--------------------------------------------------------------|-----------------------------------------------------------------------|
|                                 |    |                                                                                                                                                                         |                          | results                                                                            |                                                              |                                                                       |
| <b>Telford</b> <sup>E87</sup>   | 10 | The outcome in late childhood for children entered into a randomised trial of CNEP versus standard respiratory management for the treatment of RDS.                     | Cohort study             | 133 PT children split into 2 groups 130 with LF results                            | X                                                            | Spirometry<br>Questionnaire<br>LF pot bronchodilator                  |
| <b>Siltanen</b> <sup>E88</sup>  | 12 | To evaluate the association between atopy, wheezing and impaired respiratory function in children born very preterm compared to term controls                           | Cohort study             | 72 PT children birth weight <1501g 50 with LF results                              | 65 full term children birth weight >2500g 54 with LF results | Spirometry<br>Questionnaire<br>Skin prick testing<br>Exercise testing |
| <b>Gross</b> <sup>E89</sup>     | 11 | To study growth, neurodevelopmental, and pulmonary outcomes at adolescence in children who had participated in a double-blind placebo-controlled trial of dexamethasone | RCT follow up            | 22 PT children (birthweight ≤1250g, gestational age ≤ 30 weeks) 20 with LF results | X                                                            | Spirometry<br>Neurodevelopmental outcome                              |
| <b>Vrijlandt</b> <sup>E24</sup> | 14 | To investigate the long term effects of prematurity on lung function and exercise capacity                                                                              | Prospective cohort study | 42 PT (gestational age <32 weeks and/or birthweight under 1500g)                   | 48 healthy term controls                                     | Spirometry<br>Exercise testing                                        |
| <b>Nikolajev</b> <sup>E90</sup> | 7  | To quantify the separate effects of prematurity and IUGR on lung volumes and airway flow values.                                                                        | Cohort study             | Authors supplied information on 45 children ≤36 weeks gestation                    | X                                                            | Spirometry<br>Questionnaire                                           |

|                                   |    |                                                                                                                                                                                                         |                                  |                                                                  |                                                               |                                 |
|-----------------------------------|----|---------------------------------------------------------------------------------------------------------------------------------------------------------------------------------------------------------|----------------------------------|------------------------------------------------------------------|---------------------------------------------------------------|---------------------------------|
| <b>Bertrand</b> <sup>E91</sup>    | 14 | To assess the respective roles of prematurity, RDS and its treatment, and familial airway hyper reactivity in the pathogenesis of long term pulmonary sequelae in children who survive premature birth. | Retrospective case-control study | 11 syndrome group, 11 no disease group                           | 11 syndrome group siblings, 11 no disease siblings, 9 control | Spirometry<br>Airway reactivity |
| <b>Borkenstein</b> <sup>E92</sup> | 13 | To investigate pulmonary function in long term survivors of artificial ventilation in the neonatal period.                                                                                              | Cohort study                     | 11 children who had ventilation<br>6 PT children with LF results | X                                                             | Spirometry                      |
| <b>Abreu</b> <sup>E26</sup>       | 14 | To investigate cardio respiratory capacity and investigate the presence of exercise-induced bronchospasm among children with BPD                                                                        | Case control study               | 26 PT children<br>23 with LF results                             | 20 term children 17 with LF results                           | Spirometry<br>Exercise testing  |

**Table E4b:- Demographics of the included articles preterm group (including studies with BPD) compared to term control group**

| <b>STUDY COUNTRY</b>                           | <b>SUBJECTS (GENDER)</b> | <b>GA (WEEKS)</b>    | <b>BW (GRAMS)</b> | <b>DURATION ON MECHANICAL VENTILATION (DAYS)</b> | <b>AGE TESTED (YEARS)</b> | <b>YEAR OF BIRTH</b> | <b>SURFACTANT GIVEN</b> | <b>METHOD OF MEASURING LUNG FUNCTION</b> | <b>METHOD OF STANDARDISING LUNG FUNCTION MEASUREMENTS</b> |
|------------------------------------------------|--------------------------|----------------------|-------------------|--------------------------------------------------|---------------------------|----------------------|-------------------------|------------------------------------------|-----------------------------------------------------------|
| <b>Konefal</b> <sup>E73</sup><br><b>Poland</b> | PT group 28-32 weeks     | PT group 28-32 weeks | PT group 28-32    | PT group 28-32 weeks                             | PT group 28-32 weeks      | 1990-2000            | X                       | Lungtest 500, MES, Cracow Poland         | Expressed as percentage                                   |

|                                   |                                                                                     |                                                                                                     |                                                                                                                                                            |                                                                                                                                   |                                                                                                   |         |   |                                             |                                                  |
|-----------------------------------|-------------------------------------------------------------------------------------|-----------------------------------------------------------------------------------------------------|------------------------------------------------------------------------------------------------------------------------------------------------------------|-----------------------------------------------------------------------------------------------------------------------------------|---------------------------------------------------------------------------------------------------|---------|---|---------------------------------------------|--------------------------------------------------|
|                                   | gestation (4M,3F), PT group 33-36 weeks gestation (10M,14F), Control group (10M,9F) | gestation mean 30.3 SD 1.5, PT group 33-36 weeks mean 35.2 SD 1.05, Control group mean 38.5 SD 1.17 | weeks gestation mean 1629 SD 339, range 1300-2100. PT group 33-36 weeks mean 2455 SD 547, range 1500-3680, Control group mean 3235 SD 496, range 2270-4100 | gestation mean 4.4 SD 3.1, range 2-10. PT group 33-36 weeks mean 2.4 SD 1.6, range 1-7, Control group mean 2.6 SD 2.3, range 1-10 | gestation mean 9.57 SD 3.7, PT group 33-36 weeks mean 10.4 SD 2.8, Control group mean 10.4 SD 2.7 |         |   |                                             | predicted <sup>E93</sup>                         |
| <b>Anand<sup>E74</sup><br/>UK</b> | VLBW group (72M,56F)<br>Control group (72M,56F)                                     | VLBW mean 30.7, SD 2.7, range 26-36<br>Control group assumed to be near to term                     | VLBW mean 1249, SD 185.2, range 630-1500<br>Control group mean 3338, SD 507.6, range 2098-4550                                                             | VLBW group 83 received respiratory support                                                                                        | 15                                                                                                | 1980-81 | X | Portable spirometer<br>Vitalograph-Alpha-II | Expressed as percentage predicted <sup>E94</sup> |

|                                                             |                                                                                                                    |                                                                                                                        |                                                                                                                           |                                                                                                                                               |                                                                                                                                             |               |                          |                                                                                                          |                                                                                                              |
|-------------------------------------------------------------|--------------------------------------------------------------------------------------------------------------------|------------------------------------------------------------------------------------------------------------------------|---------------------------------------------------------------------------------------------------------------------------|-----------------------------------------------------------------------------------------------------------------------------------------------|---------------------------------------------------------------------------------------------------------------------------------------------|---------------|--------------------------|----------------------------------------------------------------------------------------------------------|--------------------------------------------------------------------------------------------------------------|
| <b>Fawke<sup>E1</sup></b><br><b>UK and Ireland</b>          | EP (43% M),<br>Controls (43%<br>M)                                                                                 | EP mean<br>25.0, SD 0.7<br>Control X<br>excluded if<br>preterm                                                         | EP mean<br>750, SD<br>120,<br>Controls X                                                                                  | X                                                                                                                                             | Range 10.1<br>to 12.1.<br>EP mean<br>10.9, SD<br>0.38.<br>Controls<br>mean 10.9<br>SD 0.55.                                                 | 1995          | EP 153/182<br>Controls X | Portable spirometer<br>(Jaeger Masterscope,<br>Lab Manager, V4.65;<br>CareFusion,<br>Hoechberg, Germany) | Spirometry data<br>were expressed as<br>z-scores to adjust<br>for height, age and<br>sex <sup>E30, E31</sup> |
| <b>Arad<sup>E2</sup></b><br><b>Israel</b>                   | X                                                                                                                  | PT group<br>mean 30.4,<br>range 28-35                                                                                  | PT 1257g<br>Range 900-<br>1900                                                                                            | 8 for between<br>1 and 11 days,<br>4 being<br>ventilated for<br>4 or more days                                                                | Mean 6.8 SD<br>0.6                                                                                                                          | 1977-<br>1979 | X                        | Pneumotachograph-<br>based system<br>(Hewlett-Packard<br>47120A Pulmonary<br>Desk System)                | Expressed as<br>percentage<br>predicted <sup>E32</sup>                                                       |
| <b>De Kleine<sup>E3</sup></b><br><b>The<br/>Netherlands</b> | 11 BPD<br>(8M,3F) 29<br>non BPD<br>(19M, 10F),<br>38 non<br>ventilated<br>(24M, 14F),<br>39 controls<br>(20M, 19F) | BPD mean<br>30.6<br>SD 2.0,<br>Non BPD<br>mean 32.2<br>SD 1.8, Non<br>ventilated<br>mean 31.8<br>SD 1.9,<br>Controls X | BPD mean<br>1673<br>SD 340,<br>Non BPD<br>mean 1952<br>SD 460,<br>Non<br>ventilated<br>mean 1809<br>SD 419,<br>Controls X | BPD mean 9.0<br>days (range<br>1.8-36),<br>Non BPD<br>29/29 mean<br>2.9 days<br>(range 0.8-<br>6.9), non<br>ventilated<br>0/38,<br>Controls X | BPD mean<br>13.4<br>SD 3.1,<br>Non BPD<br>mean 12.3<br>SD 2.9, Non<br>ventilated<br>mean 12.8<br>SD 2.7,<br>Controls<br>mean 13.7<br>SD 1.6 | 1967-<br>1977 | X                        | Water sealed<br>spirometer (Lode<br>instruments,<br>Groningen,<br>Netherlands)                           | Lung function as<br>percentage<br>predicted for sex<br>and height <sup>E32, E33</sup>                        |
| <b>Doyle<sup>E4</sup></b><br><b>Australia</b>               | 500-999g<br>group (35M,<br>43F), 1000-<br>1500g group<br>(55m, 47F)<br>>2499g group                                | 500-999g<br>group mean<br>27.5 SD 2.3,<br>1000-1500g<br>group mean<br>29.6 SD 1.5,                                     | 500-999g<br>group<br>mean 859<br>SD 100,<br>1000-<br>1500g                                                                | X                                                                                                                                             | 500-999g<br>group mean<br>14.1 SD 0.2,<br>1000-1500g<br>group mean<br>14.2 SD 0.3,                                                          | 1977-<br>1982 | Not given                | Jaeger Bodyscreen II-<br>Bodybox (Jaeger,<br>Germany)                                                    | Lung function as<br>percentage<br>predicted for age,<br>height and gender<br><sup>E34</sup>                  |

|                                                 |                                                           |                                                                                  |                                                                                        |                         |                                                                                                                  |               |                                         |                                                                                     |                                                                                                 |
|-------------------------------------------------|-----------------------------------------------------------|----------------------------------------------------------------------------------|----------------------------------------------------------------------------------------|-------------------------|------------------------------------------------------------------------------------------------------------------|---------------|-----------------------------------------|-------------------------------------------------------------------------------------|-------------------------------------------------------------------------------------------------|
|                                                 | (26M, 16F)                                                | >2499g<br>group mean<br>39.9 SD 1.0                                              | group<br>mean 1259<br>SD 145,<br>>2499g<br>group<br>mean 3420<br>SD 427                |                         | >2499g<br>group mean<br>14.2 SD 0.1                                                                              |               |                                         |                                                                                     |                                                                                                 |
| <b>Burns</b> <sup>E75</sup><br><b>Australia</b> | ELBW<br>(31M,23F)<br>Controls<br>(28M,27F)                | ELBW mean<br>26.6 SD 2.1<br>Controls at<br>least 37<br>weeks                     | ELBW<br>mean 769g<br>SD 148<br>Controls X                                              | X                       | ELBW mean<br>12 years 6<br>months SD 8<br>months,<br>control<br>children 12<br>years 5<br>months SD<br>11 months | 1992-<br>1994 | X                                       | Spirobank (Medical<br>International<br>Research ISO 9001, EN<br>46001; Rome, Italy) | Lung function as<br>percentage<br>predicted <sup>x</sup>                                        |
| <b>Doyle</b> <sup>E6</sup><br><b>Australia</b>  | ELBW<br>(129F,111M),<br>Control group<br>(98M, 110F)      | ELBW group<br>mean 26.7,<br>SD 1.9<br>Control<br>group X                         | ELBW<br>group<br>mean 885,<br>SD 159,<br>Control<br>group<br>Control<br>group<br>>2499 | X                       | 8-9                                                                                                              | 1991-<br>1992 | In whole PT<br>cohort 92/240<br>treated | Jaeger Body-screen II<br>Bodybox (Jaeger,<br>Germany)                               | Results expressed<br>as percentage<br>predicted for age,<br>height and gender<br><sup>E34</sup> |
| <b>Evenson</b> <sup>E76</sup><br><b>Norway</b>  | VLBW group<br>37 (20M, 17F),<br>Controls 63<br>(29M, 34F) | VLBW group<br>median 28,<br>range 24-35,<br>Control<br>median 40,<br>range 37-42 | VLBW<br>group<br>median<br>1245,<br>range 800-<br>1500,                                | VLBW X,<br>Control 0/63 | VLBW group<br>mean 18.2,<br>SE 0.1,<br>Control<br>group mean<br>18.6 SE 0.1                                      | 1986-<br>1988 | X                                       | Master screen<br>spirometer (Jaeger,<br>GmbH and Co, KG)                            | Expressed as<br>percentage<br>predicted adjusted<br>for sex <sup>x</sup>                        |

|                                                  |                                                                             |                                                                                                                                                 |                                                                                                                                                        |                                                  |                                                                                                         |           |                                            |                                                                                            |                                                                                                             |
|--------------------------------------------------|-----------------------------------------------------------------------------|-------------------------------------------------------------------------------------------------------------------------------------------------|--------------------------------------------------------------------------------------------------------------------------------------------------------|--------------------------------------------------|---------------------------------------------------------------------------------------------------------|-----------|--------------------------------------------|--------------------------------------------------------------------------------------------|-------------------------------------------------------------------------------------------------------------|
|                                                  |                                                                             |                                                                                                                                                 | Control median<br>3700,<br>range<br>2670-5140                                                                                                          |                                                  |                                                                                                         |           |                                            |                                                                                            |                                                                                                             |
| <b>Galdes-Sebaldt<sup>E7</sup></b><br><b>USA</b> | <1500g no HMD group (11M, 8F), <1500g HMD group (3M,8F) Controls (14M, 13F) | <1500g no HMD group mean 29.3, SEM 0.4, range 26-32, <1500g HMD group mean 29.5, SEM 0.6, range 26-32, Controls mean 39.9, SEM 0.2, range 38-42 | <1500g no HMD group mean 1044, SEM 30, range 900-1290, <1500g HMD group mean 1217, SEM 34, range 964-1361, Controls mean 3429, SEM 64, range 2707-4111 | <1500g no HMD 13/19, <1500g HMD 9/11, Controls X | <1500g no HMD group mean 11.1, SEM 0.2, <1500g HMD group mean 11.2, SEM 0.2, Controls mean 11.6 SEM 0.2 | 1973-1977 | X                                          | Automated pulmonary function lab model M100B (SRL Medical Inc, Dayton, OH)                 | Results as percentage predicted adjusted for height and sex <sup>E35</sup> and ethnicity <sup>E36</sup>     |
| <b>Gappa<sup>E77</sup></b><br><b>Germany</b>     | Surfactant group (13M,9F), Placebo group (6M, 12F)                          | Surfactant group mean 28.1 SD 1.5, Placebo group mean 27.2, SD 1.3                                                                              | Surfactant group mean 1114 SD 271, Placebo group mean 1043, SD 237                                                                                     | X                                                | Surfactant group mean 6.63 SD 0.18, Placebo 6.55 SD 0.23                                                | 1987-1988 | 22/22 Surfactant group, 0/18 placebo group | Ganshorn, Niederluer, Germany in Hannover and Jaeger, Wurzburg, Germany in Ulm and Hamburg | Expressed as percentage predicted reference values appropriate for gender, height and weight <sup>E95</sup> |

|                                                  |                                                                        |                                                                                   |                                                                                           |                                                                  |                                                               |           |   |                                                                              |                                                                                                                                                                                  |
|--------------------------------------------------|------------------------------------------------------------------------|-----------------------------------------------------------------------------------|-------------------------------------------------------------------------------------------|------------------------------------------------------------------|---------------------------------------------------------------|-----------|---|------------------------------------------------------------------------------|----------------------------------------------------------------------------------------------------------------------------------------------------------------------------------|
| <b>Grischkan<sup>E78</sup></b><br><b>USA</b>     | Asthma group 59.8% male, no asthma group 46.1% male                    | Asthma group mean 30.2 SD 3.1, No asthma mean 31.8 SD 3.0                         | Asthma group mean 1437.1 SD 572.8, No asthma mean 1620.2 SD 549.4                         | Asthma group 86.7% ventilated, No asthma group 62.3% ventilated  | Asthma group mean 9.4 SD 0.8, No asthma group mean 9.3 SD 0.8 | 1988-1993 | X | Spirometry performed in the sitting position(x)                              | As percentage predicted adjusted for age, sex and height <sup>E37</sup> . Values for African American children were further adjusted by multiplying the predicted value by 0.85. |
| <b>Gross<sup>E9</sup></b><br><b>USA</b>          | No BPD group (27M, 26F), BPD group (23M, 20F) Control group (62M, 46F) | No BPD group mean 29 SD 2, BPD group mean 27 SD 2, Control group mean 40.1 SD 1.1 | No BPD group mean 1270 SD 306, BPD group mean 1053 SD 356, Control group mean 3565 SD 427 | 55% of no BPD group median 6 95% of BPD group median 34          | 7                                                             | 1985-1986 | 0 | SensorMedics 2200 Pulmonary Function Equipment (SensorMedics, Anaheim Calif) | Results as percentage predicted for age, height and sex <sup>E37</sup> ,<br><sup>E38</sup>                                                                                       |
| <b>Kennedy<sup>E14</sup></b><br><b>Australia</b> | VLBW group (47M, 55F) Control group (39M, 43F)                         | VLBW group mean 29.6 SD 2.8, Control mean 40.0 SD 1.6                             | VLBW group mean 1160.1 SD 227.1, Control group mean 3459.1 SD 509.0                       | Duration of IPPV VLBW group median 3.9 IQR 0.2, 14.3 Control n/a | VLBW group mean 11.3 SD 0.8, Control 11.4 SD 0.8              | 1981-1982 | X | Pulmonary function testing was performed using the Jaeger Masterlab system   | Results were evaluated as percentage predicted for gender and height <sup>E34</sup>                                                                                              |
| <b>Kilbride<sup>E15</sup></b>                    | All ELBW                                                               | ELBW mean                                                                         | ELBW                                                                                      | ELBW mean 33                                                     | ELBW group                                                    | 1983-     | X | SensorMedics (Yorba                                                          | Expressed as a                                                                                                                                                                   |



|                                            |                                              |                                                                      |                                                            |                                                                         |                                                                                             |               |   |                                                                      |                                                                           |
|--------------------------------------------|----------------------------------------------|----------------------------------------------------------------------|------------------------------------------------------------|-------------------------------------------------------------------------|---------------------------------------------------------------------------------------------|---------------|---|----------------------------------------------------------------------|---------------------------------------------------------------------------|
| <b>USA</b>                                 | (16M, 34F)<br>Control (11M, 14F)             | 26.1 SD 1.6<br>NBW >37                                               | mean 701<br>SD 80<br>NBW<br>>2500                          | days SD 20<br>range 0-78                                                | mean 11.3,<br>SD 1.6<br>NBW mean<br>11.1 SD 1.3                                             | 1989          |   | Linda, CA), 922 dry,<br>rolling seal spirometer                      | percentage<br>predicted <sup>X</sup>                                      |
| <b>Baraldi<sup>E17</sup><br/>Italy</b>     | VLBW (6M,<br>9F)                             | VLBW mean<br>32.1 SD 3.0<br>range 28-37                              | VLBW<br>mean 1287<br>SD 143<br>range<br>1000-1500          | 7/15 duration<br>1-8 days                                               | VLBW mean<br>9.9 SD 1.8<br>range 7.8-<br>12.2                                               | 1976-<br>1979 | X | 101 water spirometer<br>(Biomedin, Padova,<br>Italy)                 | Expressed as<br>percentage of<br>reference values<br><sup>E35</sup>       |
| <b>Wagner<sup>E79</sup><br/>USA</b>        | PT group<br>(16M, 17F)                       | PT group<br>Mean 28.3<br>SD 2.3 range<br>25-34                       | PT group<br>Mean 1055<br>SD 317                            | Duration mean<br>30 days SD 25                                          | 5-7 mean 5.9<br>SD 0.7                                                                      | X             | X | Medical Graphics<br>model 1070                                       | Lung function as<br>percentage<br>predicted <sup>E62, E96, E97</sup>      |
| <b>Mai<sup>E80</sup><br/>Sweden</b>        | VLBW (44M,<br>30F), controls<br>(33m, 31F)   | VLBW mean<br>31 SD 2<br>range 25-36,<br>controls<br>term             | VLBW<br>group<br>≤1500g,<br>controls ≥<br>2500g            | VLBW group<br>13/74                                                     | VLBW mean<br>12.6 SD 0.2,<br>Controls<br>mean 12.7<br>SD 0.3                                | 1987-<br>1988 | 0 | MasterScope<br>spirometer (Jaeger,<br>Wurzberg, Germany)             | Expressed as a<br>percentage of the<br>reference values<br><sup>E61</sup> |
| <b>MacLusky<sup>E81</sup><br/>Canada</b>   | PT (22F, 26M)                                | PT mean<br>29.2 SD 2.1                                               | PT mean<br>1166 SD<br>193                                  | 30/48 required<br>IPPB mean 109<br>hours SD 236                         | Mean 9.1 SD<br>0.6                                                                          | 1974-<br>1975 | X | Systems 80<br>computerized<br>spirometer, Gould Inc,<br>Dayton, Ohio | Expressed as a<br>percentage of<br>predicted <sup>E62</sup>               |
| <b>Mieskonen<sup>E20</sup><br/>Finland</b> | PT group<br>(19M, 21F)<br>Control group<br>X | PT group<br>median 27.9,<br>range 24.1-<br>30.9,<br>Controls<br>term | PT group<br>median<br>990, range<br>600-1575<br>Controls X | 39/40 PT<br>children<br>ventilated,<br>median 10<br>days range 0-<br>75 | PT group<br>median 8.3<br>range 7.5-<br>9.6<br>Controls<br>median 8.9<br>range 5.3-<br>11.2 | 1989-<br>1991 | X | Spirotrac III,<br>Vitalograph Ltd,<br>Buckingham, UK)                | Expressed as<br>percentage<br>predicted <sup>E35</sup>                    |
| <b>Odberg<sup>E82</sup><br/>Norway</b>     | LBW<br>(61M, 73F),<br>NBW                    | LBW group<br>mean 32.2<br>SD 33 NBW                                  | LBW group<br>mean<br>1544g SD                              | X                                                                       | Mean age of<br>both groups<br>18 years and                                                  | 1986-<br>1988 | X | Vmax 22 spirometer<br>(SensorMedics Inc,<br>Anaheim, CA, USA)        | Expressed as a<br>percentage<br>predicted <sup>E47</sup>                  |

|                                                    |                                 |                                                                             |                                                    |                                                                                                              |                                                                                  |               |                                                                                  |                                                                              |                                                                                                          |
|----------------------------------------------------|---------------------------------|-----------------------------------------------------------------------------|----------------------------------------------------|--------------------------------------------------------------------------------------------------------------|----------------------------------------------------------------------------------|---------------|----------------------------------------------------------------------------------|------------------------------------------------------------------------------|----------------------------------------------------------------------------------------------------------|
|                                                    | (64M,71F)                       | term                                                                        | 369 NBW<br>>3kg                                    |                                                                                                              | 11 months                                                                        |               |                                                                                  |                                                                              |                                                                                                          |
| <b>Rivlin</b> <sup>E83</sup><br><b>Canada</b>      | PT (4M,5F)                      | PT mean<br>29.1, range<br>27-32                                             | PT mean<br>1175.4,<br>range 920-<br>1435           | 3/9 required<br>mech vent for<br>5-6 days, and<br>CPAP for 3-8<br>days, 2/9<br>required CPAP<br>for 3-7 days | Mean 7.6 SD<br>0.3                                                               | 1974-<br>1975 | X                                                                                | Collins 9 liter<br>respirometer                                              | Expressed as<br>percentage<br>predicted <sup>E62</sup>                                                   |
| <b>Wiebicke</b> <sup>E84</sup><br><b>Canada</b>    | PT children<br>(12M, 8F)        | Dex group<br>mean 32.8<br>SEM 0.4,<br>Placebo<br>group mean<br>32.2 SEM 0.6 | X                                                  | X                                                                                                            | Age of dex<br>group mean<br>7.5 SEM 0.3,<br>placebo<br>group mean<br>7.5 SEM 0.3 | 1976          | X                                                                                | 9 liter water-sealed<br>spirometer (Collins,<br>Braintree, MD)               | Results expressed<br>as percentage of<br>predicted values<br><sup>E67, E 97</sup>                        |
| <b>Von Mutius</b> <sup>E85</sup><br><b>Germany</b> | All female                      | PT <37<br>weeks,<br>Controls<br>term                                        | Mean not<br>given                                  | 40/108<br>received<br>ventilatory<br>support                                                                 | Controls<br>mean 10<br>SEM 0, PT<br>mean 10.1<br>SEM 0.1                         | X             | X                                                                                | Pneumoscope II<br>spirometer (Jager,<br>Wurzburg, Germany)                   | Results as<br>percentage<br>predicted<br>reference<br>population<br>consisted of 2337<br>German children |
| <b>Palta</b> <sup>E22</sup><br><b>USA</b>          | VLBW 49% M<br>Controls 56%<br>M | VLBW group<br>mean 29 SD<br>2.5, Controls<br>X                              | VLBW<br>group<br>mean 1123<br>SD 250<br>Controls X | X                                                                                                            | VLBW mean<br>10.4 SD 0.42,<br>controls<br>mean 9.6 SD<br>0.72                    | 1988-<br>1991 | Varying<br>percentages of<br>children given<br>surfactant<br>across the<br>years | Jaeger AM1 portable<br>electronic peak flow<br>meter                         | Expressed as<br>percentage<br>predicted ratios <sup>E46</sup>                                            |
| <b>Smith</b> <sup>E86</sup><br><b>Australia</b>    |                                 | PT mean<br>26.9 SD 1.7,<br>Controls<br>mean 39.4<br>SD 1.2                  | PT mean<br>862.4 SD<br>160.9,<br>Controls<br>mean  | PT 100<br>required<br>intubation                                                                             | PT mean<br>10.1 SD 1.1,<br>Control<br>group mean<br>11.6 SD 0.8                  | 1992-<br>1994 | X                                                                                | Sensormedics Vmax<br>V62J Autobox<br>(Sensormedics Corp,<br>Yorba Linda, CA) | Expressed as<br>percentage<br>predicted <sup>E40, E35, E41</sup>                                         |

|                                                    |                                              |                                                                                                       |                                                                                                                 |                                                                                                                               |                                                                                         |               |          |                                                      |                                                                                            |
|----------------------------------------------------|----------------------------------------------|-------------------------------------------------------------------------------------------------------|-----------------------------------------------------------------------------------------------------------------|-------------------------------------------------------------------------------------------------------------------------------|-----------------------------------------------------------------------------------------|---------------|----------|------------------------------------------------------|--------------------------------------------------------------------------------------------|
|                                                    |                                              |                                                                                                       | 3400.5, SD 512.5                                                                                                |                                                                                                                               |                                                                                         |               |          |                                                      |                                                                                            |
| <b>Telford<sup>E87</sup><br/>UK</b>                | PT (79M, 54F)                                | PT median 31 IQR 29-33                                                                                | PT median 1.59, IQR 1.17-2.04                                                                                   | 91/133 intubated at study entry                                                                                               | Median 11.3, 9.6-14.9                                                                   | X             | 41/127   | Vitalograph Spirometer 2120, Ennis, Ireland)         | Expressed as percentage predicted <sup>x</sup>                                             |
| <b>Siltanen<sup>E88</sup><br/>Finland</b>          | PT (46M, 26F), Control (34M, 31F)            | PT group mean 28.5, SD 2.4, range 23.4-33.7 Control group term                                        | PT mean 1075, control group 3593                                                                                | X                                                                                                                             | PT group mean 10.1 SD 0.3 range 9.6-10.8, control group mean 10.1 SD 0.4 range 9.4-10.9 | 1987-1988     | PT 19/72 | Vitalograph Compact Spirometer (Vitalograph Ltd, UK) | Expressed as percentage predicted <sup>E37</sup>                                           |
| <b>Gross<sup>E89</sup><br/>USA</b>                 | All PT (9M, 13F)                             | 42 day dex mean 26 (95% CI 25,27), 18 day dex 26 (95% CI 24,28), control group mean 27 (95% CI 24,29) | 42 day dex mean 851 (95% 776,926), 18 day dex 810 (95% CI 620, 1000), control group mean 948 (95% CI 721, 1175) | 42 day dex mean 31 days (95% CI 23, 40), 18 day dex mean 114 days (95% CI 39,188), control group mean 75 days (95% CI 44-106) | 14.5-15.5                                                                               | X             | X        | SensorMedics 2200 (SensorMedics, Anaheim, CA)        | Results as percentage predicted on the basis of height, age and gender <sup>E37, E38</sup> |
| <b>Vrijlandt<sup>E24</sup><br/>The Netherlands</b> | PT group (21M, 21F) Control group (16M, 32F) | Whole PT group mean 30 SD 2, range 26-36, Control                                                     | Whole PT group mean 1246 SD 232, range 720-                                                                     | Whole PT group mean 6.3 days SD 12, range 0-51, Control group                                                                 | Whole PT group mean 19 SD 0.3, range 19-20, Control                                     | PT group 1983 | 0/42     | Spirometry using a pneumotachograph                  | Results as percentage predicted based on height <sup>E47</sup>                             |

|                                              |                                                                    |                                                                                                                                                                            |                                                                                                                                                        |                                                                 |                                                                                                                                                                          |           |                              |                                                                                              |                                                    |
|----------------------------------------------|--------------------------------------------------------------------|----------------------------------------------------------------------------------------------------------------------------------------------------------------------------|--------------------------------------------------------------------------------------------------------------------------------------------------------|-----------------------------------------------------------------|--------------------------------------------------------------------------------------------------------------------------------------------------------------------------|-----------|------------------------------|----------------------------------------------------------------------------------------------|----------------------------------------------------|
|                                              |                                                                    | group term range 37-42                                                                                                                                                     | 1750, Control group X                                                                                                                                  | X                                                               | group mean 20.8 SD 1.2, range 18-22                                                                                                                                      |           |                              |                                                                                              |                                                    |
| <b>Nikolajev<sup>E90</sup><br/>Finland</b>   | Not given for 45 PT children                                       | 45 children ≤36 weeks                                                                                                                                                      | Not given for 45 PT children                                                                                                                           | Not given for 45 PT children                                    | All children median 10.3 range 7.3-15.3                                                                                                                                  | 1979-1986 | Not given for 45 PT children | 2200 computerized pulmonary function laboratory from Sensor Medics (Yorba Linda, CA)         | Results as percentage predicted <sup>E48</sup>     |
| <b>Bertrand<sup>E91</sup><br/>Canada</b>     | PT group (9M,13F)<br>Control group (12M,10F) no info on 9 controls | Syndrome group mean 32.5 SD 3.6, No disease group mean 33.4 SD 2.5, Syndrome group siblings mean 39.2 SD 1.5, No disease siblings mean 38.7 SD 1.5 Controls no prematurity | Syndrome group mean 1900 SD 615, No disease group mean 2010 SD 480, Syndrome group siblings mean 3140 SD 400, No disease siblings mean 3040 Controls X | X                                                               | Syndrome group mean 10.1 SD 1.1, No disease group mean 8.0 SD 1.0, Syndrome group siblings mean 11.4 SD 2.1, No disease siblings mean 9.9 SD 2.1 Controls no prematurity | X         | X                            | SRL Medical                                                                                  | Expressed as percentage predicted <sup>E35</sup>   |
| <b>Borkenstein<sup>E92</sup><br/>Austria</b> | PT group with LF results (3M, 3F)                                  | PT group with LF results range 30-36 mean 33.3                                                                                                                             | PT group with LF results range 1200-2600 mean 1806.7                                                                                                   | PT group with LF results 6/6 IPPV hours range 34-624 mean 189.3 | PT group with LF results range 3.5-5.1 mean 4.2                                                                                                                          | X         | X                            | Pneumotachograph and whole body plethysmograph (Pulmostar, Fenyes & Gut, Basle, Switzerland) | Expressed as a percentage predicted <sup>E35</sup> |

|                                       |                                               |                                                                                               |                                                                                                      |                                                                                              |                                                                                 |           |   |                                                                  |                                                  |
|---------------------------------------|-----------------------------------------------|-----------------------------------------------------------------------------------------------|------------------------------------------------------------------------------------------------------|----------------------------------------------------------------------------------------------|---------------------------------------------------------------------------------|-----------|---|------------------------------------------------------------------|--------------------------------------------------|
| <b>Abreu<sup>E26</sup><br/>Brazil</b> | PT group (17M, 9F)<br>Control group (9M, 11F) | PT group mean 35 SD 2.3 range 28-36, BPD group mean 32 SD 1.5 range 30-34, Control group term | PT group mean 1765 SD 621 range 850-2800, BPD group mean 1037 SD 229 range 830-1670, Control group X | PT group mean 1 SD 2 range 0-6, BPD group 13/13 mean 11 SD 6.6 range 3-26<br>Control group X | PT group mean 8.3 SD 1.11, BPD group mean 8.5 SD 0.97, Control mean 8.2 SD 1.14 | 1993-1996 | X | SpiroCard PC Card Flux spirometer (QRS Diagnostic-Plymouth, USA) | Expressed as percentage predicted <sup>E35</sup> |
|---------------------------------------|-----------------------------------------------|-----------------------------------------------------------------------------------------------|------------------------------------------------------------------------------------------------------|----------------------------------------------------------------------------------------------|---------------------------------------------------------------------------------|-----------|---|------------------------------------------------------------------|--------------------------------------------------|

**Table E4c:- Lung function outcomes of the included articles preterm group (including studies with BPD) compared to term control group**

| STUDY                        | FEV <sub>1</sub> PREDICTED                                      | FVC PREDICTED                                                     | FEF <sub>25-75</sub> PREDICTED                                   | RATIOS                                                                                  | TLC                                     | RV | DLCO |
|------------------------------|-----------------------------------------------------------------|-------------------------------------------------------------------|------------------------------------------------------------------|-----------------------------------------------------------------------------------------|-----------------------------------------|----|------|
| <b>Konefal<sup>E73</sup></b> | PT group mean 95.07, SD 17.54<br>Control mean 96.2, SD 20.2     | Results given for each group separately                           | X                                                                | X                                                                                       | Results given for each group separately | X  | X    |
| <b>Anand<sup>E74</sup></b>   | VLBW group mean 94.9 SD 13.8<br>Control group mean 96.5 SD 10.8 | VLBW group mean 109.5 SD 14.6<br>Control group mean 106.0 SD 12.2 | VLBW group mean 88.1 SD 25.6<br>Control group mean 100.5 SD 20.0 | FEV <sub>1</sub> /FVC<br>VLBW group mean 87.0 SD 9.04<br>Control group mean 90.8 SD 6.4 | X                                       | X  | X    |
| <b>Fawke<sup>E1</sup></b>    | EP mean 83 SD 14,<br>Controls mean 100 SD 12                    | EP mean 93 SD 14,<br>Controls mean 102 SD 12                      | EP mean 61 SD 23,<br>Controls mean 90 SD 23                      | FEV <sub>1</sub> /FVC<br>EP mean 89 SD 11,<br>Controls mean 98 SD 8                     | X                                       | X  | X    |
| <b>Arad<sup>E2</sup></b>     | PT group mean 82.6 SD 10.8                                      | X                                                                 | X                                                                | X                                                                                       | X                                       | X  | X    |

|                                     |                                                                                             |                                                                    |                                                                                             |                                                                                         |                                                              |                                                               |                                                                |
|-------------------------------------|---------------------------------------------------------------------------------------------|--------------------------------------------------------------------|---------------------------------------------------------------------------------------------|-----------------------------------------------------------------------------------------|--------------------------------------------------------------|---------------------------------------------------------------|----------------------------------------------------------------|
| <b>De Kleine</b> <sup>E3</sup>      | BPD and Non BPD and non ventilated mean 87.83<br>SD 17.33,<br>Control mean 95<br>SD 12      | X                                                                  | X                                                                                           | X                                                                                       | X                                                            | X                                                             | X                                                              |
| <b>Doyle</b> <sup>E4</sup>          | 2 LBW groups mean 94.82<br>SD 14.42<br>NBW mean 104.6<br>SD 13.2                            | Given separately for LBW groups<br>NBW mean 104.8<br>SD 12.0       | Given separately for LBW groups<br>NBW mean 99.1<br>SD 23.4                                 | FEV <sub>1</sub> /FVC<br>Given separately for LBW groups<br>NBW mean 87.0<br>SD 7.0     | Given separately for LBW groups<br>NBW mean 102.5<br>SD 13.9 | Given separately for LBW groups<br>NBW mean 117.4<br>SD 30.8  | X                                                              |
| <b>Burns</b> <sup>E75</sup>         | ELBW group mean 88.98 SD 13.47,<br>Control mean 97.73,<br>SD 10.89                          | ELBW group mean 96.96 SD 12.48,<br>Control mean 98.88,<br>SD 11.02 | X                                                                                           | FEV <sub>1</sub> /FVC<br>ELBW group mean 93.26 SD 7.84,<br>Control mean 101.55, SD 6.05 | X                                                            | X                                                             | X                                                              |
| <b>Doyle</b> <sup>E6</sup>          | ELBW group mean 84.9 SD 12.7,<br>Control group 97.9<br>SD 11.8                              | ELBW group mean 86.1 SD 14.1,<br>Control group 95.2<br>SD 12.6     | ELBW group mean 65.2 SD 21.7,<br>Control group 85.6<br>SD 20.2                              | FEV <sub>1</sub> /FVC<br>ELBW group mean 88.4 SD 9.2,<br>Control group 91.4<br>SD 6.6   | ELBW group mean 96.0 SD 13.9,<br>Control group 98.5 SD 11.7  | ELBW group mean 129.9 SD 43.1,<br>Control group 112.2 SD 34.2 | X                                                              |
| <b>Evenson</b> <sup>E76</sup>       | VLBW group mean 85.2 SE 1.8, Control group mean 98.1 SE 1.4                                 | X                                                                  | X                                                                                           | X                                                                                       | VLBW group mean 99.2 SE 1.7, Control group mean 100.6 SE 1.3 | Given as litres                                               | X                                                              |
| <b>Galdes-Sebaldt</b> <sup>E7</sup> | <1500g no HMD group mean 82 SEM 2,<br><1500g HMD group mean 83 SEM 2,<br>control group mean | X                                                                  | <1500g no HMD group mean 82 SEM 4,<br><1500g HMD group mean 90 SEM 7,<br>control group mean | X                                                                                       | X                                                            | X                                                             | <1500g no HMD group mean 87 SEM 3,<br><1500g HMD group mean 97 |

|                                 | 92 SEM 1                                                         |                                                                 | 104 SEM 3                                                       |                                                                          |                                                                 |                                       | SEM 4, control group mean 99 SEM 3 |
|---------------------------------|------------------------------------------------------------------|-----------------------------------------------------------------|-----------------------------------------------------------------|--------------------------------------------------------------------------|-----------------------------------------------------------------|---------------------------------------|------------------------------------|
| <b>Gappa</b> <sup>E77</sup>     | Premature group combined mean 101.93 SD 14.22                    | Results given for 2 groups separately                           | X                                                               | X                                                                        | X                                                               | X                                     | X                                  |
| <b>Grischkan</b> <sup>E78</sup> | 2 groups combined mean 90.6 SD 15.76                             | X                                                               | X                                                               | Results given separately for 2 groups                                    | X                                                               | X                                     | X                                  |
| <b>Gross</b> <sup>E9</sup>      | PT group mean 91.28 SD 19.01, Control group mean 97 SD 12        | Results given separately for 2 groups                           | Results given separately for 2 groups                           | X                                                                        | Results given separately for 2 groups                           | Results given separately for 2 groups | X                                  |
| <b>Kennedy</b> <sup>E14</sup>   | VLBW group mean 91.0 SD 14.9<br>Control group mean 102.1 SD 10.2 | VLBW group mean 99.1 SD 10.6<br>Control group mean 104.2 SD 9.6 | VLBW group mean 70.1 SD 25.7<br>Control group mean 90.7 SD 21.8 | X                                                                        | VLBW group mean 99.7 SD 12.8<br>Control group mean 98.3 SD 10.8 | X                                     | X                                  |
| <b>Kilbride</b> <sup>E15</sup>  | ELBW mean 85 SD 14<br>Control group mean 91 SD 9                 | ELBW mean 93 SD 14<br>Control group mean 96 SD 11               | ELBW mean 84 SD 25<br>Control group mean 100 SD 17              | FEV <sub>1</sub> /FVC<br>ELBW mean 86 SD 8<br>Control group mean 89 SD 5 | X                                                               | X                                     | X                                  |
| <b>Baraldi</b> <sup>E17</sup>   | VLBW mean 94.2 SD 8.9                                            | VLBW mean 92.8 SD 8.1                                           | VLBW mean 103.4 SD 23.5                                         | X                                                                        | X                                                               | X                                     | X                                  |
| <b>Wagner</b> <sup>E79</sup>    | PT mean 121.2 SD 37.5                                            | Results given individually for each patient                     | Results given individually for each patient                     | X                                                                        | X                                                               | X                                     | X                                  |
| <b>Mai</b> <sup>E80</sup>       | VLBW group mean 92 SD 12, Controls mean 95 SD 10                 | X                                                               | MMEF VLBW group mean 85 SD 22, Controls mean 88 SD 20           | X                                                                        | X                                                               | X                                     | X                                  |
| <b>MacLusky</b> <sup>E81</sup>  | PT group mean 91.2                                               | PT group mean 86.9                                              | PT group mean 87 SD                                             | X                                                                        | PT group mean                                                   | X                                     | X                                  |

|                                  |                                                            |                                                            |                                                     |                                                                                |                                                         |                                                        |                                                        |
|----------------------------------|------------------------------------------------------------|------------------------------------------------------------|-----------------------------------------------------|--------------------------------------------------------------------------------|---------------------------------------------------------|--------------------------------------------------------|--------------------------------------------------------|
|                                  | SD 12.7                                                    | SD 10.4                                                    | 24                                                  |                                                                                | 94 SD 13.9                                              |                                                        |                                                        |
| <b>Mieskonen</b> <sup>E20</sup>  | PT group mean 84.1 SD 14.3, Control group 101.7 SD 8.4     | PT group mean 90.2 SD 11.2 Control group 104.5 SD 10.9     | X                                                   | X                                                                              | X                                                       | X                                                      | PT group mean 86.7 SD 12.8, Control group 99.5 SD 11.6 |
| <b>Odberg</b> <sup>E82</sup>     | LBW group mean 106.8 SD 13.5, NBW group mean 110.2 SD 14.2 | LBW group mean 115.4 SD 13.5, NBW group mean 115.7 SD 14.8 | X                                                   | FEV <sub>1</sub> /FVC<br>LBW group mean 82 SD 10, NBW group mean 85 SD 10      | X                                                       | X                                                      | X                                                      |
| <b>Rivlin</b> <sup>E83</sup>     | PT mean 81.3 SD 8.1                                        | Results given individually for each patient                | Results given individually for each patient         | X                                                                              | X                                                       | X                                                      | X                                                      |
| <b>Wiebicke</b> <sup>E84</sup>   | PT group mean 86.3 SD 8.9                                  | X                                                          | X                                                   | Results given for each patient individually                                    | Results given for each patient individually             | Results given for each patient individually            | X                                                      |
| <b>Von Mutius</b> <sup>E85</sup> | PT group mean 98.7 SD 10.46, Controls 100.4 SD 14.12       | Results given for PT in 2 groups                           | X                                                   | X                                                                              | X                                                       | X                                                      | X                                                      |
| <b>Palta</b> <sup>E22</sup>      | VLBW group mean 86 SD 14<br>Control group mean 97 SD 12    | VLBW group mean 85 SD 26<br>Control group mean 99 SD 27    | X                                                   | X                                                                              | X                                                       | X                                                      | X                                                      |
| <b>Smith</b> <sup>E86</sup>      | PT group mean 85 SD 12.4, control mean 95 SD 10.2          | PT group mean 96.3 SD 13.6, control mean 102.1 SD 10.1     | PT group mean 82.1 SD 8.3, control mean 86.4 SD 3.7 | FEV <sub>1</sub> /FVC<br>PT group mean 71.8 SD 22.9, control mean 91.4 SD 15.7 | PT group mean 108.7 SD 10.7, control mean 102.8 SD 10.1 | PT group mean 140.8 SD 44.4, control mean 98.5 SD 39.8 | X                                                      |
| <b>Telford</b> <sup>E87</sup>    | PT group mean 85.5 SD 12.54                                | Results given for PT in 2 groups                           | X                                                   | X                                                                              | X                                                       | X                                                      | X                                                      |
| <b>Siltanen</b> <sup>E88</sup>   | PT group mean 92 SD 13.1<br>Control group mean             | PT group mean 96 SD 12.6<br>Control group mean             | PT group mean 87 SD 24.0<br>Control group mean      | FEV <sub>1</sub> /FVC<br>PT group mean 84 SD 7.8                               | X                                                       | X                                                      | X                                                      |



|                                   |                                                                |                                                                |                                             |                                                                                      |                                                               |                                                               |                                                              |
|-----------------------------------|----------------------------------------------------------------|----------------------------------------------------------------|---------------------------------------------|--------------------------------------------------------------------------------------|---------------------------------------------------------------|---------------------------------------------------------------|--------------------------------------------------------------|
|                                   | 104 SD 8.0                                                     | 102 SD 9.6                                                     | 114 SD 21.2                                 | Control group mean 88 SD 5.4                                                         |                                                               |                                                               |                                                              |
| <b>Gross</b> <sup>E89</sup>       | PT group mean 79.96 SD 18.3                                    | Results given individually for the 3 groups                    | Results given individually for the 3 groups | X                                                                                    | Results given individually for the 3 groups                   | Results given individually for the 3 groups                   | X                                                            |
| <b>Vrijlandt</b> <sup>E24</sup>   | PT group mean 95.4 SD 15.9<br>Control group mean 109.6 SD 13.4 | PT group mean 97.7 SD 13.7<br>Control group mean 106.0 SD 10.8 | X                                           | FEV <sub>1</sub> /FVC<br>PT group mean 82.2 SD 8.2<br>Control group mean 87.4 SD 6.6 | PT group mean 100.1 SD 9.9<br>Control group mean 103.3 SD 9.7 | PT group mean 99.4 SD 28.3<br>Control group mean 90.3 SD 25.3 | PT group mean 88.4 SD 13.7<br>Control group mean 96.3 SD 9.9 |
| <b>Nikolajev</b> <sup>E90</sup>   | PT group mean 90.2 SD 9.88                                     | X                                                              | Results given separately for 2 PT groups    | Results given separately for 2 PT groups                                             | X                                                             | X                                                             | X                                                            |
| <b>Bertrand</b> <sup>E91</sup>    | PT group mean 76 SD 13.4, Term group mean 84.6 SD 10.2,        | X                                                              | X                                           | X                                                                                    | X                                                             | X                                                             | X                                                            |
| <b>Borkenstein</b> <sup>E92</sup> | PT children mean 65.4 SD 8.3                                   | Results given for the 6 children individually                  | X                                           | Results given for the 6 children individually                                        | Results given for the 6 children individually                 | Results given for the 6 children individually                 | X                                                            |
| <b>Abreu</b> <sup>E26</sup>       | PT group mean 99.43 SD 12.61, Control group mean 102 SD 15     | X                                                              | X                                           | X                                                                                    | X                                                             | X                                                             | X                                                            |

**Key to abbreviations in all tables**

|             |                            |               |                                               |
|-------------|----------------------------|---------------|-----------------------------------------------|
| <b>BW</b>   | Birth-weight               | <b>HMD</b>    | Hyaline membrane disease                      |
| <b>LBW</b>  | Low birth-weight           | <b>RDS</b>    | Respiratory distress syndrome                 |
| <b>VLBW</b> | Very low birth-weight      | <b>Dex</b>    | Dexamethasone                                 |
| <b>ELBW</b> | Extremely low birth-weight | <b>IPPV</b>   | Intermittent positive pressure<br>ventilation |
| <b>NBW</b>  | Normal birth-weight        | <b>IPPB</b>   | Intermittent Positive Pressure<br>Breathing   |
| <b>PT</b>   | Preterm                    | <b>HFV</b>    | High frequency ventilation                    |
| <b>EP</b>   | Extremely preterm          | <b>n-CPAP</b> | Nasal continuous positive airway<br>pressure  |
| <b>BPD</b>  | Bronchopulmonary dysplasia | <b>CNEP</b>   | Continuous negative                           |

extrathoracic pressure

|             |                              |                            |                                                          |
|-------------|------------------------------|----------------------------|----------------------------------------------------------|
| <b>M</b>    | Male                         | <b>ISAAC</b>               | International Study of Asthma and Allergies in Childhood |
| <b>F</b>    | Female                       | <b>M/S</b>                 | Moderate/severe                                          |
| <b>X</b>    | Missing data                 | <b>FEV<sub>1</sub></b>     | Forced expiratory volume in 1 second                     |
| <b>SD</b>   | Standard deviation           | <b>FVC</b>                 | Forced vital capacity                                    |
| <b>SEM</b>  | Standard error mean          | <b>FEF<sub>25-75</sub></b> | Mid-expiratory flow at 75-25% of FVC                     |
| <b>IQR</b>  | Interquartile range          | <b>TLC</b>                 | Total lung capacity                                      |
| <b>GA</b>   | Gestational age              | <b>RV</b>                  | Residual volume                                          |
| <b>RCT</b>  | Randomised control trial     | <b>DLCO</b>                | Diffusing capacity of lung for carbon monoxide           |
| <b>NICU</b> | Neonatal intensive care unit | <b>CT</b>                  | Computed tomography                                      |

|            |                                 |             |                                     |
|------------|---------------------------------|-------------|-------------------------------------|
|            |                                 | <b>HRCT</b> | High resolution computed tomography |
| <b>LF</b>  | Lung function                   | <b>IUGR</b> | Intrauterine Growth Retardation     |
| <b>AGA</b> | Appropriate for gestational age | <b>SGA</b>  | Small for gestational age           |

## Appendix 1

### **The effect of premature birth compared to term birth on later lung function - a systematic review of the literature.**

#### Review Question

Is lung function in later life poorer in preterm babies compared to babies born at term?

#### Search strategy

A search strategy was developed for electronic databases using the keywords and MeSH headings below. The search strategy was tested for citations on the OVID Medline database 1950-2010. The Observational Studies search filter used by SIGN (Scottish Intercollegiate Guidelines Network) <http://www.sign.ac.uk/methodology/filters.html#obs> was adapted to retrieve types of study designs included in the review.

The search strategy will be modified to search rest of the bibliographic databases. In addition, a range of 'snowballing' techniques will be used to increase the sensitivity of the search, including reference list follow up, contact with subject experts and relevant websites/organisations, and table of content scanning for the top three most frequently cited journals.

#### Keywords/ MeSH headings

Bronchspirometry/  
Bronchspirometries  
Chronic respiratory questionnaire  
FEF 25 75 Percent  
Forced Expiratory Volume/  
FEVT  
Flow Rate, Maximal Expiratory/  
Forced Expiratory Flow Rates/  
Forced Vital Capacity  
ISAAC questionnaire  
Lung function test  
Lung Volume Measurements/  
MEFR  
Maximal Midexpiratory Flow Rate/

Maximal Expiratory Flow Rate/  
MMFR

Pulmonary Function Test  
Respiratory Function Tests/  
SGRQ  
Spirometry/  
Spirometries  
St George's respiratory questionnaire  
Timed Vital Capacity  
Vital Capacity/  
Volumes, Forced  
Volume, Forced Expiratory/  
Birth Weight/  
Birth Weight Low/  
Fetal Growth Retardation/  
Infant, Low Birth Weight/  
Infant, Very Low Birth Weight/  
Infant, Extremely Low Birth Weight/  
Infant, Premature/  
IUGR  
Intrauterine growth restriction  
Low birth weight  
Obstetric Labor, Premature/  
Premature infant  
Preterm labor  
Premature labor  
Premature birth  
Preterm birth

Asthma/  
bronchial asthma  
Bronchopulmonary Dysplasia/  
Chronic lung disease of infancy/  
Hyaline Membrane Disease/  
Chronic lung disease of prematurity  
Respiratory Distress Syndrome, Newborn/  
Pulmonary Disease, Chronic Obstructive/

#### Ovid MEDLINE - Search Strategy

1. exp Bronchospirrometry/
2. exp Vital Capacity/

3. exp Forced Expiratory Volume/
4. Respiratory Function Tests/
5. exp Forced Expiratory Flow Rates/
6. exp Maximal Expiratory Flow Rate/
7. exp Maximal Midexpiratory Flow Rate/
8. Spirometry/
9. Lung Volume Measurements/
10. Bronchspirometries.mp.
11. Forced Vital Capacit\*.mp.
12. Timed Vital Capacit\*.mp.
13. (MEFR or MMFR or FEVt or SGRQ).mp.
14. St George's respiratory questionnaire.mp.
15. Chronic Respiratory Questionnaire.mp.
16. ISAAC questionnaire.mp.
17. Flow Rate, Maximal Expiratory/
18. Volume, Forced Expiratory/
19. Volumes, Forced/
20. Forced volume.mp.
21. ((Maximal or flow rate) adj2 expirator\*).mp.
22. FEF 25 75 Percent.mp.
23. ((lung\* or respiratory or pulmonary) adj2 (function\* or expirator\* capacit\*)).mp.
24. spirometries.mp.
25. or/1-24
26. ((lung\*1 or respiratory or pulmonary) adj2 (disease\*1 or disorder\*1)).mp.
27. exp Asthma/
28. exp Respiratory Distress Syndrome, Newborn/
29. Bronchial asthma.mp.
30. Chronic lung disease of prematurity.mp.
31. Chronic lung disease of infancy.mp.
32. Hyaline Membrane Disease/
33. Bronchopulmonary Dysplasia/
34. Pulmonary Disease, Chronic Obstructive/
35. or/26-34
36. exp Infant, Low Birth Weight/
37. exp Infant, Very Low Birth Weight/
38. exp Infant, Extremely Low Birth Weight/
39. exp Infant, Premature/
40. Obstetric Labor, Premature/

41. exp Premature Birth/
42. Fetal Growth Retardation/
43. Birth Weight/
44. Low Birth Weight.mp.
45. ((Preterm\* or Premature\*) adj2 (labo#r\* or birth\* or born or infant or baby or babies or child or children or girl\*1 or boy\*1)).mp.
46. Prematurity.mp.
47. IUGR.mp.
48. intrauterine growth restriction.mp.
49. or/36-48
50. 25 or 35
51. 49 and 50
52. Epidemiologic Studies/
53. exp case control studies/
54. exp cohort studies/
55. Case control.tw.
56. (cohort adj (study or studies)).tw.
57. Cohort analy\*.tw.
58. (Follow up adj (study or studies)).tw.
59. (observational adj (study or studies)).tw.
60. Longitudinal.tw.
61. Retrospective.tw.
62. Cross sectional.tw.
63. Cross-sectional studies/
64. case-control studies/ or longitudinal/ or follow-up studies/ or prospective studies/
65. or/52-64
66. 51 and 65

The following table is an explanation of the symbols used in the search strategy above.

- / after an index term (MeSH heading) indicates that all subheadings were selected.
- \* before an index term indicates that that term was focused - i.e. limited to records where the term was a major MeSH/Emtree term.
- "exp" before an index term indicates that the term was exploded.
- .tw. indicates a search for a term in title/abstract
- .mp. indicates a free text search for a term



- # retrieves records that contain the search term with substituted character(s) in the specified location.
- \* at the end of a term indicates that this term has been truncated.
- \*n The limited truncation symbol, \$n, Retrieves records that contain the search term and all possible suffix variations of a root word with the maximum number of characters that may follow the root word or phrase, specified by n.
- ? in the middle of a term indicates the use of a wildcard.
- adj indicates a search for two terms where they appear adjacent to one another

#### Databases and information sources

|                                                                    |
|--------------------------------------------------------------------|
| Bibliographic databases                                            |
| CINAHL 1982-                                                       |
| Embase 1980-                                                       |
| <a href="#">HMIC Health Management Information Consortium</a> 1979 |
| Medline 1950-                                                      |
| Medline in Process                                                 |
| Scopus                                                             |
| OpenSIGLE                                                          |
| Web of Knowledge                                                   |
| Science Citation Index Expanded 1981-                              |
| Social Science Citation Index 1981-                                |
| ISI Proceedings 1990-                                              |

|                                                                                                                                            |
|--------------------------------------------------------------------------------------------------------------------------------------------|
| Websites                                                                                                                                   |
| Action Medical Research <a href="http://www.action.org.uk/">http://www.action.org.uk/</a>                                                  |
| SPARKS <a href="https://www.sparks.org.uk/NetCommunity/SSLPage.aspx?pid=19">https://www.sparks.org.uk/NetCommunity/SSLPage.aspx?pid=19</a> |
| Wellcome Trust <a href="http://www.wellcome.ac.uk/">http://www.wellcome.ac.uk/</a>                                                         |
|                                                                                                                                            |

## Appendix 2

### The effect of premature birth compared to term birth on later lung function - a systematic review of the literature

| Source                                                                   | Y/N/not clear/not reported/comment |
|--------------------------------------------------------------------------|------------------------------------|
| Study ID number                                                          |                                    |
| Report ID (surname of first author and year study undertaken)            |                                    |
| Title                                                                    |                                    |
| Authors names                                                            |                                    |
| Journal                                                                  |                                    |
| Language published in                                                    |                                    |
| Reviewed by                                                              |                                    |
| Other comments                                                           |                                    |
|                                                                          |                                    |
| Eligibility                                                              |                                    |
| Confirm eligibility for review                                           |                                    |
| Gestation $\leq$ 32 weeks gestation                                      |                                    |
| Gestation 33-37 weeks gestation                                          |                                    |
| Other gestation please state                                             |                                    |
| Age at time of LF testing $<$ 5 years                                    |                                    |
| Age at time of LF testing $\geq$ 5 years                                 |                                    |
| If age less than 5 years method of LF testing                            |                                    |
| LF variables collected FEV0.5                                            |                                    |
| LF variables collected FEV1                                              |                                    |
| LF variables collected FVC                                               |                                    |
| LF variables collected FEF25-75/MEF                                      |                                    |
| LF variables collected Ratios                                            |                                    |
| LF variables collected TLC                                               |                                    |
| LF variables collected RV                                                |                                    |
| LF variables collected DLCO                                              |                                    |
| LF values reported compared to predicted values or term group comparison |                                    |
| BPD/CLD group                                                            |                                    |
| Reason for exclusion                                                     |                                    |
| Need to write to authors                                                 |                                    |
| Other comments                                                           |                                    |
|                                                                          |                                    |
| Methods                                                                  |                                    |
| Study design                                                             |                                    |
| Age of study groups                                                      |                                    |

|                                       |  |
|---------------------------------------|--|
| Other comments                        |  |
|                                       |  |
| Participants                          |  |
| Total number                          |  |
| Total number in CLD/BPD group         |  |
| Total number in prem group            |  |
| Total number in control group         |  |
| Total number excluded                 |  |
| Reason why excluded                   |  |
| Setting                               |  |
| Birthweight                           |  |
| Social status                         |  |
| Rate of ventilation                   |  |
| Personal smoking by the prem subjects |  |
| Age at time of LF testing             |  |
| Sex                                   |  |
| Weeks gestation                       |  |
| Maternal smoking                      |  |
| Surfactant given and details          |  |
| Maternal steroids given and details   |  |
| Country                               |  |
| Co-morbidity                          |  |
| Ethnicity                             |  |
| Year of birth of participants         |  |
| CLD/BPD and how defined               |  |
| Neonatal data information             |  |
| Date of study                         |  |
| Other comments                        |  |
|                                       |  |
| Interventions                         |  |
| Did study consider intervention       |  |
| Specific intervention                 |  |
| Intervention details                  |  |
| Is baseline data adequate             |  |
| Other comments                        |  |
|                                       |  |
| Outcomes                              |  |
|                                       |  |

| FEV0.5                | Prem | BPD/CLD/ | control |
|-----------------------|------|----------|---------|
| Total number in group |      |          |         |
| Mean                  |      |          |         |
| SD                    |      |          |         |
| Median                |      |          |         |

|                           |  |  |  |
|---------------------------|--|--|--|
| Significance              |  |  |  |
| Method of measuring LF    |  |  |  |
| Method of standardisation |  |  |  |
| Raw values                |  |  |  |

|                           |      |          |         |
|---------------------------|------|----------|---------|
| FEV1                      | Prem | BPD/CLD/ | control |
| Total number in group     |      |          |         |
| Mean                      |      |          |         |
| SD                        |      |          |         |
| Median                    |      |          |         |
| Significance              |      |          |         |
| Method of measuring LF    |      |          |         |
| Method of standardisation |      |          |         |
| Raw values                |      |          |         |

|                           |      |          |         |
|---------------------------|------|----------|---------|
| FVC                       | Prem | BPD/CLD/ | control |
| Total number in group     |      |          |         |
| Mean                      |      |          |         |
| SD                        |      |          |         |
| Median                    |      |          |         |
| Significance              |      |          |         |
| Method of measuring LF    |      |          |         |
| Method of standardisation |      |          |         |
| Raw values                |      |          |         |

|                        |      |          |         |
|------------------------|------|----------|---------|
| FEF25-75/MEF           | Prem | BPD/CLD/ | control |
| Total number in group  |      |          |         |
| Mean                   |      |          |         |
| SD                     |      |          |         |
| Median                 |      |          |         |
| Significance           |      |          |         |
| Method of measuring LF |      |          |         |
| Method of              |      |          |         |

|                 |  |  |  |
|-----------------|--|--|--|
| standardisation |  |  |  |
| Raw values      |  |  |  |

|                           |      |          |         |
|---------------------------|------|----------|---------|
| ratios                    | Prem | BPD/CLD/ | control |
| Total number in group     |      |          |         |
| Mean                      |      |          |         |
| SD                        |      |          |         |
| Median                    |      |          |         |
| Significance              |      |          |         |
| Method of measuring LF    |      |          |         |
| Method of standardisation |      |          |         |
| Raw values                |      |          |         |

|                           |      |          |         |
|---------------------------|------|----------|---------|
| TLC                       | Prem | BPD/CLD/ | control |
| Total number in group     |      |          |         |
| Mean                      |      |          |         |
| SD                        |      |          |         |
| Median                    |      |          |         |
| Significance              |      |          |         |
| Method of measuring LF    |      |          |         |
| Method of standardisation |      |          |         |
| Raw values                |      |          |         |

|                           |      |          |         |
|---------------------------|------|----------|---------|
| RV                        | Prem | BPD/CLD/ | control |
| Total number in group     |      |          |         |
| Mean                      |      |          |         |
| SD                        |      |          |         |
| Median                    |      |          |         |
| Significance              |      |          |         |
| Method of measuring LF    |      |          |         |
| Method of standardisation |      |          |         |
| Raw values                |      |          |         |

|                 |      |          |         |
|-----------------|------|----------|---------|
| DLCO            | Prem | BPD/CLD/ | control |
| Total number in |      |          |         |

|                           |  |  |  |
|---------------------------|--|--|--|
| group                     |  |  |  |
| Mean                      |  |  |  |
| SD                        |  |  |  |
| Median                    |  |  |  |
| Significance              |  |  |  |
| Method of measuring LF    |  |  |  |
| Method of standardisation |  |  |  |
| Raw values                |  |  |  |

|                                      |  |
|--------------------------------------|--|
| Miscellaneous                        |  |
| Funding source                       |  |
| Key conclusions                      |  |
| Miscellaneous comments from authors  |  |
| References to other relevant studies |  |
| Other comments                       |  |
|                                      |  |
|                                      |  |

### Appendix 3

#### Assessment of study quality

| Quality                                                    | Scores awarded |  |
|------------------------------------------------------------|----------------|--|
| Selection                                                  |                |  |
| 1) Representativeness of the exposed cohort                |                |  |
| a) truly representative of the average in the community    | 4              |  |
| b) Somewhat representative of the average in the community | 3              |  |
| c) Selected group of users eg nurses, volunteers           | 2              |  |
| d) no description of the derivation of the cohort          | 1              |  |
| 2) Selection of the non exposed cohort                     |                |  |
| a) Drawn from the same community                           | 3              |  |

|                                                                             |   |  |
|-----------------------------------------------------------------------------|---|--|
| b) Drawn from a different source                                            | 2 |  |
| c) no description of the derivation of the non exposed cohort               | 1 |  |
| 3) Ascertainment of exposure (weeks gestation)                              |   |  |
| a) secure record (scan +/- LMP)                                             | 3 |  |
| b) Written self report ( medical assessment)                                | 2 |  |
| c) no description                                                           | 1 |  |
| 4) Demonstration that outcome of interest was not present at start of study |   |  |
| a) yes                                                                      | 2 |  |
| b) no                                                                       | 1 |  |
| Outcome                                                                     |   |  |
| 1) Assessment of outcome                                                    |   |  |
| a) independent blind assessment                                             | 4 |  |
| b) record linkage                                                           | 3 |  |
| c) self report                                                              | 2 |  |
| d) no description                                                           | 1 |  |
| 2) Adequacy of follow up of cohorts                                         |   |  |
| a) complete follow up all subject accounted for                             | 4 |  |
| b) subjects lost to follow up unlikely to introduce bias                    | 3 |  |
| c) follow up rate low and no description of those lost                      | 2 |  |
| d) no statement                                                             | 1 |  |

**Figure E1. Preterm group (no BPD) where the results were reported as percentages of predicted values.**

**Figure E2. BPD (supplemental oxygen dependency at 28 days of life) results reported as percentages of predicted values.**

**Figure E3. BPD (supplemental oxygen dependency 36 weeks PMA) where results were reported as percentages of predicted values.**

**Figure E4. Preterm group (including groups with BPD) where results were reported as percentages of predicted values.**



## REFERENCES

- E1. Fawke J, Lum S, Kirkby J, et al. Lung function and respiratory symptoms at 11 years in children born extremely preterm. The EPICure Study. *Am J Respir Crit Care Med* 2010; 182: 237–245.
- E2. Arad I, Bar-Yishay E, Eyal F, et al. Lung function in infancy and childhood following neonatal intensive care. *Pediatric Pulmonology* 1987;3:29–33.
- E3. De Kleine MJK, Roos CM, Voorn WJ, et al. Lung function 8–18 years after intermittent positive pressure ventilation for hyaline membrane disease. *Thorax* 1990;45:941–946
- E4. Doyle LW, Cheung MMH, Ford GW, et al. Birth weight <1501g and respiratory health at age 14. *Arch Dis Child* 2001;84:40–44.
- E5. Kulasekaran K, Gray PH, Masters B. Chronic lung disease of prematurity and respiratory outcome at eight years of age. *Journal of Paediatrics and Child Health* 2007;43:44–48.
- E6. Doyle LW and the Victorian Infant Collaborative Study Group. Respiratory function at age 8-9 years in extremely low birthweight/very preterm children born in Victoria in 1991-1992. *Pediatric Pulmonology* 2006;41:570–576.
- E7. Galdes-Sebaldt M, Sheller JR, Groggaard J, et al. Prematurity is associated with abnormal airway function in childhood. *Pediatric Pulmonology* 1989;7:259–264.
- E8. Giacoia GP, Venkataraman PS, West-Wilson KI, et al. Follow-up of school-age children with bronchopulmonary dysplasia. *The Journal of Paediatrics* 1997;130(3):400–408.

- E9. Gross SJ, Iannuzzi DM, Kveselis DA, et al. Effect of preterm birth on pulmonary function at school age: A prospective controlled study. *The Journal of Pediatrics* 1998;133(2):188–192.
- E10. Halvorsen T, Skadberg BT, Eide GE, et al. Characteristics of asthma and airway hyper-responsiveness after premature birth. *Pediatr Allergy Immunol* 2005;16:487–494.
- E11. Smith LJ, van Asperen PP, McKay KO, et al. Post-natal corticosteroids are associated with reduced expiratory flows in children born very preterm. *Journal of Pediatrics and Child Health* 2011;47:448–454.
- E12. Jacob SV, Coates AL, Lands LC, et al. Long-term pulmonary sequelae of severe bronchopulmonary dysplasia. *The Journal of Pediatrics* 1998;133(2):193–200.
- E13. Jacob SV, Lands LC, Coates AL, et al. Exercise ability in survivors of severe bronchopulmonary dysplasia. *Am J Respir Crit Care Med* 1997;155:1925–1929.
- E14. Kennedy JD, Edward LJ, Bates DJ, et al. Effects of birthweight and oxygen supplementation on lung function in late childhood in children of very low birth weight. *Pediatric Pulmonology* 2000;30:32–40.
- E15. Kilbride HW, Gelatt MC, Sabath RJ. Pulmonary function and exercise capacity for ELBW survivors in preadolescence: effect of neonatal chronic lung disease. *The Journal of Pediatrics* 2003;143(4):488–493.
- E16. Korhonen P, Laitinen J, Hyodymna E, et al. Respiratory outcome in school-aged, very-low-birth-weight children in the surfactant era. *Acta Paediatr* 2004;93:316–321.
- E17. Baraldi E, Zanconato S, Zorzi C, et al. Exercise performance in very low birthweight children at the age of 7-12 years. *European Journal of Pediatrics*

1991;150:713–716.

- E18. Baraldi E, Bonetto G, Zacchello F, et al. Low exhaled nitric oxide in school-age children with bronchopulmonary dysplasia and airflow limitation. *Am J Respir Crit Care Med* 2005;171:68–72.
- E19. Barker M, Merz U, Herti MS, et al. School-age lung function and exercise capacity in former very low birth weight infants. *Pediatric Exercise Science* 2003;15:44–55
- E20. Mieskonen ST, Malmberg LP, Kari MA, et al. Exhaled nitric oxide at school age in prematurely born infants with neonatal chronic lung disease. *Pediatric Pulmonology* 2002;33:347–355.
- E21. Pianosi PT, Fisk M. High frequency ventilation trial nine year follow up of lung function. *Early Human Development* 2000;57:225–234.
- E22. Palta M, Sadek-Badawi M, Madden K, et al. Pulmonary testing using peak flow meters of very low birth weight children born in the perisurfactant era and school controls at age 10 years. *Pediatric Pulmonology* 2007;42:819–828.
- E23. Mitchell SH, Teague WG with the technical assistance of Amy Robinson. Reduced gas transfer at rest and during exercise in school-age survivors of bronchopulmonary dysplasia. *Am J Respir Crit Care Med* 1998;157:1406–1412.
- E24. Vrijlandt EJLE, Gerritsen J, Boezen HM, et al. Lung function and exercise capacity in young adults born prematurely. *Am J Respir Crit Care Med* 2006;173:890–896.
- E25. Wheeler WB, Castile RG, Brown ER, et al. Pulmonary function in survivors of prematurity. *American Review of Respiratory Disease* 1984;a218.
- E26. Abreu LR, Costa-Rangel RCA, Gastaldi AC, et al. Cardio-respiratory capacity

- assessment in children with bronchopulmonary dysplasia. *Rev. bras. fisioter*, 2007;11(2):95–100.
- E27. Guimaraes H, Rocha G, Pissarra S, et al. Respiratory outcomes and atopy in school-age children who were preterm at birth, with and without bronchopulmonary dysplasia. *Clinics* 2011;66(3):425–430.
- E28. Hakulinen AL, Jarvenpaa A-L, Turpeinen M, et al. Diffusing capacity of the lung in school -aged children born very preterm, with and without bronchopulmonary dysplasia. *Pediatric Pulmonology* 1996;21:353–360.
- E29. Berggren Brostrom E, Thunqvist P, Adenfelt G, et al. Obstructive lung disease in children with mild to severe BPD. *Respiratory Medicine* 2010;104:362–370.
- E30. Stanojevic S, Wade A, Cole TJ, et al. Spirometry centile charts for young Caucasian children: the Asthma UK Collaborative Initiative. *Am J Respir Crit Care Med* 2009; 180:547–552.
- E31. Stanojevic S, Wade A, Stocks J, et al. Reference ranges for spirometry across all ages: a new approach. *Am J Respir Crit Care Med* 2008;177:253–260.
- E32. Polgar G, Promadhat V. *Pulmonary function testing in children*. Philadelphia: Saunders, 1971.
- E33. Zapletal A, Paul T, Samanek M. Pulmonary elasticity in children and adolescents. *J Appl Physiol* 1976;40:953–961.
- E34. Hibbert ME, Lannigan A, Landau LI, et al. Lung function from a longitudinal study of healthy children and adolescents. *Pediatr Pulmonol* 1989;7:101–9.
- E35. Polgar G, Promadhat V. *Pulmonary Testing in Children: Technics and Standards*. Philadelphia, PA: W.B.Saunders Company, 1971.
- E36. Schwartz JD, Katz SA, Fegley RW, et al. Analysis of spirometric data from a

- national sample of healthy 6- to 24- year- olds (NHANES II). *Am Rev Respir Dis* 1988;188:1405–1414.
- E37. Knudson RJ, Lebowitz MD, Holberg CJ, et al. Changes in normal maximal expiratory flow-volume curve with growth and aging. *Am Rev Respir Dis* 1983; 127:725–34.
- E38. SensorMedics Corporation. Normal predicted equation sets. 2200 Pulmonary function laboratory operator's manual. 1989;F22–F23
- E39. Quanjer PH, Borsboom GJ, Brunekre B et al. Spirometric reference values for white European children and adolescents: Polgar revisited. *Pediatr Pulmonol* 1995; 19: 135–142
- E40. Knudson RJ, Slatin RC, Lebowitz MD, et al. The maximal expiratory flow-volume curve: normal standards, variability, and effects of age. *Am Rev Respir Dis* 1976; 113:587–600
- E41. Crapo RO, Morris AH, Gardener RM. Reference spirometric values using techniques and equipment that meet ATS recommendations. *Am. Rev. Respir. Dis.* 1981;123:185–189
- E42. Hsu KH, Jenkins DE, His BP, et al. Ventilatory functions of normal children and young adults – Mexican-American, white and black. I. Spirometry. *J Pediatr* 1979;95:14–23
- E43. Koillinen H, Wanne O, Niemi V, et al. Terveiden suomalaislasten spirometrian ja uloshengityksen huippuvirtauksen viitearvot. *SLL* 1998; 5: 395–402.
- E44. Bucci G, Cook CD, Barrie H. Studies of respiratory physiology in children. V: Total lung diffusion, diffusing capacity of pulmonary membrane and pulmonary capillary blood volume in normal subjects from 7-40 years of age. *J Pediatr*

1961;58:820–828.

- E45. Morris JF, Koski A, Breese J. Normal values and evaluation of forced expiratory flow. *Am Rev Resp Dis* 1975;111:755–62
- E46. Jaeger Asthma Monitor software (AMOS) based on Zapletal A, Paul T, Samanek M. Significance of contemporary methods of lung function testing for detection of airway obstruction in children and adolescents. *Z Erkr Atmungsorgane* 1977;149:343–371
- E47. Quanjer PH, Tammeling GJ, Cotes JE, et al. Lung volumes and forced ventilatory flows. Report Working Party Standardization of Lung Function Tests, European Community for Steel and Coal. Official Statement of the European Respiratory Society. *Eur Respir J Suppl* 1993;16:5–40
- E48. Solymar L, Aronsson PH, Bake B, et al. Nitrogen single breath test, flow-volume curves and spirometry in healthy children, 7-18 years of age. *Eur Respir Dis* 1980;61:275–286.
- E49. Cotes JE, Dabs JM, Elwood PC, et al. Iron –deficiency anaemia: Its effect on transfer factor for the lung (diffusing capacity) and ventilation and cardiac frequency during sub-maximal exercise. *Clin Sci.* 1972; 42:325–335
- E50. Zapletal A, Paul T, Samanek M. Die Bedeutung heutiger Methoden der Lungenfunktionsdiagnostik zur Feststellung einer Obstruktion der Atemwege bei Kindern und Jugendlichen. *Z Erkr Atmungsorgane.* 1977; 149:343–371.
- E51. Bader D, Ramos AD, Lew CD, et al. Childhood sequelae of infant lung disease: exercise and pulmonary function abnormalities after bronchopulmonary dysplasia. *J Pediatr* 1987;110(448–56).
- E52. Karila C, Saulnier JP, Elie C, et al. Exercise-induced alveolar hypoventilation in

long-term survivors of bronchopulmonary dysplasia. *Rev Mal Respir*  
2009;26:e61–8.

E53. Koumbourlis AC, Motoyama EK, Mutich RL, et al. Longitudinal follow-up of lung function from childhood to adolescence in prematurely born patients with neonatal chronic lung disease. *Pediatric Pulmonology* 1996; 21:28–34.

E54. Santuz P, Baraldi E, Zaramella P, et al. Factors limiting exercise performance in long-term survivors of bronchopulmonary dysplasia. *Am J Respir Crit Care Med* 1995;152:1284–1289.

E55. Northway WH, Moss RB, Carlisle KB, et al. Late pulmonary sequelae of bronchopulmonary dysplasia. *The New England Journal of Medicine* 1990;323(26):1793–1799.

E56. Ng DK, Lau WY, Lee SL. Pulmonary sequelae in long-term survivors of bronchopulmonary dysplasia. *Pediatrics International* 2000;42:603–607

E57. Smyth JA, Tabachnik E, Duncan WJ, et al. Pulmonary function and bronchial hyperreactivity in long-term survivors of bronchopulmonary dysplasia. *Pediatrics* 1981;68(3):336–340.

E58. Ahrens P, Zielen S, Stover B, et al. Long term pulmonary and allergic outcome of very low birth weight prematures with and without bronchopulmonary dysplasia. *Klin Padiatr* 1991;203:366–371

E59. Blayney M, Kerem E, Whyte H, et al. Bronchopulmonary dysplasia: Improvement in lung function between 7 and 10 years of age. *J Pediatr* 1991;118:201–206.

E60. Aquino SL, Schechter MS, Chiles C, et al. High-resolution inspiratory and expiratory CT in older children and adults with bronchopulmonary dysplasia.

American Journal of Roentgenology 1999;173:963–967.

- E61. Zapletal A, Samanek M, Paul T. Lung function in children and adolescents. In: Herzog H, editor. Progress in Respiration Research. Basel, Karger Ed, 1987.
- E62. Weng T-R, Levison H. Standards of pulmonary function in children. Am Rev Respir Dis. 1969; 99:879–894.
- E63. Schoenburg JB, Beck GJ, Bouhuys A. Growth and decay of pulmonary function in healthy blacks and whites. Respir Physiol. 1978;33:367–393.
- E64. Boyd E. Growth of the surface area of the human body. Minneapolis: University of Minnesota Press, 1935:132–3.
- E65. Fenn WO, Rahn H, section eds. Handbook of physiology. Section 3, Respiration. Vol. 11. Washington D.C.: American Physiological Society, 1965:930–1.
- E66. Kanner RE, Morris AH, eds. Clinical pulmonary function testing. Salt Lake City: Intermountain Thoracic Society, 1975.
- E67. Morris JF, Koshi A, Johnson LC. Spirometric standards for healthy non-smoking adults. Am Rev Respir Dis 1971; 103:57–67
- E68. Bates DV, Macklem PT, Christie RV. Respiratory function in disease: an introduction to the integrated study of the lung. Philadelphia: W.B. Saunders, 1971:93–94
- E69. His BP, Hsu KH, Jenkins DE. Ventilatory functions of normal children and young adults – Mexican-American, white and black. III. Sitting height as a predictor. J Pediatr 1983; 102:860–5
- E70. Lamm KK, Pang SC, Allan WGL et al. Predictive nomograms for forced expiratory, forced vital capacity, and peak expiratory flow rate in Chinese adults



- and children. *Br. J. Dis. Chest* 1983; 77:390–6.
- E71. Berman W Jr, Katz R, Yabek SM, et al. Long-term follow-up of bronchopulmonary dysplasia. *The journal of pediatrics* 1986;109(1):45–50.
- E72. Morris AH, Kanner R, Crapo R, et al, eds. *Clinical pulmonary function testing* 2<sup>nd</sup> ed. Salt Lake City: Intermountain Thoracic Society 1984.
- E73. Konefal H, Czeszynka MB, Sardesai S, et al. Pulmonary function in school-aged children with mild to moderate infant respiratory distress syndrome requiring nasal continuous positive airway pressure. *Ginekol Pol* 2010;81:768–773.
- E74. Anand D, Stevenson CJ, West CR, et al. Lung function and respiratory health in adolescents of very low birth weight. *Arch Dis Child* 2003;88:135–138.
- E75. Burns YR, Danks M, O'Callaghan MJ, et al. Motor coordination difficulties and physical fitness of extremely low birthweight children. *Developmental Medicine and Child Neurology* 2009;51:136–142.
- E76. Evenson KAI, Steinshamn S, Tjonna AE, et al. Effects of preterm birth and fetal growth retardation on cardiovascular risk factors in young adulthood. *Early Human Development* 2009;85:239–245.
- E77. Gappa M, Berner MM, Hohenschild S, et al. Pulmonary function in school-age in surfactant-treated preterm infants. *Pediatric Pulmonology* 1999;27:191–198.
- E78. Grischkan J, Storfer-Isser A, Rosen CL, et al. Variation in childhood asthma among former preterm infants. *The Journal of Pediatrics* 2004;144(3):321–326.
- E79. Wagner CL, Brooks JG, Richter SE, et al. The "88% saturation test": A simple lung function test for young children. *Pediatrics* 1994;93(1):63–67.
- E80. Mai X-M, Gaddlin P-O, Nilsson L, et al. Asthma, lung function and allergy in 12-year-old children with very low birth weight: a prospective study. *Pediatr*

- Allergy Immunol 2003;14:184–192.
- E81. MacLusky IB, Stringer D, Zarfén J, et al. Cardiorespiratory status in long-term survivors of prematurity, with and without hyaline membrane disease. *Pediatric Pulmonology* 1986;2(2):94–102.
- E82. Odberg MD, Sommerfelt K, Markestad T, et al. Growth and somatic health until adulthood of low birthweight children. *Arch Dis Child Fetal Neonatal Ed* 2010;95:F201–F205.
- E83. Rivlin J, Pape K, Reilly BJ, et al. Long-term follow up of children with Wilson-Mikity syndrome. *Eur J Respir Dis* 1985;67:286–293.
- E84. Wiebicke W, Poynter A, Chernick V. Normal lung growth following antenatal dexamethasone treatment for respiratory distress syndrome. *Pediatric Pulmonology* 1988;5:27–30.
- E85. von Mutius E, Nicolai T, Martinez FD. Prematurity as a risk factor for asthma in preadolescent children. *The Journal of Pediatrics* 1993;123(2):223–229
- E86. Smith LJ, van Asperen PP, McKay KO, et al. Reduced exercise capacity in children born very preterm. *Pediatrics* 2008;122:e287–e293.#
- E87. Telford K, Waters L, Vyas H, et al. Respiratory outcome in late childhood after neonatal continuous negative pressure ventilation. *Archives of Disease in Childhood-Fetal and Neonatal Edition* 2007;92(1):F19–F24.
- E88. Siltanen M, Savilahti E, Pohjavuori M, et al. Respiratory Symptoms and Lung Function in Relation to Atopy in Children Born Preterm. *Pediatric Pulmonology* 2004;37(1):43–49.
- E89. Gross SJ, Anbar RD, Mettelman BB. Follow-up at 15 years of preterm infants from a controlled trial of moderately early dexamethasone for the prevention of

- chronic lung disease. *Pediatrics* 2005;115(3):681–687.
- E90. Nikolajev K, Heinonen K, Hakulinen A, et al. Effects of intrauterine growth retardation and prematurity on spirometric flow values and lung volumes at school age in twin pairs. *Pediatric Pulmonology* 1998;25:367–370.
- E91. Bertrand J-M, Riley SP, Popkin J, et al. The long-term pulmonary sequelae of prematurity: the role of familial airway hyperreactivity and the respiratory distress syndrome. *The New England Journal of Medicine* 1985;312:742–745.
- E92. Borkenstein J, Borkenstein M, Rosegger H. Pulmonary function studies in long-term survivors with artificial ventilation in the neonatal period. *Acta Paediatr Scand* 1980;69:159–163.
- E93. Roca J, Burgos F, Sunyer J et al. Reference values for forced spirometry. Group of the European Community Respiratory Health Survey. *Eur Respir J*. 1998;11:1354–1362.
- E94. European Respiratory Society. Standardized lung function testing. *Eur Respir J suppl* 1993;6(suppl 16).
- E95. Quanjer P, Stocks J, Polgar G, et al. Compilation of reference values for lung function measurements in children. *Eur Respir J* 1989;2:184–261.
- E96. Weng T, Levison A. Pulmonary function in children with asthma at acute attack and symptom-free status. *Am Rev Respir Dis* 1969;99:719–728.
- E97. Zapletal A, Motoyama EK, Van De Woestijne KP, et al. Maximum expiratory flow volume curves and airway conductance in children and adolescents. *J Appl Physiol*. 1969;26:308
