# Supplementary material for: Effect of preterm birth on later FEV1: a systematic review and meta-analysis
Source: HighWire-hosted journal article supplement (doi:10.1136/thoraxjnl-2012-203079), 2013-04-20
Supplement: thoraxjnl-2012-203079supp_figures.pdf [file thoraxjnl-2012-203079supp_figures.pdf]

| Study               | Weight | Study Est | 95% CI |        |
|---------------------|--------|-----------|--------|--------|
|                     |        |           | Lower  | Upper  |
| Wheeler 1984        | 0.02   | 106       | 97.1   | 114.9  |
| Arad 1987           | 0.03   | 82.6      | 75.91  | 89.29  |
| Galdes-Sebaldt 1989 | 0.04   | 82.37     | 79.55  | 85.19  |
| De Kleine 1990      | 0.04   | 90.34     | 86.4   | 94.28  |
| Baraldi 1991        | 0.04   | 94.2      | 89.7   | 98.7   |
| Giacioia 1997       | 0.02   | 85.9      | 73.55  | 98.25  |
| Gross 1998          | 0.04   | 98        | 93.15  | 102.85 |
| Jacob 1998          | 0.03   | 85.1      | 79.63  | 90.57  |
| Mitchell 1998       | 0.02   | 85        | 75.7   | 94.3   |
| Kennedy 2000        | 0.04   | 95.4      | 92.84  | 97.96  |
| Pianosi 2000        | 0.03   | 83        | 76.42  | 89.58  |
| Doyle 2001          | 0.04   | 96.7      | 94.53  | 98.87  |
| Mieskonen 2002      | 0.03   | 89.8      | 83.79  | 95.81  |
| Kilbride 2003       | 0.04   | 89        | 84.63  | 93.37  |
| Barker 2003         | 0.03   | 101       | 92.85  | 109.15 |
| Korhonen 2004       | 0.04   | 95        | 90.07  | 99.93  |
| Halvorsen 2005      | 0.03   | 94.7      | 89.66  | 99.74  |
| Baraldi 2005        | 0.03   | 90.3      | 84.81  | 95.79  |
| Doyle 2006          | 0.04   | 87.1      | 85.27  | 88.93  |
| Vrijlandt 2006      | 0.02   | 99.2      | 89.07  | 109.33 |
| Kulasekaran 2007    | 0.04   | 87.3      | 83.75  | 90.85  |
| Palta 2007          | 0.04   | 88        | 86.09  | 89.91  |
| Abreu 2007          | 0.02   | 100       | 91.32  | 108.68 |
| Fawke 2010          | 0.04   | 90        | 85.96  | 94.04  |
| Smith 2011          | 0.04   | 87        | 84.06  | 89.94  |

Figure E1 Preterm group (no BPD) where the results were reported as percentages of predicted values

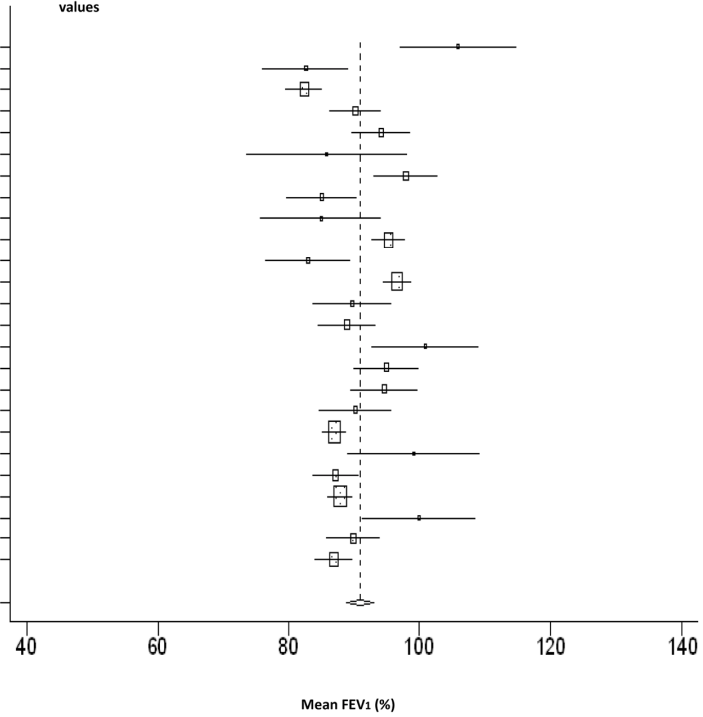

Random pooled est = 90.980 95% CI lower = 88.841, upper = 93.119  
Heterogeneity: Q= 164.448 on 24 degrees of freedom (p=0.000)  
Moment-based estimate of between studies variance = 22.076

| Study            | Weight | Study Est | 95% CI |        |
|------------------|--------|-----------|--------|--------|
|                  |        |           | Lower  | Upper  |
| Smyth 1981       | 0.01   | 67.8      | 55.52  | 80.08  |
| Wheeler 1984     | 0.01   | 82        | 70.18  | 93.82  |
| Bader 1987       | 0.01   | 73        | 61.22  | 84.78  |
| De Kleine 1990   | 0.01   | 73        | 62.95  | 83.05  |
| Northway 1990    | 0.02   | 74.8      | 69.12  | 80.48  |
| Ahrens 1991      | 0.02   | 77.11     | 71.53  | 82.69  |
| Santuz 1995      | 0.02   | 83        | 75.64  | 90.36  |
| Koumbourlis 1996 | 0.02   | 98.6      | 91.85  | 105.35 |
| Mitchell 1998    | 0.01   | 78        | 64.98  | 91.02  |
| Kennedy 2000     | 0.02   | 78.4      | 71.87  | 84.93  |
| Pianosi 2000     | 0.02   | 86        | 79.34  | 92.66  |
| Ng 2000          | 0.01   | 95        | 80.63  | 109.37 |
| Doyle 2001       | 0.02   | 88.5      | 82.79  | 94.21  |
| Barker 2003      | 0.02   | 90        | 82.39  | 97.61  |
| Korhonen 2004    | 0.02   | 90        | 84.9   | 95.1   |
| Halvorsen 2005   | 0.02   | 86.4      | 83.69  | 89.11  |
| Baraldi 2005     | 0.02   | 77.8      | 73.29  | 82.31  |
| Vrijlandt 2006   | 0.01   | 90.1      | 76.38  | 103.82 |
| Abreu 2007       | 0.02   | 99        | 92.48  | 105.52 |
| Karila 2009      | 0.02   | 79.1      | 70.64  | 87.56  |

Figure E2 BPD (oxygen dependency at 28 days of life) where the results were reported as percentages of predicted values

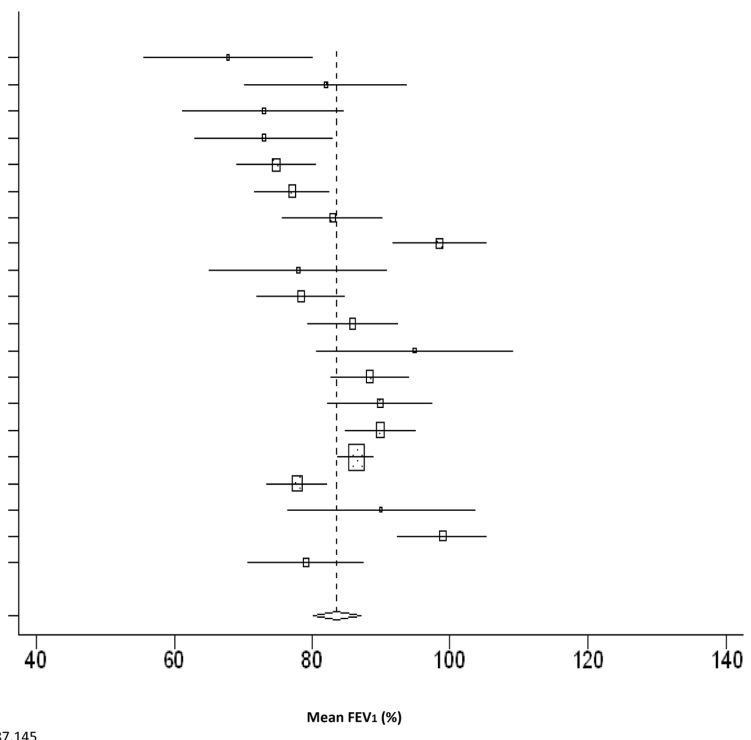

Random pooled est = 83.666 95% CI lower = 80.187, upper = 87.145  
Heterogeneity: Q=97.283 on 19 degrees of freedom (p=0.000)  
Moment-based estimate of between studies variance = 45.393

| Study            | Weight | Study |             |
|------------------|--------|-------|-------------|
|                  |        | Est   | 95% CI      |
|                  |        | Lower | Upper       |
| Berman 1986      | 0.01   | 63    | 47.51 78.49 |
| Giacioia 1997    | 0.02   | 72.7  | 60.74 84.66 |
| Gross 1998       | 0.07   | 83    | 77.92 88.08 |
| Jacob 1998       | 0.03   | 63.6  | 53.18 74.02 |
| Mieskonen 2002   | 0.04   | 73.5  | 65.66 81.34 |
| Kilbride 2003    | 0.05   | 72    | 64.65 79.35 |
| Korhonen 2004    | 0.04   | 82    | 73.94 90.06 |
| Halvorsen 2005   | 0.08   | 81.4  | 77.12 85.68 |
| Doyle 2006       | 0.1    | 81.1  | 78.25 83.95 |
| Kulasekaran 2007 | 0.08   | 82.3  | 78.33 86.27 |
| Palta 2007       | 0.09   | 78    | 74.68 81.32 |
| Fawke 2010       | 0.11   | 80    | 77.76 82.24 |
| Smith 2011       | 0.08   | 83    | 79.13 86.87 |

Figure E3 BPD (supplemental oxygen-dependency 36 weeks PMA) where the results were reported as percentages of predicted values

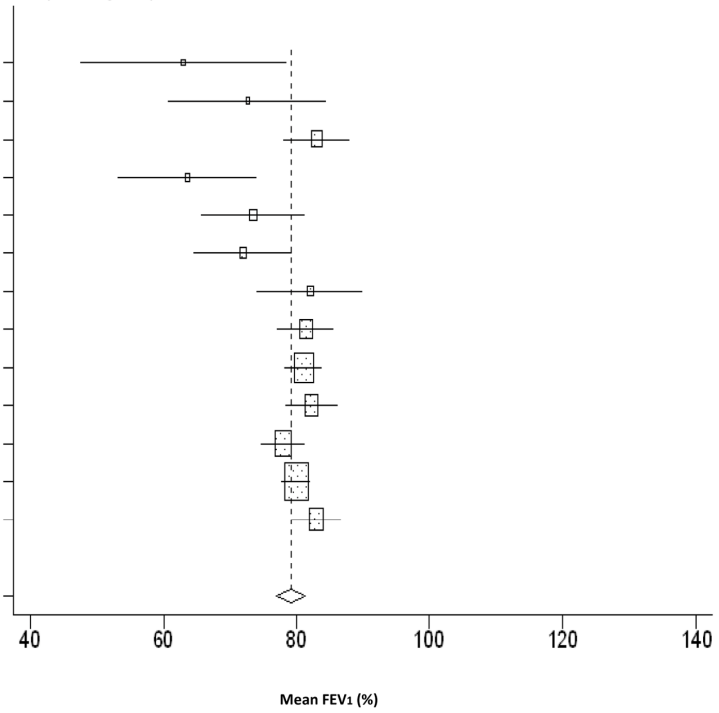

Random pooled est = 79.096 95% CI lower = 76.911, upper = 81.282  
Heterogeneity:  $I^2=30.311$  on 12 degrees of freedom ( $p=0.003$ )  
Moment-based estimate of between studies variance = 7.967

| Study               | Weight | Study Est | 95% CI |        |
|---------------------|--------|-----------|--------|--------|
|                     |        |           | Lower  | Upper  |
| Borkenstein 1980    | 0.02   | 65.4      | 58.76  | 72.04  |
| Rivlin 1985         | 0.02   | 81.3      | 75.69  | 86.91  |
| Bertrand 1985       | 0.02   | 76        | 70.26  | 81.74  |
| MacLusky 1986       | 0.02   | 91.2      | 87.57  | 94.83  |
| Arad 1987           | 0.02   | 82.6      | 75.91  | 89.29  |
| Wiebicke 1988       | 0.02   | 86.3      | 82.4   | 90.2   |
| Galdes-Sebaldt 1989 | 0.02   | 82.37     | 79.55  | 85.19  |
| De Kleine 1990      | 0.02   | 87.83     | 83.93  | 91.73  |
| Baraldi 1991        | 0.02   | 94.2      | 89.7   | 98.7   |
| von Mutius 1993     | 0.02   | 98.7      | 96.81  | 100.59 |
| Wagner 1994         | 0.01   | 121.2     | 104.77 | 137.63 |
| Gross 1998          | 0.02   | 91.3      | 87.5   | 95.1   |
| Nikolajev 1998      | 0.02   | 90.2      | 87.31  | 93.09  |
| Gappa 1999          | 0.02   | 101.93    | 96.75  | 107.11 |
| Kennedy 2000        | 0.02   | 91        | 88.11  | 93.89  |
| Doyle 2001          | 0.02   | 94.82     | 92.65  | 96.99  |
| Mieskonen 2002      | 0.02   | 84.1      | 79.67  | 88.53  |
| Anand 2003          | 0.02   | 94.9      | 92.51  | 97.29  |
| Kilbride 2003       | 0.02   | 85        | 81.12  | 88.88  |
| Mai 2003            | 0.02   | 92        | 89.27  | 94.73  |
| Grischkan 2004      | 0.02   | 90.6      | 88.65  | 92.55  |
| Sittanen 2004       | 0.02   | 92        | 88.37  | 95.63  |
| Gross 2005          | 0.02   | 79.96     | 71.94  | 87.98  |
| Doyle 2006          | 0.02   | 84.9      | 83.29  | 86.51  |
| Vrijlandt 2006      | 0.02   | 95.4      | 90.59  | 100.21 |
| Palta 2007          | 0.02   | 86        | 84.31  | 87.69  |
| Telford 2007        | 0.02   | 85.5      | 83.34  | 87.66  |
| Abreu 2007          | 0.02   | 99.43     | 94.28  | 104.58 |
| Smith 2008          | 0.02   | 85        | 82.81  | 87.19  |
| Burns 2009          | 0.02   | 88.98     | 85.35  | 92.61  |
| Evenson 2009        | 0.02   | 85.2      | 81.69  | 88.71  |
| Konefal 2010        | 0.02   | 95.07     | 89.9   | 101.24 |
| Fawke 2010          | 0.02   | 83        | 80.97  | 85.03  |
| Odberg 2010         | 0.02   | 106.8     | 104.51 | 109.09 |

Figure E4 Preterm group (including groups with BPD) where the results were reported as percentages of predicted values

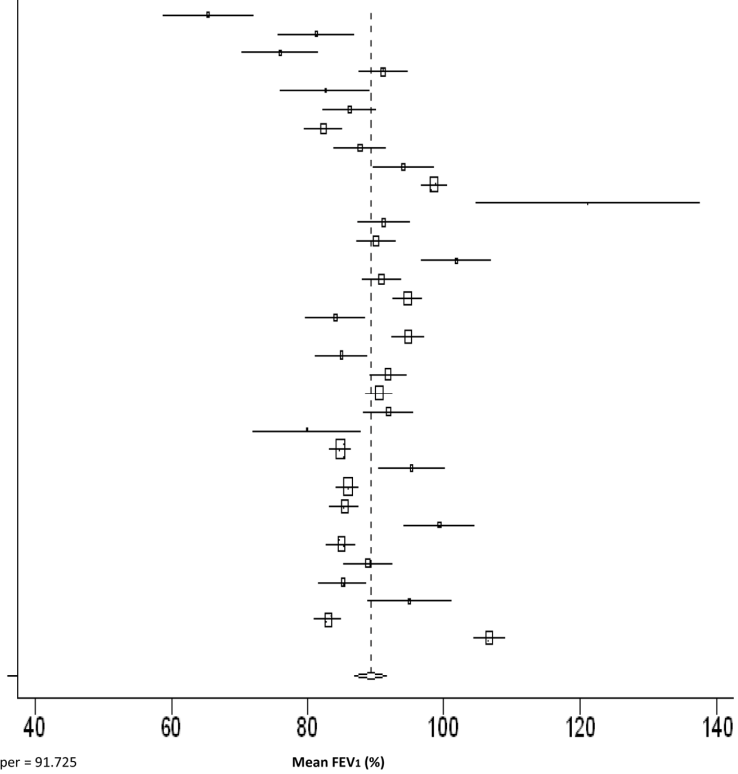

Random pooled est = 89.361 95% CI lower = 86.998, upper = 91.725

Heterogeneity:  $I^2=677.081$  on 33 degrees of freedom ( $p=0.000$ )

Moment-based estimate of between studies variance = 44.464
